# Supplementary material for: Alzheimer’s Disease Immunotherapy and Mimetic Peptide Design for Drug Development: Mutation Screening, Molecular Dynamics, and a Quantum Biochemistry Approach Focusing on Aducanumab::Aβ2–7 Binding Affinity
Source: PubMed Central journal article supplement (PMC11450751; doi:10.1021/acschemneuro.4c00453), 2024-09-20
Supplement: cn4c00453_si_001.pdf [file cn4c00453_si_001.pdf]

## Supporting Information

**Alzheimer's disease immunotherapy and mimetic peptides design for drug development: mutations screening, molecular dynamics, and a quantum biochemistry approach focusing on Aducanumab::A $\beta$ 2-7 binding affinity**

Victor L.B. França\*, Eveline M. Bezerra, Roner F. da Costa, Hernandes F. Carvalho, Valder N. Freire, and Geanne Matos

### Author Information

Victor L.B. França\* – *Department of Physiology and Pharmacology, Federal University of Ceará, 60430-270, Fortaleza, Ceará, Brazil*

Eveline M. Bezerra – *Department of Sciences, Mathematics and Statistics, Federal Rural University of Semi-Arid (UFERSA), 59625-900, Mossoró, RN, Brazil*

Roner F. da Costa – *Department of Sciences, Mathematics and Statistics, Federal Rural University of Semi-Arid (UFERSA), 59625-900, Mossoró, RN, Brazil*

Hernandes F. Carvalho – *Department of Structural and Functional Biology, Institute of Biology, State University of Campinas, 13083-864 Campinas, São Paulo, Brazil.*

Valder N. Freire – *Department of Physics, Federal University of Ceará, 60430-270, Fortaleza, Ceará, Brazil*

Geanne Matos – *Department of Physiology and Pharmacology, Federal University of Ceará, 60430-270, Fortaleza, Ceará, Brazil*

\*Corresponding Author:

**Victor L.B. França**

Email address: victor.bernardesf@alu.ufc.br,

ORCID: <https://orcid.org/0000-0002-2731-3897>

Postal address: Department of Physics, Federal University of Ceará, CE, Brazil;  
Laboratory of Applied Biophysics, Av. Mister Hull, Caixa Postal 60451 Fortaleza, CE,  
Brazil. Tel: +55 85 33669822; Fax: +55 85 33669789.

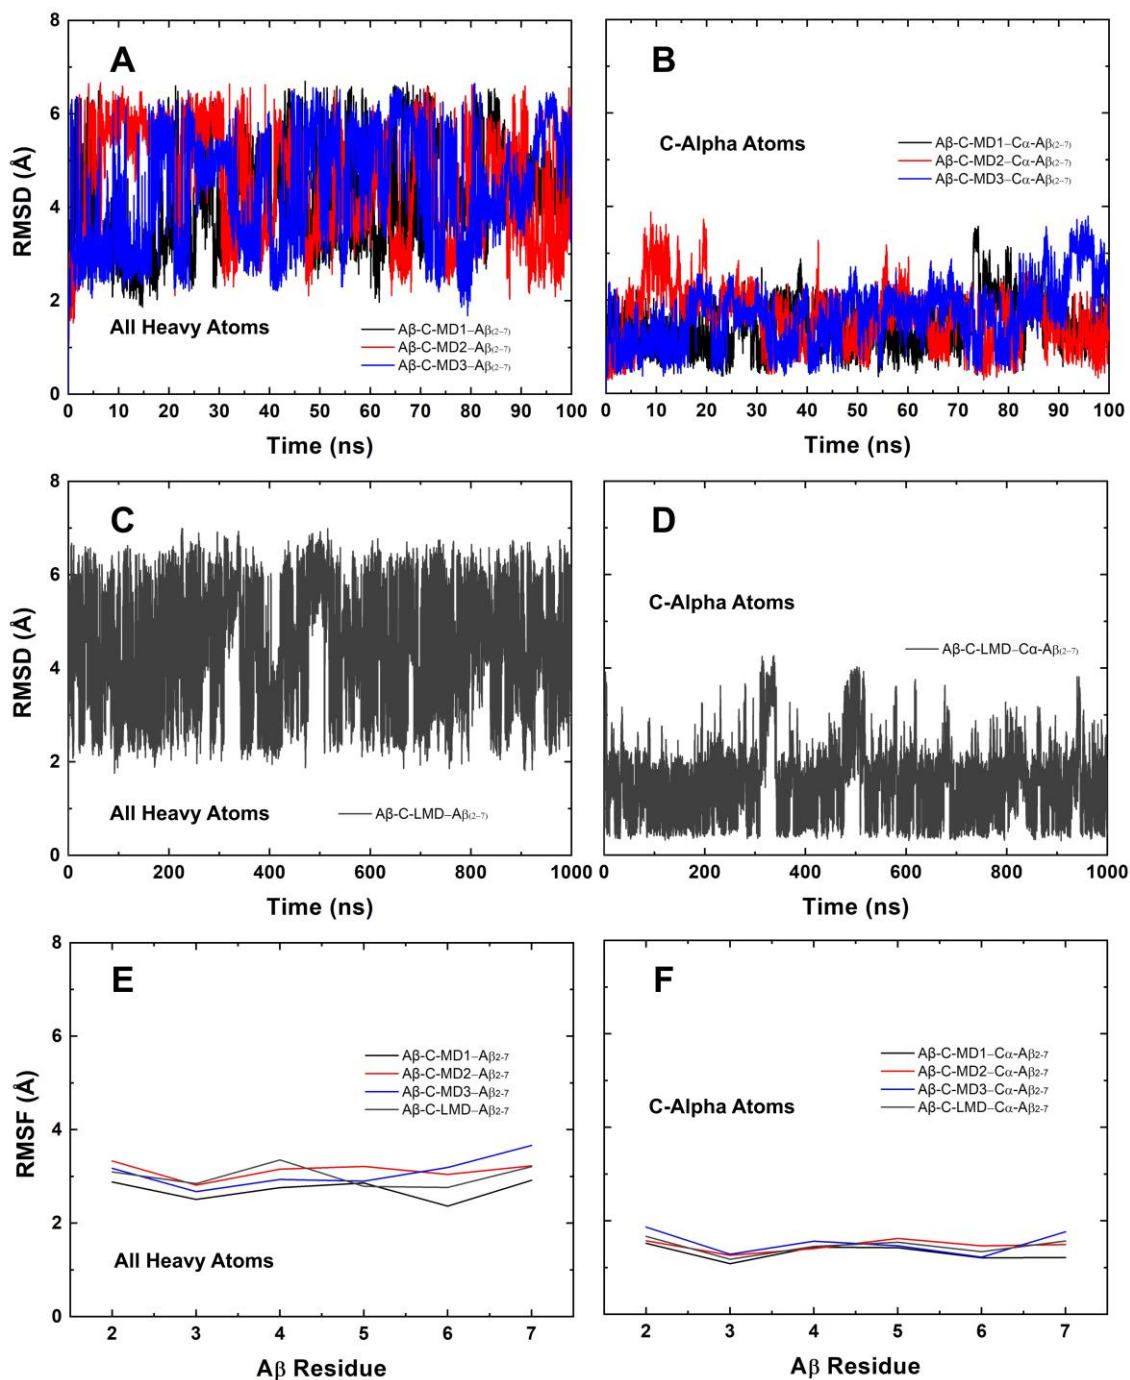

**Figure S1** – (A-B) RMSD values over time for short simulation replicas. (C-D) RMSD values over time for long simulations of unbounded Aβ<sub>2-7</sub>. (E-F) Comparison of RMSF values of residues in the unbounded state of Aβ<sub>2-7</sub>, considering short MD replicas and long MD simulations.

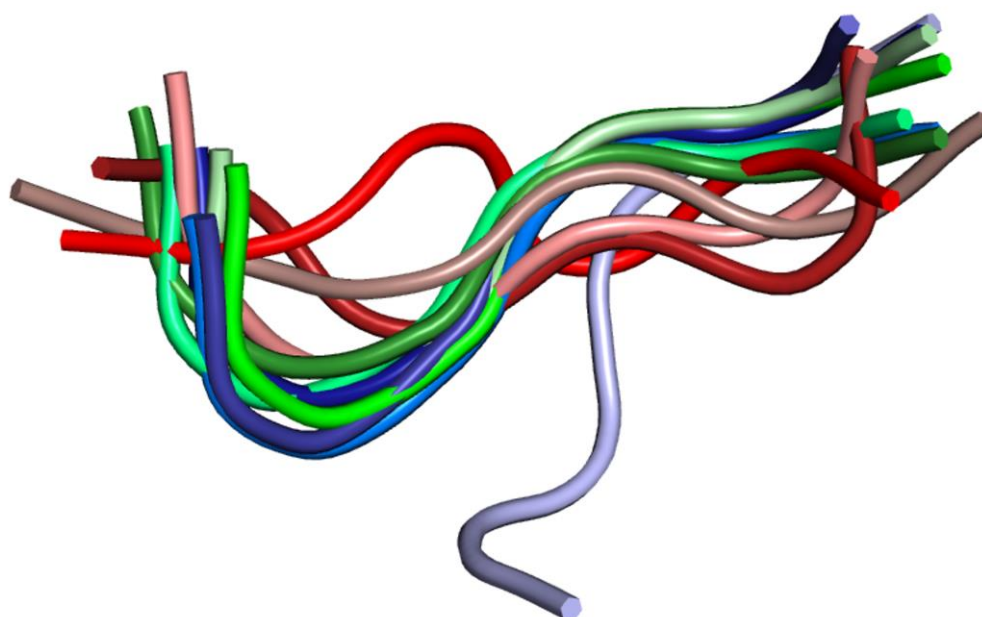

|                                                                                              |                                                                                             |                                                                                               |
|----------------------------------------------------------------------------------------------|---------------------------------------------------------------------------------------------|-----------------------------------------------------------------------------------------------|
|  MD1       |  MD4      |  Aβ-C-MD1  |
|  MD2      |  MD5     |  Aβ-C-MD2 |
|  MD3      |  MD6     |  Aβ-C-MD3 |
|  LMD-Wild |  LMD-Mut |  Aβ-C-LMD |

**Figure S2** – Structural alignment between Aβ<sub>2-7</sub> conformations at the final atomic coordinates, as provided by molecular dynamics simulations of Adu-Wild::Aβ<sub>2-7</sub>, Adu-Mut::Aβ<sub>2-7</sub>, and Aβ<sub>2-7</sub> alone. The conformations are colored in shades of green, purple, and red, respectively.

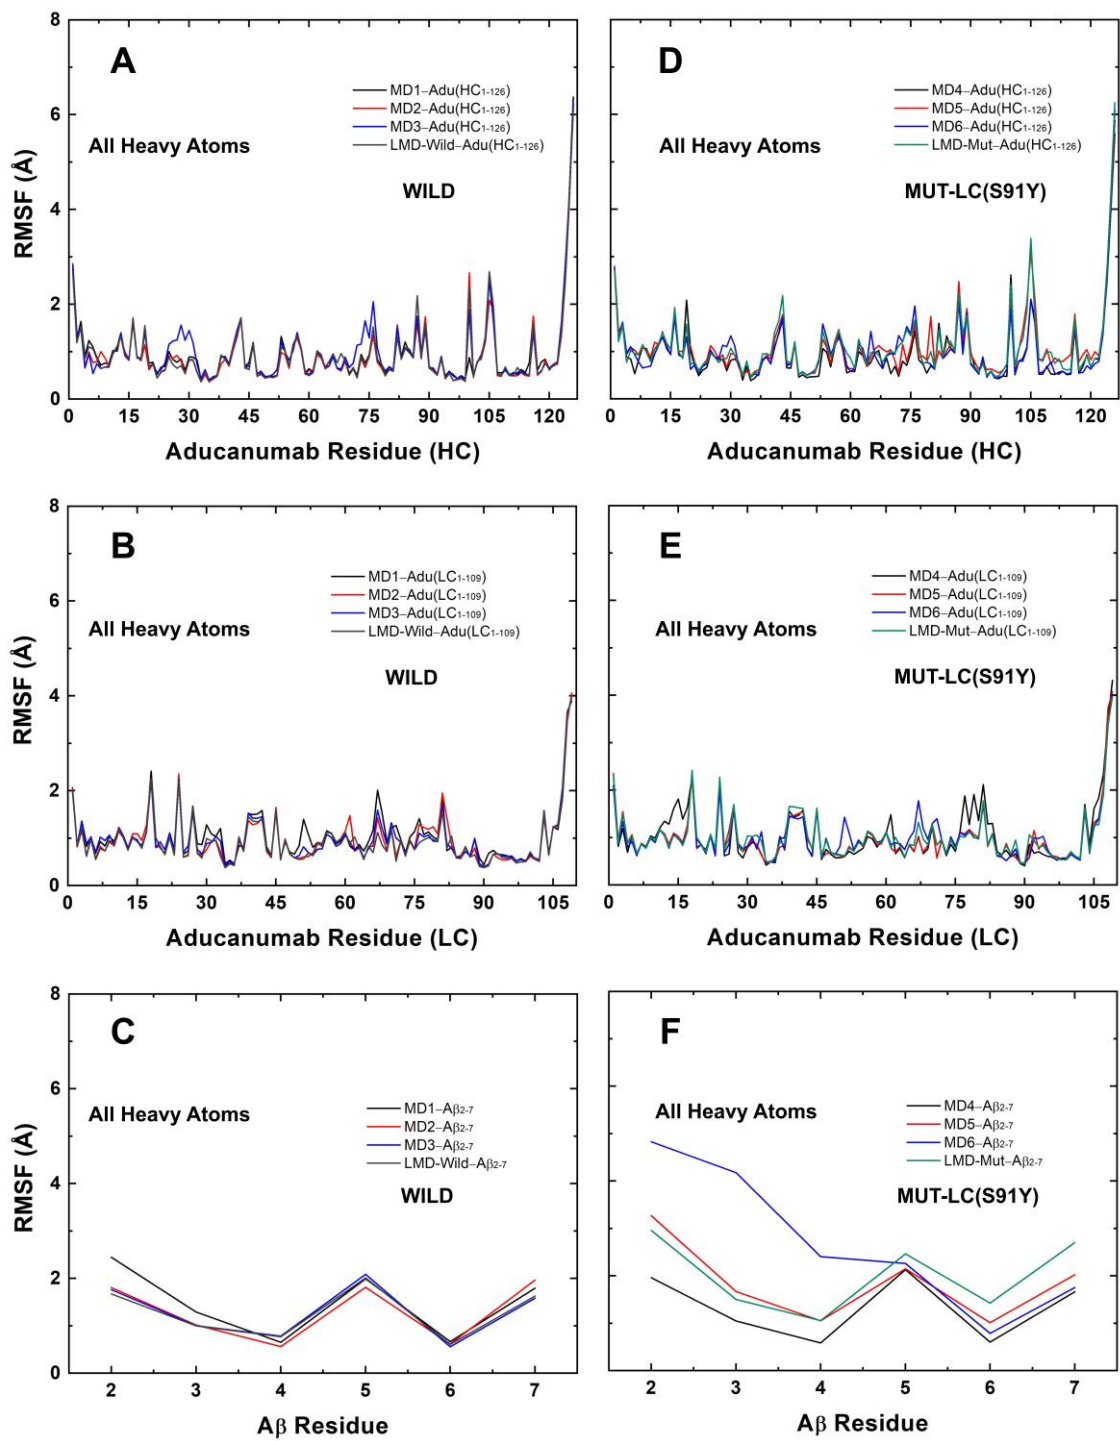

**Figure S3** – RMSF of (A-C) wild and (D-F) mutated Aducanumab::Aβ<sub>2-7</sub> based on all heavy atoms.

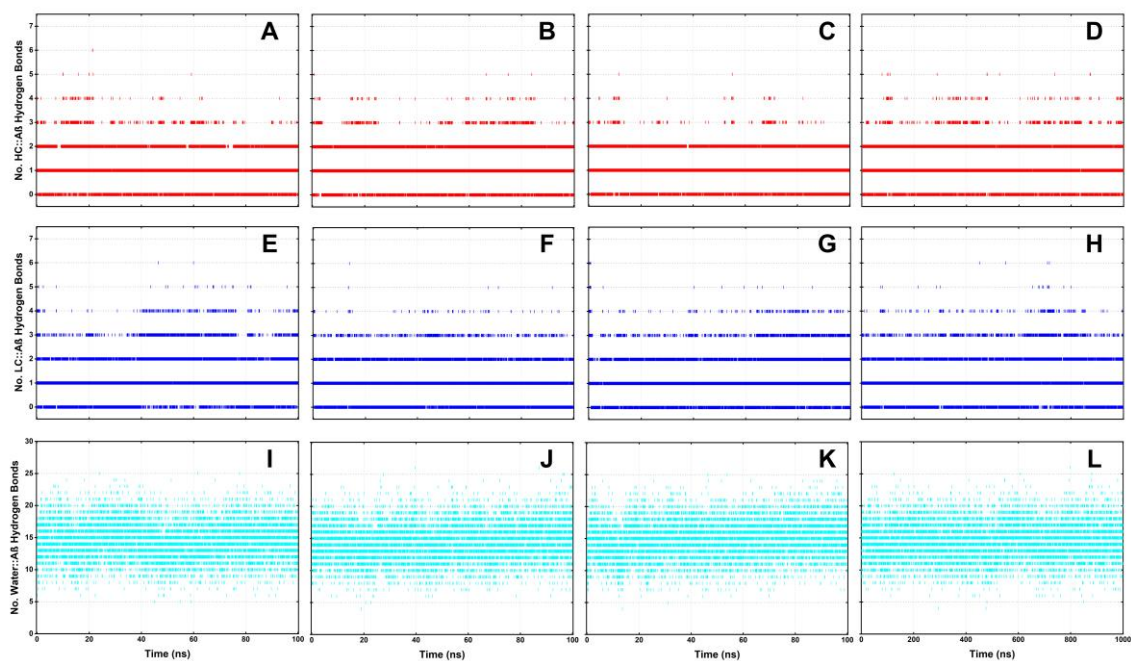

**Figure S4** – Number of hydrogen bonds established in (A-D) Adu-HC::A $\beta_{2-7}$ , (E-H) Adu-LC::A $\beta_{2-7}$ , and (I-L) water::A $\beta_{2-7}$  interfaces. (A, E, and I) MD1, (B, F, and J) MD2, (C, G, and K) MD3, and LMD-Wild (D, H, and L) data are illustrated.

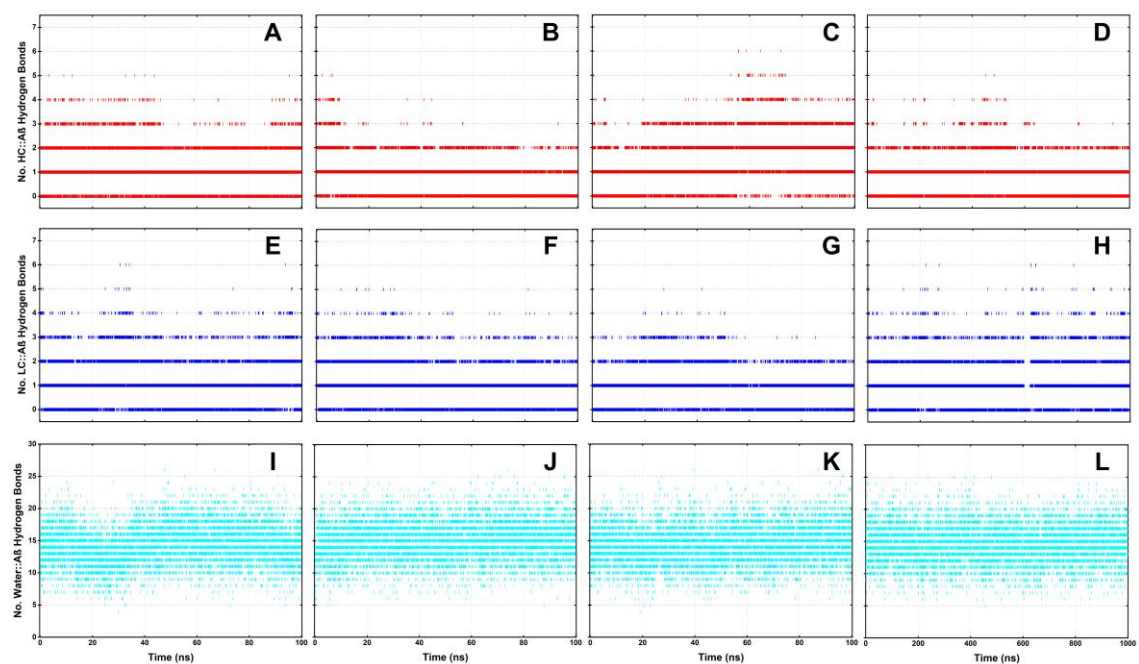

**Figure S5** – Number of hydrogen bonds established in (A-D) Adu-HC::A $\beta_{2-7}$ , (E-H) Adu-LC::A $\beta_{2-7}$ , and (I-L) water::A $\beta_{2-7}$  interfaces. (A, E, and I) MD4, (B, F, and J) MD5, (C, G, and K) MD6, and LMD-Mut (D, H, and L) data are illustrated.

**Table S1** – Description of nonbonded interactions calculated on the Aducanumab::A $\beta$ <sub>2-7</sub> interface comprise hydrophobic, salt bridge, and hydrogen bond contacts. These interactions were determined in the final atomic conformation of MD1, MD2, MD3, MD4, MD5, MD6, LMD-Wild (LMD-W), and LMD-Mut (LMD-M) samples.

| Interaction | Adu Residue  | Adu Chain | A $\beta$ Residue       | Sample (MD)                         | Distance (Å) |
|-------------|--------------|-----------|-------------------------|-------------------------------------|--------------|
| Hydrophobic | TRP52        | Heavy     | PHE4                    | MD1/MD2/MD3/MD6/LMD-W/              |              |
|             | LYS57        | Heavy     | GLU3                    | MD6                                 |              |
|             | LYS57        | Heavy     | PHE4                    | MD6                                 |              |
|             | TYR59        | Heavy     | GLU3                    | MD1/MD2/MD4/MD5/MD6/LMD-W/LMD-M     |              |
|             | TYR59        | Heavy     | PHE4                    | MD4/MD5/MD6/LMD-W                   |              |
|             | LYS65        | Heavy     | GLU3                    | MD1/MD2/MD3/MD4/MD5/LMD-W/LMD-M     |              |
|             | ILE102       | Heavy     | HIS6                    | MD1/MD3/MD4/MD6/LMD-W               |              |
|             | ALA104       | Heavy     | ASP7                    | MD6                                 |              |
|             | ARG105       | Heavy     | PHE4                    | MD2/MD4                             |              |
|             | ARG105       | Heavy     | ARG5                    | MD2/MD4                             |              |
|             | ARG105       | Heavy     | ASP7                    | MD2/MD4                             |              |
|             | GLY107       | Heavy     | PHE4                    | MD1/MD2/MD3/MD4/LMD-W               |              |
|             | GLY107       | Heavy     | HIS6                    | MD1/MD2/MD4/MD5/MD6/LMD-W           |              |
|             | PRO108       | Heavy     | PHE4                    | LMD-W/LMD-M                         |              |
|             | PRO108       | Heavy     | HIS6                    | MD1/MD2/MD3/MD4/MD5/MD6/LMD-M       |              |
|             | ASP1         | Light     | ALA2                    | MD1/MD4/ LMD-W                      |              |
|             | ILE2         | Light     | ARG5                    | MD3                                 |              |
|             | GLN27        | Light     | ARG5                    | MD3                                 |              |
|             | TYR32        | Light     | HIS6                    | MD1/MD2/MD5/MD6/LMD-W/LMD-M         |              |
|             | TYR32        | Light     | ASP7                    | MD6                                 |              |
|             | SER91        | Light     | HIS6                    | MD1/MD2/MD3/LMD-W                   |              |
|             | <b>TYR91</b> | Light     | HIS6                    | MD4/MD5/MD6/LMD-M                   |              |
|             | TYR92        | Light     | ARG5                    | MD1/MD2/MD3/MD4/MD5/MD6/LMD-W/LMD-M |              |
|             | TYR92        | Light     | HIS6                    | MD2/MD3/MD4/MD5/MD6/LMD-W/LMD-M     |              |
|             | TYR92        | Light     | ASP7                    | LMD-M                               |              |
|             | SER93        | Light     | ALA2                    | MD1/MD3/MD4/MD5/LMD-W/LMD-M         |              |
|             | SER93        | Light     | PHE4                    | MD1/MD2/MD3/MD4/MD5/LMD-W/LMD-M     |              |
|             | SER93        | Light     | ARG5                    | MD1/MD2/MD3/MD6/LMD-W               |              |
|             | THR94        | Light     | ALA2                    | MD1/MD3/MD4/MD5/LMD-W/LMD-M         |              |
|             | THR94        | Light     | GLU3                    | MD3/MD4/MD5/LMD-W                   |              |
|             | THR94        | Light     | PHE4                    | MD1/MD2/MD4/MD5/LMD-M               |              |
|             | PRO95        | Light     | ALA2                    | MD1                                 |              |
| Salt Bridge | LYS65(NZ)    | Heavy     | GLU3(OE1)               | MD4                                 |              |
|             | LYS65(NZ)    | Heavy     | GLU3(OE2)               | MD3                                 |              |
|             | ARG105(NH1)  | Heavy     | ASP7(OD2)               | MD2                                 |              |
| ASP1(OD1)   | Heavy        | ALA2(N)   | MD1/MD4/LMD-W           | 2.69 / 2.73 / 2.67                  |              |
| LYS57(NZ)   | Heavy        | GLU3(OE1) | MD6                     | 2.77                                |              |
| TYR59(OH)   | Heavy        | GLU3(OE1) | MD6                     | 2.66                                |              |
| TYR59(OH)   | Heavy        | PHE4(N)   | MD6                     | 3.02                                |              |
| LYS65(NZ)   | Heavy        | GLU3(OE2) | MD1/MD2/MD5/LMD-W/LMD-M | 2.57 / 2.74 / 2.71 / 2.77 / 2.54    |              |



|               |             |       |           |                                     |                                                       |
|---------------|-------------|-------|-----------|-------------------------------------|-------------------------------------------------------|
|               | LYS65(NZ)   | Heavy | GLU3(OE1) | MD3                                 | 2.70                                                  |
|               | ARG105(NH1) | Heavy | ARG5(O)   | MD2/MD4                             | 2.78 / 2.68                                           |
|               | ARG105(NH1) | Heavy | ASP7(OD1) | MD4                                 | 2.93                                                  |
|               | PRO108(O)   | Heavy | HIS6(NE2) | MD1/MD2/MD3/MD4/MD5/MD6/LMD-W/LMD-M | 2.83 / 2.74 / 2.90 / 3.03 / 2.84 / 2.87 / 2.79 / 3.14 |
| Hydrogen Bond | GLN27(OE1)  | Light | ARG5(NH2) | MD3                                 | 2.87                                                  |
|               | TYR92(O)    | Light | HIS6(N)   | MD2/MD3/MD4/MD5/MD6/LMD-W/LMD-M     | 2.98 / 3.26 / 3.10 / 3.18 / 2.88 / 3.18 / 2.84        |
|               | TYR92(OH)   | Light | ASP7(OD2) | LMD-M                               | 2.69                                                  |
|               | SER93(OG)   | Light | ALA2(N)   | MD1                                 | 2.70                                                  |
|               | SER93(OG)   | Light | PHE4(O)   | MD1/MD5                             | 2.79 / 2.75                                           |
|               | SER93(OG)   | Light | ARG5(NE)  | MD3                                 | 2.86                                                  |
|               | SER93(OG)   | Light | ARG5(NH1) | MD3                                 | 2.79                                                  |
|               | THR94(O)    | Light | ALA2(N)   | MD1                                 | 2.62                                                  |
|               | THR94(OG1)  | Light | GLU3(N)   | MD3/MD4                             | 3.02 / 3.22                                           |
|               | THR94(OG1)  | Light | PHE4(N)   | MD1/MD2/MD5/LMD-W/LMD-M             | 3.06 / 3.28 / 3.06 / 3.22 / 3.01                      |
|               | THE94(N)    | Light | PHE4(O)   | MD1/MD2/MD3/MD4/LMD-W/LMD-M         | 3.03 / 3.34 / 3.07 / 3.11 / 3.10 / 2.79               |

**Table S2** – Description of nonbonded interactions calculated on the Aducanumab::A $\beta$ <sub>2-7</sub> interface comprise hydrophobic, salt bridge, and hydrogen bond contacts. These interactions were determined in the representative conformations of MD2(Wild) conformational ensemble (#0-#8).

| Interaction | Adu Residue | Adu Chain | A $\beta$ Residue | Sample (MD2)               | Distance (Å) |
|-------------|-------------|-----------|-------------------|----------------------------|--------------|
|             | TRP52       | Heavy     | PHE4              | #1/#2/#4/#7/#8             |              |
|             | TYR59       | Heavy     | ALA2              | #3/#5                      |              |
|             | TYR59       | Heavy     | GLU3              | #1/#2/#8                   |              |
|             | TYR59       | Heavy     | PHE4              | #0/#1/#2/#3/#4/#5/#7       |              |
|             | LYS65       | Heavy     | GLU3              | #0/#1/#2/#3/#4/#5/#6/#7/#8 |              |
|             | ILE102      | Heavy     | HIS6              | #0/#1/#2/#3/#4/#5/#6/#7/#8 |              |
|             | ALA104      | Heavy     | ASP7              | #8                         |              |
|             | ARG105      | Heavy     | PHE4              | #2/#3/#4/#5/#7/#8          |              |
|             | ARG105      | Heavy     | ARG5              | #2/#3#7                    |              |
|             | ARG105      | Heavy     | HIS6              | #3/#7                      |              |
|             | ARG105      | Heavy     | ASP7              | #2/#5/#7                   |              |
|             | GLY107      | Heavy     | PHE4              | #0/#1/#2/#5/#7/#8          |              |
|             | GLY107      | Heavy     | HIS6              | #0/#1/#2/#3/#4/#5/#6/#7/#8 |              |
| Hydrophobic | PRO108      | Heavy     | PHE4              | #2                         |              |
|             | PRO108      | Heavy     | HIS6              | #0/#1/#2/#3/#4/#6/#7/#8    |              |
|             | ASP1        | Light     | ALA2              | #0/#1/#2/#4                |              |
|             | TYR32       | Light     | HIS6              | #0/#1/#2/#3/#4/#5/#6/#8    |              |
|             | SER91       | Light     | HIS6              | #0/#1/#2/#3/#4/#5/#6/#7/#8 |              |
|             | TYR92       | Light     | ARG5              | #0/#1/#2/#3/#4/#5/#6/#7/#8 |              |
|             | TYR92       | Light     | HIS6              | #1/#2/#3/#4/#5/#6/#7/#8    |              |
|             | TYR92       | Light     | ASP7              | #3/#4                      |              |
|             | SER93       | Light     | ALA2              | #0/#1/#7                   |              |
|             | SER93       | Light     | PHE4              | #0/#1/#2/#3/#4/#5/#6/#7/#8 |              |



|               |             |       |           |                            |                                              |
|---------------|-------------|-------|-----------|----------------------------|----------------------------------------------|
|               | SER93       | Light | ARG5      | #0/#3/#4/#6/#7/#8          |                                              |
|               | THR94       | Light | ALA2      | #0/#1/#2/#4/#7/#8          |                                              |
|               | THR94       | Light | GLU3      | #1/#2/#3/#4/#5/#6/#7/#8    |                                              |
|               | THR94       | Light | PHE4      | #0/#1/#3/#4/#5/#7          |                                              |
|               | PRO95       | Light | GLU3      | #3                         |                                              |
| Salt Bridge   | LYS65(NZ)   | Heavy | GLU3(OE1) | #2                         |                                              |
|               | ARG105(NH1) | Heavy | ASP7(OD2) | #3                         |                                              |
|               | ARG105(NH2) | Heavy | ASP7(OD1) | #0                         |                                              |
| Hydrogen Bond | ASP1(OD1)   | Heavy | ALA2(N)   | #0/#5                      | 2.67/2.66                                    |
|               | ASP1(OD2)   | Heavy | ALA2(N)   | #1/#2                      | 2.64/2.71                                    |
|               | LYS65(NZ)   | Heavy | GLU3(OE2) | #3/#6/#7                   | 2.63/2.72/2.68                               |
|               | LYS65(NZ)   | Heavy | GLU3(OE1) | #0/#1/#4/#5/#7             | 2.70/2.65/2.57/2.65/2.60                     |
|               | ARG105(NH1) | Heavy | ARG5(O)   | #2/#3/#7                   | 2.64/2.71/2.87                               |
|               | ARG105(NH1) | Heavy | ASP7(OD2) | #5                         | 2.71                                         |
|               | ARG105(NH2) | Heavy | ASP7(OD2) | #2                         | 2.87                                         |
|               | ARG105(NE)  | Heavy | ASP7(OD1) | #5/#7                      | 2.97/2.88                                    |
|               | PRO108(O)   | Heavy | HIS6(NE2) | #0/#1/#2/#3/#4/#5/#6/#7/#8 | 2.64/2.75/2.85/2.64/2.63/3.02/2.70/2.68/2.96 |
|               | GLN27(OE1)  | Light | ARG5(NH1) | #3                         | 3.06                                         |
|               | TYR92(OH)   | Light | ARG5(NH2) | #6                         | 3.01                                         |
|               | TYR92(O)    | Light | HIS6(N)   | #0/#1/#2/#3/#4/#5/#6/#7/#8 | 3.03/3.13/2.94/2.89/3.31/3.05/3.33/2.94/3.32 |
|               | TYR92(OH)   | Light | ASP7(OD1) | #4                         | 3.18                                         |
|               | THR94(OG1)  | Light | GLU3(OE1) | #3/#5/#6                   | 2.59/2.68/2.79                               |
|               | THR94(OG1)  | Light | PHE4(N)   | #0/#1/#2/#3/#4/#5/#6/#7/#8 | 3.25/3.31/3.27/2.95/2.88/2.92/3.05/3.00/3.11 |
|               | THR94(N)    | Light | PHE4(O)   | #0/#1/#2/#3/#4/#5/#6/#7    | 2.91/3.31/3.02/3.02/2.89/3.05/2.99/2.89      |

**Table S3** – Description of nonbonded interactions calculated on the Aducanumab::A $\beta$ <sub>2-7</sub> interface comprise hydrophobic, salt bridge, and hydrogen bond contacts. These interactions were determined in the representative conformations of MD6(Wild) conformational ensemble (#0-#7).

| Interaction | Adu Residue | Adu Chain | A $\beta$ Residue | Sample (MD6)            | Distance (Å) |
|-------------|-------------|-----------|-------------------|-------------------------|--------------|
|             | TRP52       | Heavy     | PHE4              | #1/#2/#3/#4/#6/#7       |              |
|             | LYS57       | Heavy     | ALA2              | #3                      |              |
|             | LYS57       | Heavy     | GLU3              | #0/#3/#6                |              |
|             | LYS57       | Heavy     | PHE4              | #0/#1/#2/#3/#6          |              |
|             | TYR59       | Heavy     | GLU3              | #0/#3/#4/#6             |              |
|             | TYR59       | Heavy     | PHE4              | #1/#2/#4/#5             |              |
|             | ILE102      | Heavy     | HIS6              | #0/#1/#2/#3/#4/#5/#6/#7 |              |
|             | ARG105      | Heavy     | PHE4              | #0/#2/#3/#4/#6          |              |
|             | ARG105      | Heavy     | ARG5              | #1/#3                   |              |
|             | ARG105      | Heavy     | HIS6              | #5                      |              |
|             | ARG105      | Heavy     | ASP7              | #1/#2/#4/#5             |              |
|             | GLY107      | Heavy     | PHE4              | #4                      |              |

|               |             |       |           |                         |                                             |
|---------------|-------------|-------|-----------|-------------------------|---------------------------------------------|
| Hydrophobic   | GLY107      | Heavy | HIS6      | #0/#1/#2/#3/#4/#5/#6/#7 |                                             |
|               | PRO108      | Heavy | HIS6      | #0/#1/#2/#3/#4/#5/#6/#7 |                                             |
|               | TYR32       | Light | HIS6      | #0/#1/#2/#3/#4/#5/#6/#7 |                                             |
|               | TYR32       | Light | ASP7      | #0/#1/#2/#3/#5/#6       |                                             |
|               | TYR91       | Light | HIS6      | #0/#1/#2/#3/#4/#5/#6/#7 |                                             |
|               | TYR92       | Light | ARG5      | #1/#2/#3/#4/#5/#7       |                                             |
|               | TYR92       | Light | HIS6      | #1/#2/#3/#4/#6/#7       |                                             |
|               | TYR92       | Light | ASP7      | #6                      |                                             |
|               | SER93       | Light | ALA2      | #1                      |                                             |
|               | SER93       | Light | GLU3      | #2/#5                   |                                             |
|               | SER93       | Light | PHE4      | #4/#7                   |                                             |
|               | SER93       | Light | ARG5      | #4/#7                   |                                             |
|               | THR94       | Light | GLU3      | #7                      |                                             |
|               | THR94       | Light | PHE4      | #7                      |                                             |
| Salt Bridge   | LYS57(NZ)   | Heavy | GLU3(OE2) | #0                      |                                             |
|               | LYS57(NZ)   | Heavy | GLU3(OE1) | #3/#6                   | 2.91/2.68                                   |
|               | TYR59(OH)   | Heavy | GLU3(OE1) | #0/#6                   | 2.74/2.44                                   |
|               | TYR59(OH)   | Heavy | GLU3(OE2) | #3                      | 2.56                                        |
|               | TYR59(OH)   | Heavy | PHE4(N)   | #0/#3/#6                | 3.30/3.05/3.20                              |
|               | ARG105(NH1) | Heavy | ARG5(O)   | #1/#2/#4/#5             | 2.72/3.04/3.33/2.93                         |
|               | ARG105(NE)  | Heavy | ASP7(OD1) | #4                      | 2.95                                        |
|               | ARG105(NH1) | Heavy | ASP7(OD1) | #1/#5                   | 2.79/2.66                                   |
|               | ARG105(NH1) | Heavy | ASP7(OD2) | #1/#2/#4                | 2.72/2.85/2.92                              |
|               | ARG105(NH2) | Heavy | ASP7(OD2) | #2/#5                   | 2.82/2.77                                   |
| Hydrogen Bond | PRO108(O)   | Heavy | HIS6(NE2) | #0/#1/#2/#3/#4/#5/#6/#7 | 3.01/2.83/2.79/2.87<br>/2.63/2.90/2.98/2.96 |
|               | TYR32(OH)   | Light | ASP7(O)   | #1/#3                   | 2.57/2.91                                   |
|               | TYR32(OH)   | Light | ASP7(OXT) | #0/#2/#5/#6             | 2.63/2.84/2.63/2.76                         |
|               | TYR92(OH)   | Light | ARG5(NH1) | #4                      | 2.88                                        |
|               | TYR92(O)    | Light | HIS6(N)   | #3/#4/#6/#7             | 3.25/2.93/3.25/2.97                         |
|               | TYR92(OH)   | Light | ASP7(O)   | #6                      | 2.73                                        |
|               | SER93(OG)   | Light | GLU3(OE1) | #1/#2                   | 2.91/2.77                                   |
|               | SER93(OG)   | Light | GLU3(OE2) | #5                      | 2.89                                        |
|               | SER93(OG)   | Light | PHE4(O)   | #7                      | 2.80                                        |
|               | THR94(OG1)  | Light | PHE4(N)   | #4                      | 3.23                                        |
|               | THR94(N)    | Light | PHE4(O)   | #4                      | 3.07                                        |

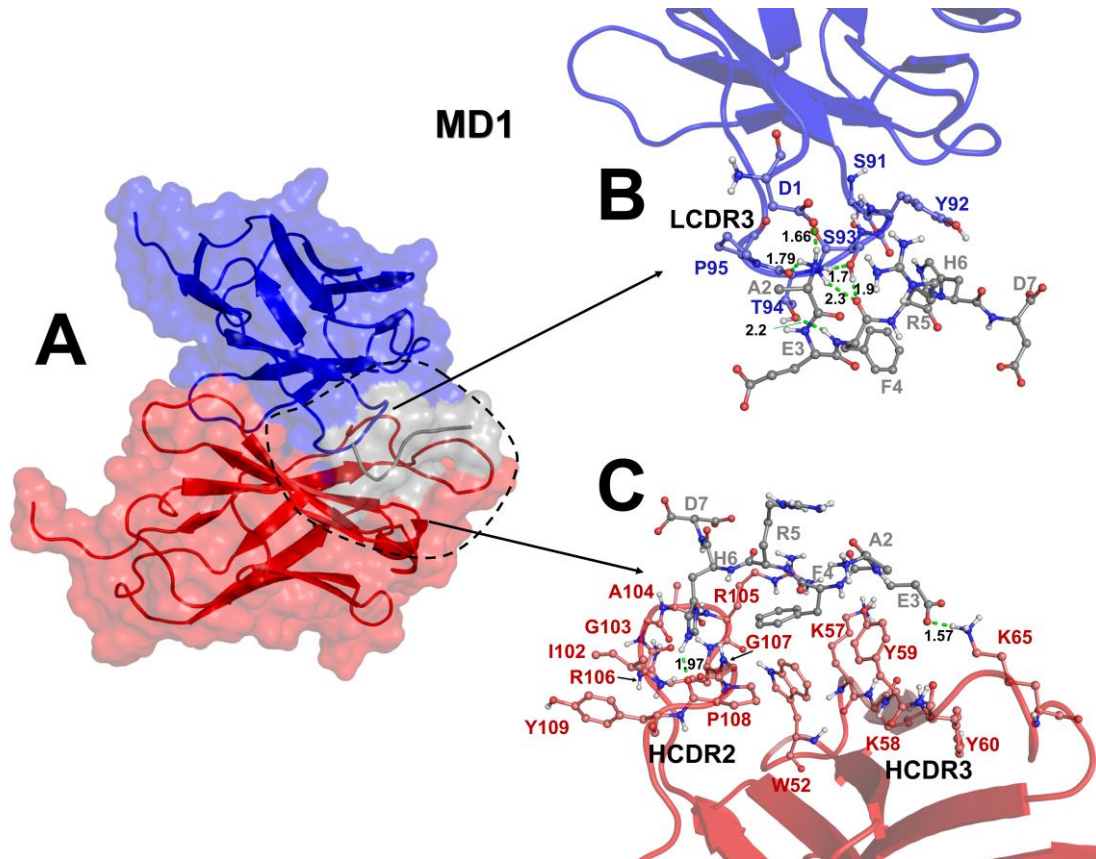

**Figure S6** – Tridimensional illustration of final structural conformation MD1 of Aducanumab::A $\beta_{2-7}$ . (A) Overview of the shortened version of Aducanumab bound to A $\beta_{2-7}$ . (B) Critical contacts between LCDR3 and A $\beta_{2-7}$ . (C) Critical contacts of A $\beta_{2-7}$  with HCDR2 and HCDR3. Aducanumab's heavy chain and light chain are colored in red and blue, respectively, and A $\beta_{2-7}$  is colored in grey.

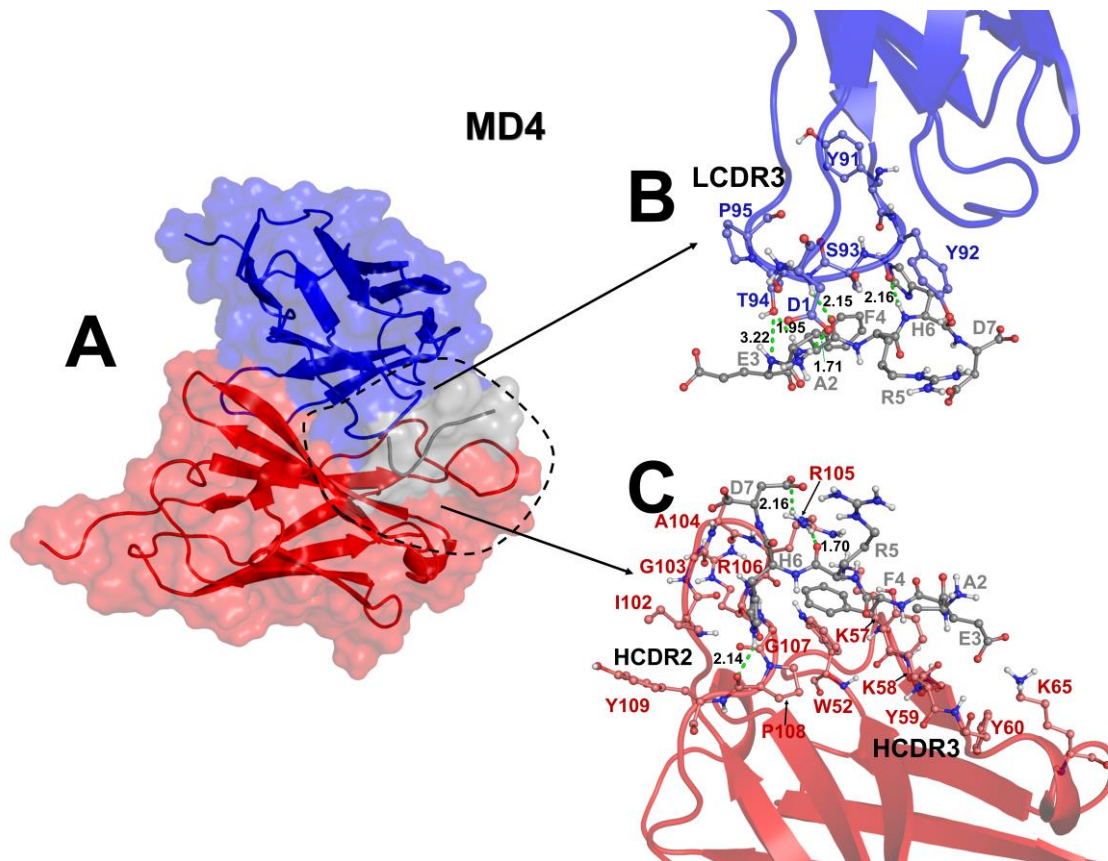

**Figure S7** – Tridimensional illustration of final structural conformation MD1 of Aducanumab::A $\beta_{2-7}$ . (A) Overview of the shortened version of Aducanumab bound to A $\beta_{2-7}$ . (B) Critical contacts between LCDR3 and A $\beta_{2-7}$ . (C) Critical contacts of A $\beta_{2-7}$  with HCDR2 and HCDR3. Aducanumab's heavy chain and light chain are colored in red and blue, respectively, and A $\beta_{2-7}$  is colored in grey.

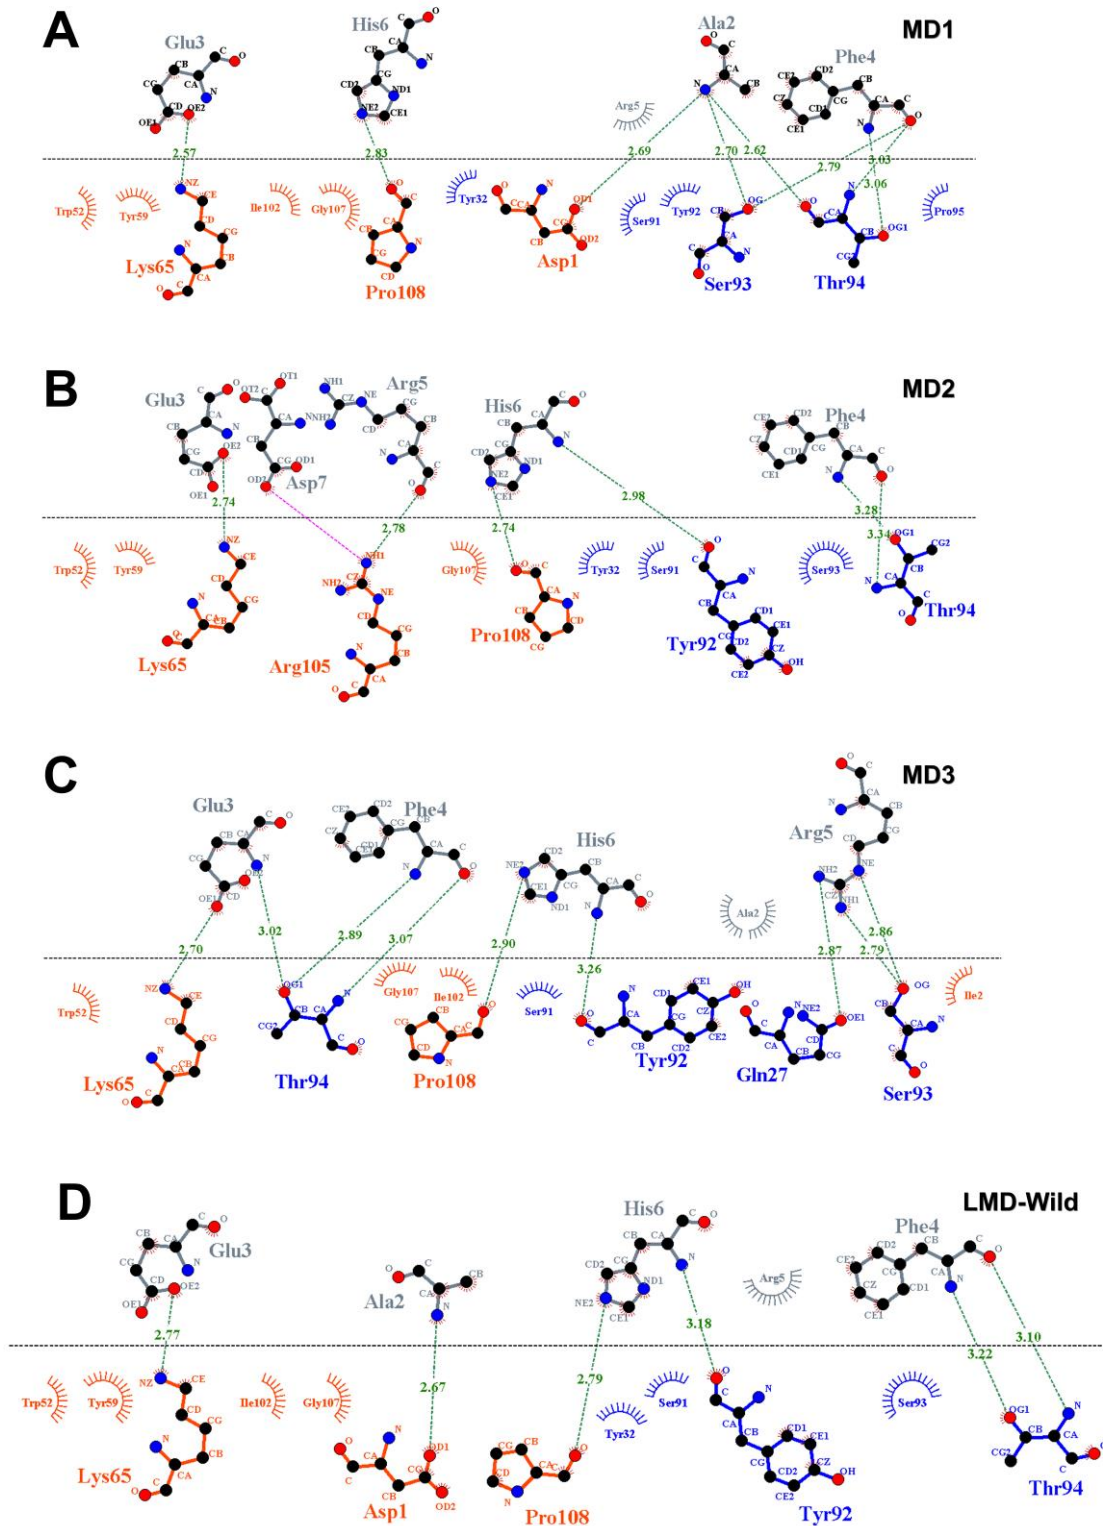

**Figure S8** – Schematic representation of hydrogen bonds (dashed green lines), salt bridges (dashed magenta lines) and hydrophobic interactions (spoked arcs) detected between Aβ<sub>2-7</sub> (grey residues) and Heavy chain (orange residues) or Light chain (blue residues). These interactions were detected on FC (A) MD1, (B) MD2, (C) MD3, and (D) LMD-Wild.



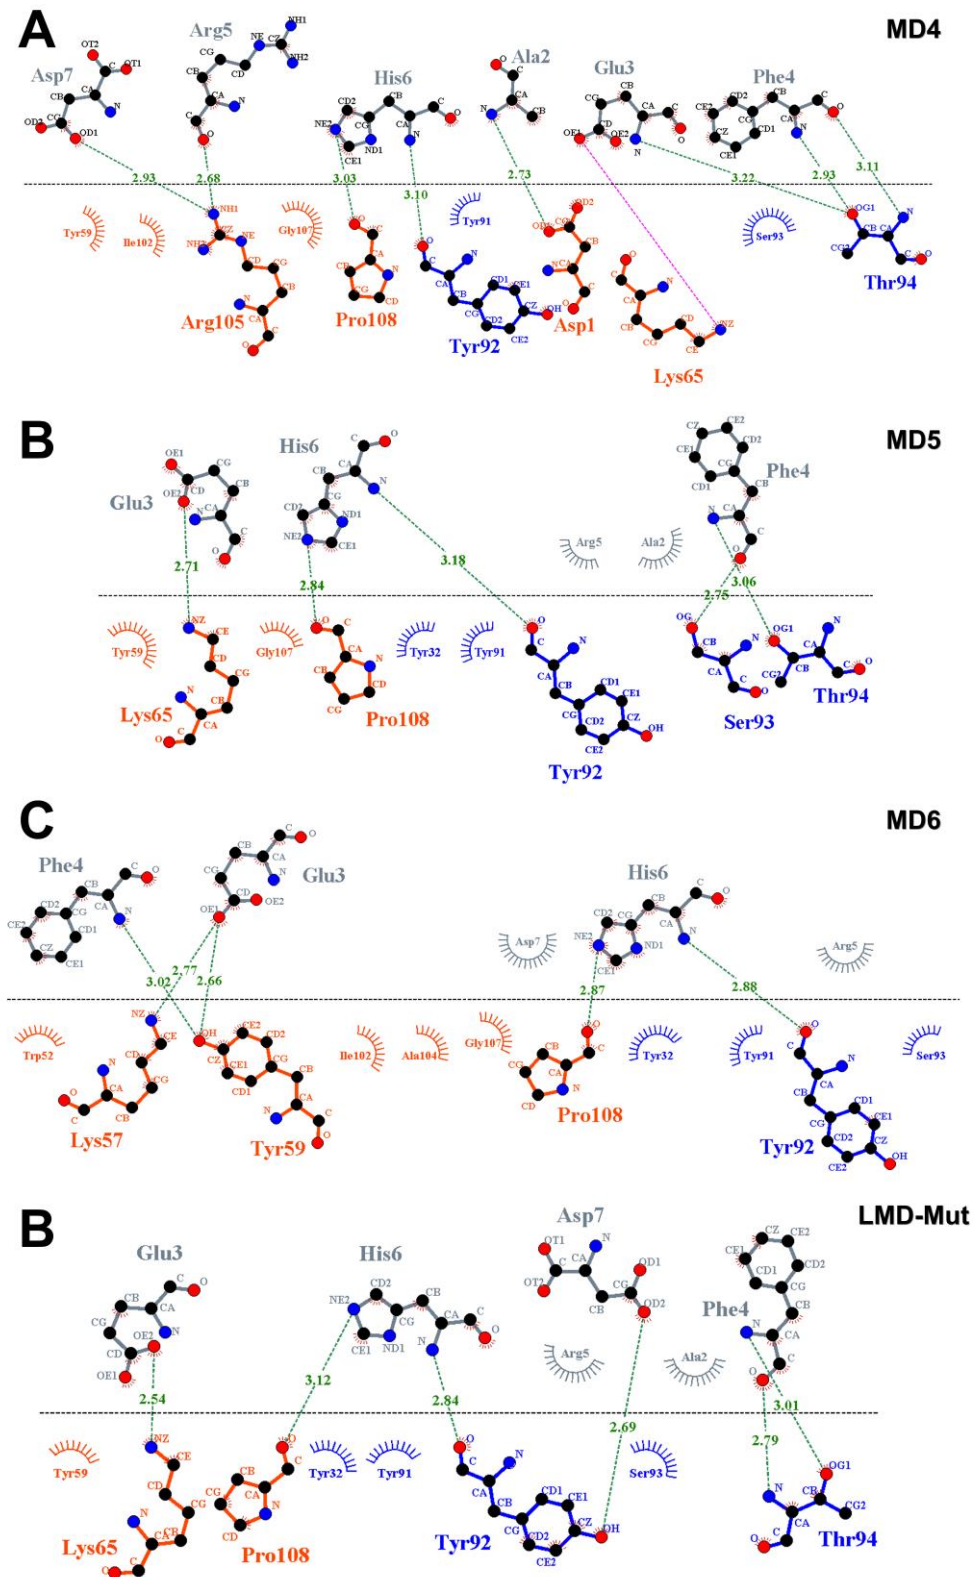

**Figure S9** – Schematic representation of hydrogen bonds (dashed green lines), salt bridges (dashed magenta lines) and hydrophobic interactions (spoked arcs) detected between A $\beta_{2-7}$  (grey residues) and Heavy chain (orange residues) or Light chain (blue residues). These interactions were detected on FC (A) MD4, (B) MD5, and (C) MD6.

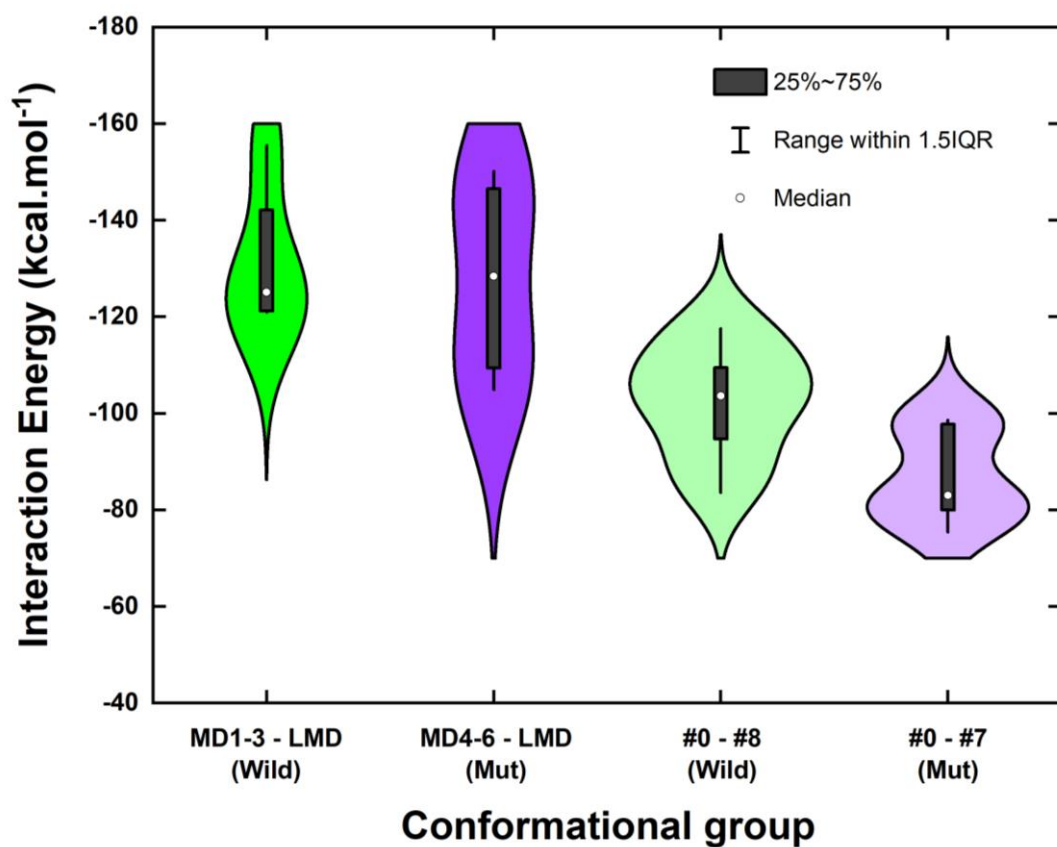

**Figure S10** – Violin plot representing the distribution of interaction energy values within distinct conformational ensembles, namely Wild-FC, Mut-FC, Wild-RC, and Mut-RC. The distributions of values derived from wild and mutated complexes are colored in green and purple, respectively.



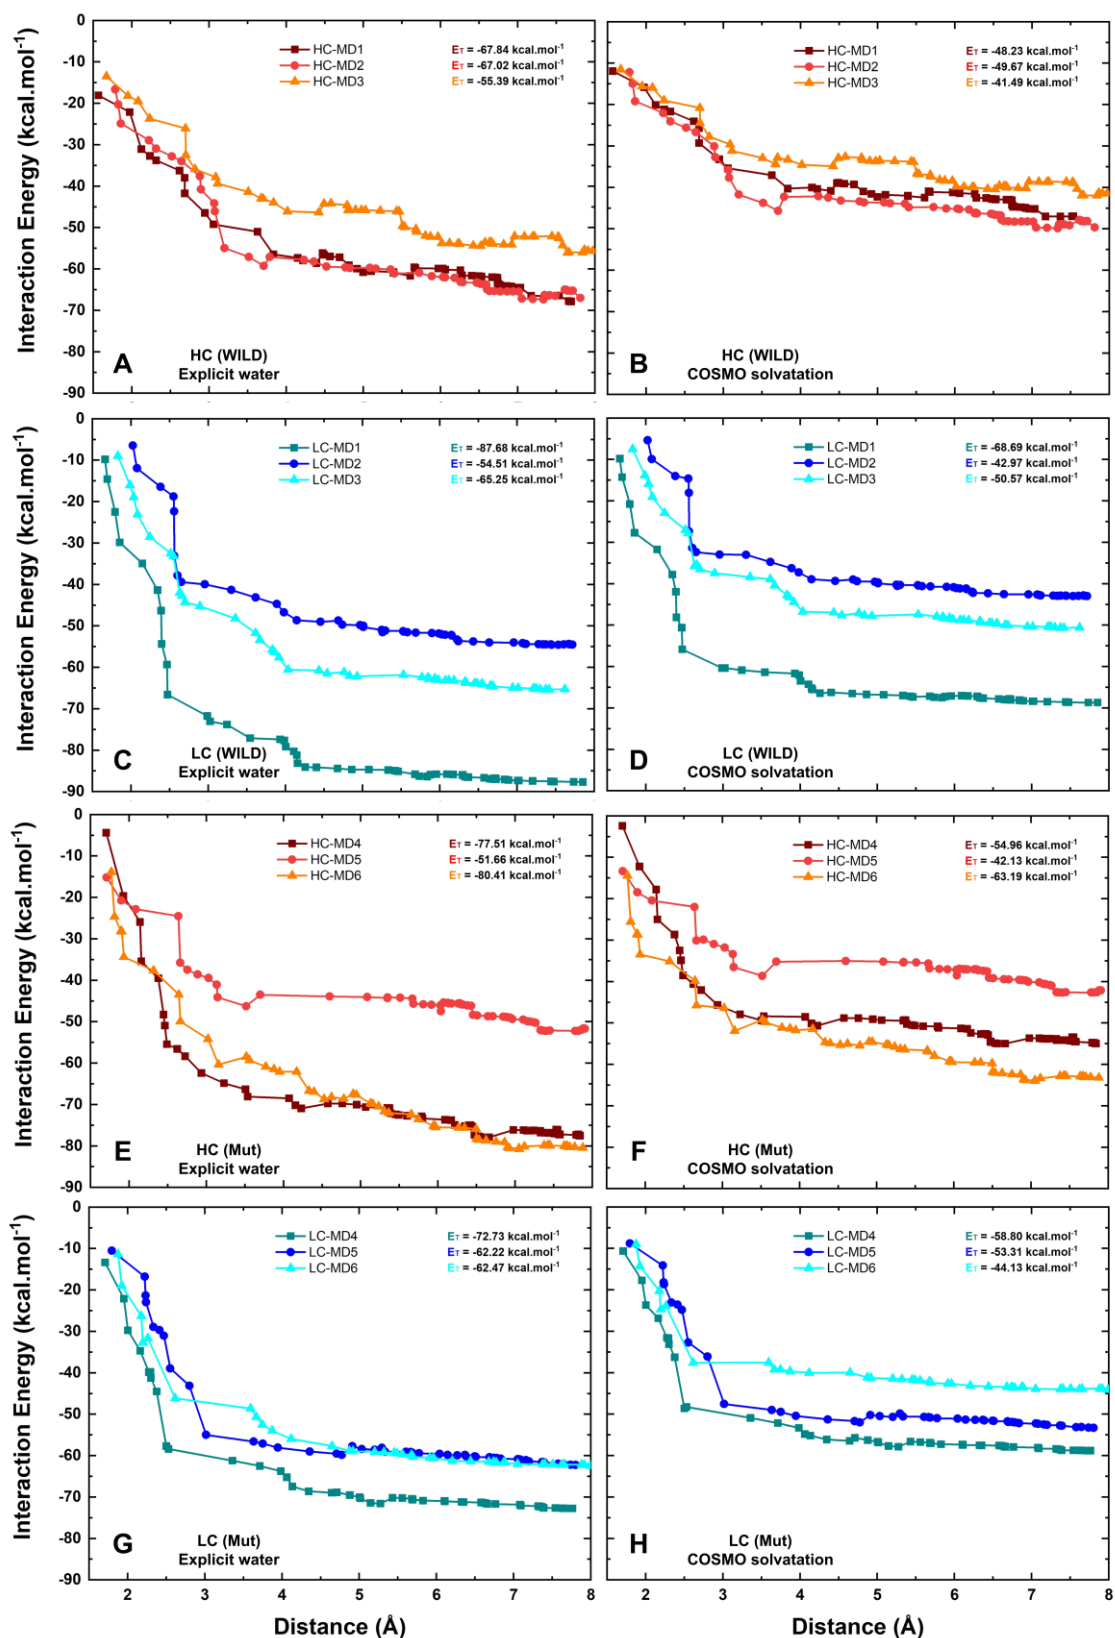

**Figure S11** – Impact of explicit solvation on the calculation of interaction energy. Sum of the interaction energy as the interaction radius increases on surfaces (A-B) HC::A $\beta$ <sub>2-7</sub> and (C-D) LC::A $\beta$ <sub>2-7</sub> of FC MD1-MD3. Same for (E-F) HC::A $\beta$ <sub>2-7</sub> and (G-H) LC::A $\beta$ <sub>2-7</sub> of FC MD1-MD3. The charts displayed in the left and right columns illustrate the

quantum biochemistry results obtained through the employment of an explicit water and COSMO solvation model, respectively.

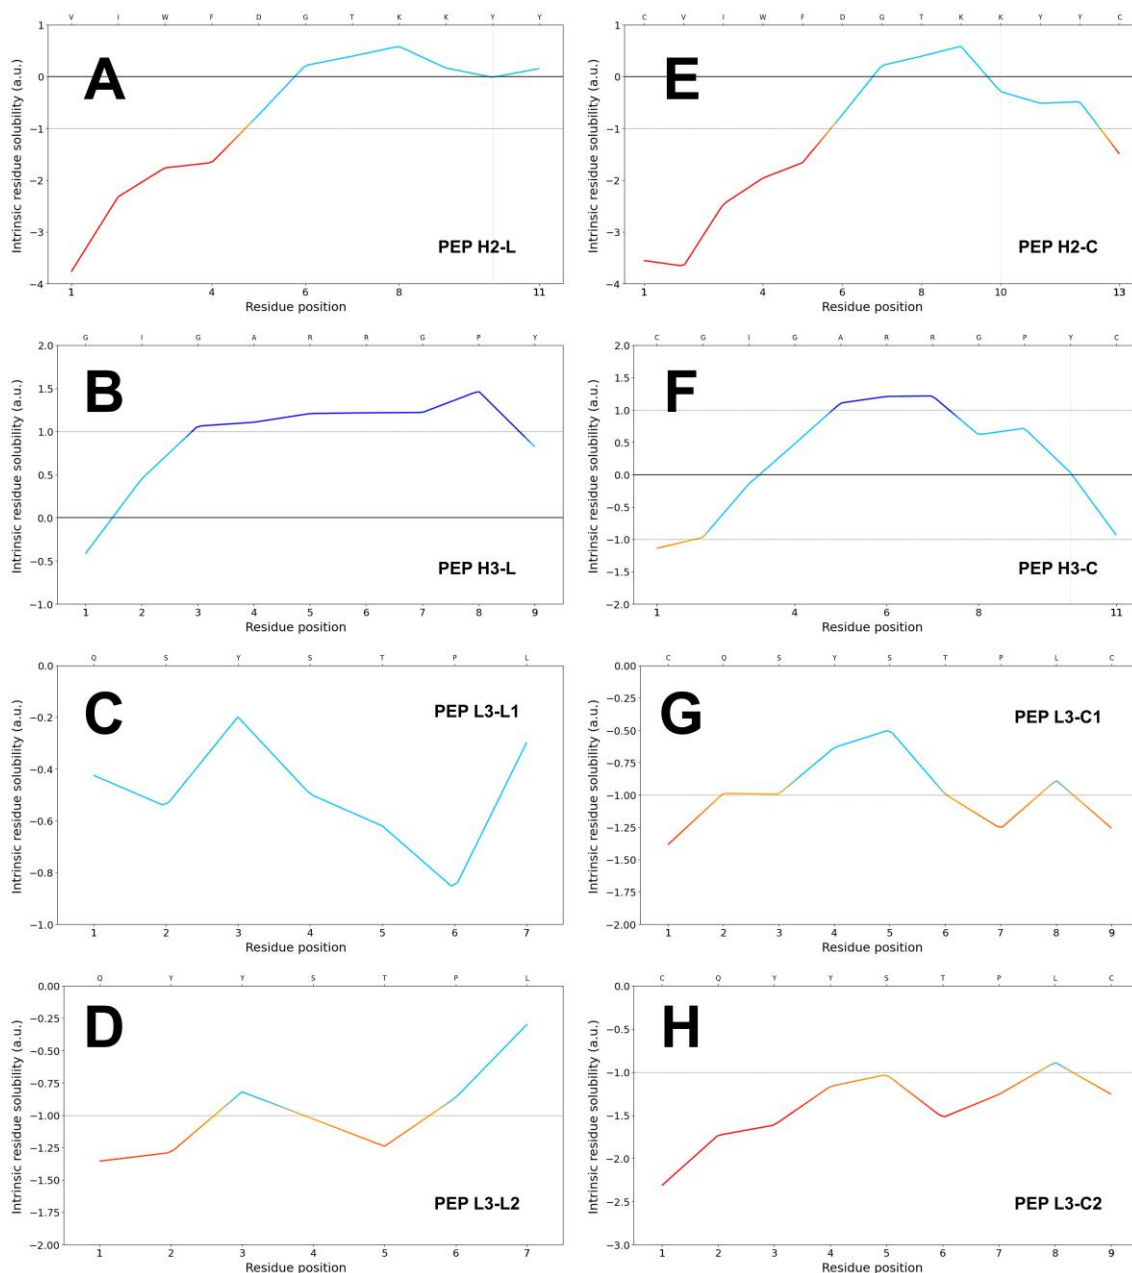

**Figure S12** – Solubility of mimetic peptides (A) PEP-H2-L, (B) PEP-H3-L, (C) PEP-L3-L1, (D) PEP-L3-L2, (E) PEP-H2-C, (F) PEP-H3-C, (G) PEP-L3-C1, and (H) PEP-L3-C2 based on its amino acid sequences calculated using CAMSOL. Values higher than -1.0 suggest reasonable solubility.

**Table S4** – Quantum biochemistry details of FC MD1.

| <b>Adu Residue</b> | <b>Adu Chain</b> | <b>A<math>\beta</math> Residue</b> | <b>Distance (Å)</b> | <b>Interaction Energy (kcal/mol)</b> | <b>Adu Residue Charge</b> | <b>A<math>\beta</math> Residue Charge</b> | <b>Adu Atom</b> | <b>A<math>\beta</math> Atom</b> |
|--------------------|------------------|------------------------------------|---------------------|--------------------------------------|---------------------------|-------------------------------------------|-----------------|---------------------------------|
| LYS65              | Heavy            | GLU3                               | 1.57                | -18.05                               | 1                         | -1                                        | HZ1             | OE2                             |
| PRO108             | Heavy            | HIS6                               | 1.97                | -4.05                                | 0                         | 0                                         | O               | HE2                             |
| TYR59              | Heavy            | GLU3                               | 2.12                | -8.95                                | 0                         | -1                                        | HE1             | HB2                             |
| GLY107             | Heavy            | HIS6                               | 2.24                | -1.63                                | 0                         | 0                                         | O               | HE1                             |
| GLY107             | Heavy            | PHE4                               | 2.32                | -1.07                                | 0                         | 0                                         | HA1             | HE1                             |
| ILE102             | Heavy            | HIS6                               | 2.62                | -2.48                                | 0                         | 0                                         | HG23            | HE2                             |
| PRO108             | Heavy            | PHE4                               | 2.68                | -1.73                                | 0                         | 0                                         | HD1             | HE1                             |
| TRP52              | Heavy            | PHE4                               | 2.69                | -3.77                                | 0                         | 0                                         | HZ2             | CZ                              |
| TYR59              | Heavy            | PHE4                               | 2.95                | -4.71                                | 0                         | 0                                         | CE2             | HB1                             |
| ARG105             | Heavy            | PHE4                               | 3.06                | -2.76                                | 1                         | 0                                         | HB1             | HZ                              |
| TYR109             | Heavy            | HIS6                               | 3.63                | -1.78                                | 0                         | 0                                         | HA              | HE2                             |
| ARG105             | Heavy            | ASP7                               | 3.84                | -5.47                                | 1                         | -2                                        | HD2             | OD2                             |
| TYR60              | Heavy            | GLU3                               | 4.15                | -0.85                                | 0                         | -1                                        | O               | OE2                             |
| ARG106             | Heavy            | HIS6                               | 4.22                | -0.63                                | 1                         | 0                                         | C               | HE1                             |
| LYS57              | Heavy            | PHE4                               | 4.39                | -0.63                                | 1                         | 0                                         | HG1             | HE2                             |
| ASP62              | Heavy            | GLU3                               | 4.47                | 2.40                                 | -1                        | -1                                        | OD1             | OE2                             |
| ARG106             | Heavy            | PHE4                               | 4.49                | -0.40                                | 1                         | 0                                         | C               | HZ                              |
| GLY103             | Heavy            | HIS6                               | 4.57                | -0.40                                | 0                         | 0                                         | HA1             | HE1                             |
| GLY101             | Heavy            | HIS6                               | 4.69                | -0.20                                | 0                         | 0                                         | HA2             | HE1                             |
| ASP62              | Heavy            | ALA2                               | 4.81                | -1.92                                | -1                        | 1                                         | OD2             | HB2                             |
| ALA104             | Heavy            | ASP7                               | 4.92                | -0.82                                | 0                         | -2                                        | HB3             | OD2                             |
| ARG105             | Heavy            | HIS6                               | 5.00                | -0.87                                | 1                         | 0                                         | HB1             | HA                              |
| ARG105             | Heavy            | ARG5                               | 5.10                | 0.28                                 | 1                         | 1                                         | HH22            | O                               |
| VAL50              | Heavy            | PHE4                               | 5.39                | -0.22                                | 0                         | 0                                         | HG13            | HB2                             |
| ILE102             | Heavy            | PHE4                               | 5.39                | -0.18                                | 0                         | 0                                         | O               | HZ                              |
| GLY103             | Heavy            | ASP7                               | 5.61                | -0.73                                | 0                         | -2                                        | HA1             | HN                              |
| LYS65              | Heavy            | ALA2                               | 5.66                | 2.04                                 | 1                         | 1                                         | HZ2             | HB3                             |
| TRP52              | Heavy            | HIS6                               | 5.67                | -0.18                                | 0                         | 0                                         | HZ2             | HE1                             |
| TRP47              | Heavy            | PHE4                               | 5.97                | -0.11                                | 0                         | 0                                         | HH2             | HB2                             |
| THR61              | Heavy            | GLU3                               | 6.03                | 0.02                                 | 0                         | -1                                        | HA              | OE2                             |
| PRO108             | Heavy            | ARG5                               | 6.06                | -0.28                                | 0                         | 1                                         | HD1             | HA                              |
| TRP52              | Heavy            | ARG5                               | 6.26                | -0.15                                | 0                         | 1                                         | HH2             | HN                              |
| ARG105             | Heavy            | GLU3                               | 6.28                | -1.21                                | 1                         | -1                                        | HH21            | O                               |
| GLY103             | Heavy            | PHE4                               | 6.28                | -0.05                                | 0                         | 0                                         | HA1             | HZ                              |
| TRP47              | Heavy            | GLU3                               | 6.40                | -0.05                                | 0                         | -1                                        | HZ3             | OE2                             |
| LYS58              | Heavy            | PHE4                               | 6.47                | -0.23                                | 1                         | 0                                         | O               | HB1                             |
| TYR59              | Heavy            | ALA2                               | 6.50                | 0.13                                 | 0                         | 1                                         | HD1             | HB2                             |
| GLY107             | Heavy            | ARG5                               | 6.52                | -0.11                                | 0                         | 1                                         | HA1             | HA                              |
| GLY107             | Heavy            | ASP7                               | 6.53                | 0.00                                 | 0                         | -2                                        | HN              | HN                              |

|        |       |      |      |       |    |    |      |      |
|--------|-------|------|------|-------|----|----|------|------|
| ALA104 | Heavy | HIS6 | 6.67 | -0.16 | 0  | 0  | N    | HE1  |
| THR61  | Heavy | ALA2 | 6.71 | -0.02 | 0  | 1  | HA   | HB2  |
| TYR110 | Heavy | HIS6 | 6.74 | -0.15 | 0  | 0  | N    | HE2  |
| LYS58  | Heavy | GLU3 | 6.74 | -1.13 | 1  | -1 | O    | OE1  |
| TYR59  | Heavy | ARG5 | 6.74 | -0.15 | 0  | 1  | OH   | HN   |
| ASP99  | Heavy | HIS6 | 6.75 | -0.24 | -1 | 0  | OD2  | HE2  |
| TYR60  | Heavy | ALA2 | 6.76 | -0.25 | 0  | 1  | O    | HB2  |
| ALA104 | Heavy | PHE4 | 6.77 | 0.00  | 0  | 0  | C    | HZ   |
| ILE102 | Heavy | ASP7 | 6.85 | -0.18 | 0  | -2 | O    | HN   |
| TYR109 | Heavy | PHE4 | 6.91 | -0.10 | 0  | 0  | N    | HE1  |
| TRP47  | Heavy | ALA2 | 6.92 | -0.10 | 0  | 1  | HZ3  | HB2  |
| LYS65  | Heavy | PHE4 | 6.96 | -0.21 | 1  | 0  | HZ1  | HN   |
| GLY101 | Heavy | PHE4 | 7.03 | -0.03 | 0  | 0  | HA2  | HE1  |
| ARG106 | Heavy | ASP7 | 7.17 | -1.97 | 1  | -2 | HN   | HN   |
| TRP52  | Heavy | GLU3 | 7.37 | -0.02 | 0  | -1 | HH2  | C    |
| ARG100 | Heavy | HIS6 | 7.51 | 0.09  | 1  | 0  | O    | HE1  |
| VAL50  | Heavy | GLU3 | 7.53 | 0.01  | 0  | -1 | HG11 | HB1  |
| LYS57  | Heavy | GLU3 | 7.66 | -1.32 | 1  | -1 | HD2  | HB2  |
| TYR60  | Heavy | PHE4 | 7.67 | -0.09 | 0  | 0  | HN   | HB1  |
| HIS35  | Heavy | PHE4 | 7.69 | -0.03 | 0  | 0  | HE1  | HD1  |
| ASP1   | Light | ALA2 | 1.66 | -9.78 | 0  | 1  | OD1  | H1   |
| SER93  | Light | ALA2 | 1.69 | -4.78 | 0  | 1  | OG   | H2   |
| THR94  | Light | ALA2 | 1.79 | -7.93 | 0  | 1  | O    | H3   |
| SER93  | Light | PHE4 | 1.86 | -7.34 | 0  | 0  | HG1  | O    |
| THR94  | Light | PHE4 | 2.15 | -5.08 | 0  | 0  | OG1  | HN   |
| SER93  | Light | ARG5 | 2.34 | -6.43 | 0  | 1  | HB2  | HB2  |
| PRO95  | Light | ALA2 | 2.39 | -4.94 | 0  | 1  | HD2  | HB2  |
| TYR92  | Light | ARG5 | 2.40 | -8.04 | 0  | 1  | HH   | HD1  |
| TYR92  | Light | HIS6 | 2.47 | -5.00 | 0  | 0  | HA   | HD2  |
| THR94  | Light | GLU3 | 2.47 | -7.25 | 0  | -1 | HG1  | HB1  |
| TYR32  | Light | HIS6 | 2.99 | -5.16 | 0  | 0  | HE2  | HB1  |
| GLN27  | Light | ARG5 | 3.02 | -1.29 | 0  | 1  | HE22 | HH22 |
| SER91  | Light | HIS6 | 3.24 | -0.75 | 0  | 0  | O    | HD2  |
| ASP1   | Light | ARG5 | 3.54 | -3.28 | 0  | 1  | OD1  | HH11 |
| ILE2   | Light | ALA2 | 3.93 | -0.30 | 0  | 1  | HG11 | H1   |
| ILE2   | Light | ARG5 | 3.98 | -0.29 | 0  | 1  | HD2  | HH21 |
| TYR92  | Light | PHE4 | 4.01 | -1.49 | 0  | 0  | O    | O    |
| SER93  | Light | HIS6 | 4.11 | -1.11 | 0  | 0  | HA   | HN   |
| THR94  | Light | ARG5 | 4.15 | -0.90 | 0  | 1  | HN   | HA   |
| TYR32  | Light | ASP7 | 4.16 | -1.98 | 0  | -2 | HH   | OT2  |
| PRO95  | Light | GLU3 | 4.26 | -0.93 | 0  | -1 | HD2  | HN   |
| SER93  | Light | GLU3 | 4.40 | -0.05 | 0  | -1 | HG1  | N    |
| LEU96  | Light | PHE4 | 4.67 | -0.27 | 0  | 0  | HD22 | HD1  |
| SER30  | Light | HIS6 | 4.86 | -0.26 | 0  | 0  | HB2  | HB1  |
| GLN90  | Light | ALA2 | 5.08 | -0.01 | 0  | 1  | HE22 | H3   |
| SER91  | Light | PHE4 | 5.33 | -0.11 | 0  | 0  | O    | HE1  |
| PRO95  | Light | PHE4 | 5.42 | -0.16 | 0  | 0  | N    | HN   |
| ILE29  | Light | HIS6 | 5.46 | -0.19 | 0  | 0  | O    | HD2  |

|       |       |      |      |       |   |    |      |      |
|-------|-------|------|------|-------|---|----|------|------|
| TYR92 | Light | ASP7 | 5.68 | -0.68 | 0 | -2 | HE1  | N    |
| GLN27 | Light | ALA2 | 5.73 | -0.46 | 0 | 1  | OE1  | H1   |
| THR94 | Light | HIS6 | 5.84 | -0.09 | 0 | 0  | HN   | HN   |
| TYR92 | Light | ALA2 | 5.88 | 0.45  | 0 | 1  | HE2  | H2   |
| SER91 | Light | ARG5 | 5.95 | 0.13  | 0 | 1  | O    | HA   |
| ASP1  | Light | GLU3 | 6.09 | 0.00  | 0 | -1 | OD1  | N    |
| LEU96 | Light | ARG5 | 6.17 | -0.06 | 0 | 1  | HD22 | HA   |
| LEU96 | Light | ALA2 | 6.29 | -0.11 | 0 | 1  | HD21 | H3   |
| LEU96 | Light | HIS6 | 6.30 | -0.10 | 0 | 0  | HD22 | HE2  |
| SER28 | Light | ARG5 | 6.33 | -0.39 | 0 | 1  | O    | HH22 |
| GLN90 | Light | PHE4 | 6.37 | -0.07 | 0 | 0  | HE22 | O    |
| TYR32 | Light | ARG5 | 6.57 | -0.16 | 0 | 1  | HD2  | HB1  |
| ILE29 | Light | ARG5 | 6.65 | -0.23 | 0 | 1  | HG21 | HH22 |
| ILE2  | Light | PHE4 | 6.69 | -0.07 | 0 | 0  | HD2  | O    |
| SER30 | Light | ASP7 | 6.71 | 0.23  | 0 | -2 | HB1  | OT1  |
| SER30 | Light | ARG5 | 6.72 | -0.06 | 0 | 1  | HB2  | HB1  |
| PRO95 | Light | ARG5 | 6.73 | -0.22 | 0 | 1  | HD1  | HH11 |
| ASN34 | Light | HIS6 | 6.84 | -0.03 | 0 | 0  | HD22 | HE2  |
| THR97 | Light | ALA2 | 6.84 | -0.06 | 0 | 1  | HN   | H3   |
| GLN90 | Light | HIS6 | 6.89 | -0.10 | 0 | 0  | OE1  | HD2  |
| GLN90 | Light | ARG5 | 7.01 | -0.10 | 0 | 1  | OE1  | HA   |
| ASP1  | Light | PHE4 | 7.02 | -0.03 | 0 | 0  | OD1  | O    |
| SER31 | Light | HIS6 | 7.20 | -0.09 | 0 | 0  | C    | HD2  |
| LEU33 | Light | HIS6 | 7.44 | -0.09 | 0 | 0  | N    | HD2  |
| ILE2  | Light | HIS6 | 7.48 | -0.04 | 0 | 0  | HD2  | HN   |
| TYR32 | Light | PHE4 | 7.73 | -0.07 | 0 | 0  | HB2  | HE1  |
| TYR92 | Light | GLU3 | 7.85 | -0.05 | 0 | -1 | O    | C    |

**Table S5** – Quantum biochemistry details of FC MD2.

| <b>Adu Residue</b> | <b>Adu Chain</b> | <b>A<math>\beta</math> Residue</b> | <b>Distance (Å)</b> | <b>Interaction Energy (kcal/mol)</b> | <b>Adu Residue Charge</b> | <b>A<math>\beta</math> Residue Charge</b> | <b>Adu Atom</b> | <b>A<math>\beta</math> Atom</b> |
|--------------------|------------------|------------------------------------|---------------------|--------------------------------------|---------------------------|-------------------------------------------|-----------------|---------------------------------|
| LYS65              | Heavy            | GLU3                               | 1.79                | -16.61                               | 1                         | -1                                        | HZ1             | OE2                             |
| ARG105             | Heavy            | ARG5                               | 1.82                | -3.66                                | 1                         | 1                                         | HH11            | O                               |
| PRO108             | Heavy            | HIS6                               | 1.86                | -4.59                                | 0                         | 0                                         | O               | HE2                             |
| TYR59              | Heavy            | GLU3                               | 2.22                | -4.04                                | 0                         | -1                                        | HE1             | HB2                             |
| GLY107             | Heavy            | HIS6                               | 2.31                | -2.07                                | 0                         | 0                                         | HA1             | HE1                             |
| GLY107             | Heavy            | PHE4                               | 2.52                | -1.83                                | 0                         | 0                                         | HA1             | HZ                              |
| ILE102             | Heavy            | HIS6                               | 2.64                | -1.17                                | 0                         | 0                                         | HG22            | HE1                             |
| ARG105             | Heavy            | PHE4                               | 2.88                | -3.67                                | 1                         | 0                                         | HB1             | HE2                             |
| ARG105             | Heavy            | HIS6                               | 2.90                | -3.11                                | 1                         | 0                                         | HH12            | HA                              |
| TRP52              | Heavy            | PHE4                               | 3.07                | -3.40                                | 0                         | 0                                         | HZ2             | HE2                             |
| PRO108             | Heavy            | PHE4                               | 3.08                | -1.91                                | 0                         | 0                                         | HD1             | HE1                             |
| ARG105             | Heavy            | ASP7                               | 3.20                | -8.88                                | 1                         | -2                                        | NH1             | OD2                             |
| TYR109             | Heavy            | HIS6                               | 3.51                | -2.14                                | 0                         | 0                                         | HA              | HE2                             |
| TYR59              | Heavy            | PHE4                               | 3.71                | -2.17                                | 0                         | 0                                         | CZ              | HB1                             |
| ASP62              | Heavy            | GLU3                               | 3.79                | 2.16                                 | -1                        | -1                                        | OD1             | OE2                             |

|        |       |      |      |       |    |    |      |     |
|--------|-------|------|------|-------|----|----|------|-----|
| TYR60  | Heavy | GLU3 | 4.23 | -0.68 | 0  | -1 | O    | OE2 |
| LYS57  | Heavy | PHE4 | 4.36 | -0.42 | 1  | 0  | HD1  | HD2 |
| ALA104 | Heavy | ASP7 | 4.52 | -1.23 | 0  | -2 | HB2  | OD1 |
| GLY101 | Heavy | HIS6 | 4.77 | -0.17 | 0  | 0  | HA2  | HE1 |
| ARG106 | Heavy | PHE4 | 4.82 | -0.18 | 1  | 0  | C    | HZ  |
| ARG106 | Heavy | HIS6 | 5.09 | 0.05  | 1  | 0  | C    | HE1 |
| VAL50  | Heavy | PHE4 | 5.16 | -0.19 | 0  | 0  | HG12 | HB2 |
| ILE102 | Heavy | PHE4 | 5.35 | -0.19 | 0  | 0  | O    | HZ  |
| ARG105 | Heavy | GLU3 | 5.40 | -0.97 | 1  | -1 | HH21 | O   |
| GLY103 | Heavy | HIS6 | 5.72 | 0.15  | 0  | 0  | N    | HE1 |
| GLY103 | Heavy | ASP7 | 5.88 | -0.82 | 0  | -2 | HA1  | HB1 |
| TRP47  | Heavy | GLU3 | 6.03 | -0.19 | 0  | -1 | HH2  | OE2 |
| TRP52  | Heavy | HIS6 | 6.06 | -0.11 | 0  | 0  | HZ2  | HE1 |
| GLY107 | Heavy | ARG5 | 6.18 | -0.08 | 0  | 1  | HA1  | O   |
| LYS58  | Heavy | GLU3 | 6.26 | -0.96 | 1  | -1 | O    | HB2 |
| THR61  | Heavy | GLU3 | 6.27 | 0.11  | 0  | -1 | HA   | OE2 |
| GLY107 | Heavy | ASP7 | 6.29 | -0.23 | 0  | -2 | HA1  | HN  |
| TRP47  | Heavy | PHE4 | 6.47 | -0.09 | 0  | 0  | HH2  | HB2 |
| TYR59  | Heavy | ALA2 | 6.47 | 0.07  | 0  | 1  | HE1  | O   |
| ILE102 | Heavy | ASP7 | 6.48 | -0.11 | 0  | -2 | HG23 | HN  |
| ASP99  | Heavy | HIS6 | 6.52 | -0.24 | -1 | 0  | OD2  | HE2 |
| TYR110 | Heavy | HIS6 | 6.57 | -0.13 | 0  | 0  | N    | HE2 |
| TRP52  | Heavy | ARG5 | 6.59 | -0.08 | 0  | 1  | HH2  | HN  |
| LYS57  | Heavy | GLU3 | 6.60 | -1.10 | 1  | -1 | HD1  | O   |
| PRO108 | Heavy | ARG5 | 6.63 | -0.41 | 0  | 1  | HD1  | HA  |
| GLY103 | Heavy | PHE4 | 6.69 | -0.04 | 0  | 0  | HA1  | HZ  |
| TYR109 | Heavy | PHE4 | 6.77 | -0.10 | 0  | 0  | N    | HE1 |
| ALA104 | Heavy | PHE4 | 6.86 | 0.03  | 0  | 0  | C    | HZ  |
| GLY101 | Heavy | PHE4 | 6.94 | -0.01 | 0  | 0  | HA1  | HZ  |
| TRP52  | Heavy | GLU3 | 7.02 | -0.06 | 0  | -1 | HH2  | O   |
| ASP62  | Heavy | ALA2 | 7.05 | -1.65 | -1 | 1  | OD2  | HA  |
| ALA104 | Heavy | HIS6 | 7.19 | -0.09 | 0  | 0  | HN   | ND1 |
| LYS58  | Heavy | PHE4 | 7.33 | -0.10 | 1  | 0  | O    | HB1 |
| ARG105 | Heavy | ALA2 | 7.35 | 1.03  | 1  | 1  | HH21 | HB1 |
| VAL50  | Heavy | GLU3 | 7.41 | 0.00  | 0  | -1 | HG12 | HB1 |
| TYR59  | Heavy | ARG5 | 7.48 | -0.19 | 0  | 1  | OH   | HN  |
| LYS65  | Heavy | ALA2 | 7.61 | 1.55  | 1  | 1  | HZ1  | C   |
| TYR60  | Heavy | PHE4 | 7.63 | -0.06 | 0  | 0  | HN   | HB2 |
| LYS65  | Heavy | PHE4 | 7.64 | -0.22 | 1  | 0  | HZ1  | HN  |
| HIS35  | Heavy | HIS6 | 7.65 | 0.01  | 0  | 0  | HE2  | HE2 |
| HIS35  | Heavy | PHE4 | 7.69 | -0.03 | 0  | 0  | HE1  | HD1 |
| ARG100 | Heavy | HIS6 | 7.71 | 0.03  | 1  | 0  | C    | HE1 |
| ARG106 | Heavy | ASP7 | 7.81 | -1.78 | 1  | -2 | HN   | OD1 |
| TYR92  | Light | HIS6 | 2.02 | -6.48 | 0  | 0  | HA   | HD2 |
| SER93  | Light | ARG5 | 2.08 | -5.45 | 0  | 1  | HB1  | HG1 |
| THR94  | Light | PHE4 | 2.38 | -4.52 | 0  | 0  | HG23 | HB2 |
| THR94  | Light | GLU3 | 2.55 | -2.31 | 0  | -1 | HG1  | HB1 |
| SER93  | Light | PHE4 | 2.56 | -3.60 | 0  | 0  | HA   | O   |

|       |       |      |      |        |   |    |      |      |
|-------|-------|------|------|--------|---|----|------|------|
| TYR92 | Light | ARG5 | 2.56 | -10.69 | 0 | 1  | O    | HA   |
| TYR32 | Light | HIS6 | 2.60 | -4.75  | 0 | 0  | HE2  | HB1  |
| SER91 | Light | HIS6 | 2.65 | -1.60  | 0 | 0  | O    | HD2  |
| SER93 | Light | ALA2 | 2.96 | -0.57  | 0 | 1  | HB2  | HB1  |
| THR94 | Light | ALA2 | 3.30 | -1.35  | 0 | 1  | O    | HB2  |
| SER93 | Light | HIS6 | 3.61 | -1.83  | 0 | 0  | HB1  | HN   |
| THR94 | Light | ARG5 | 3.89 | -1.57  | 0 | 1  | HN   | HA   |
| ASP1  | Light | ALA2 | 3.98 | -1.98  | 0 | 1  | OD2  | HB3  |
| TYR92 | Light | PHE4 | 4.15 | -1.93  | 0 | 0  | O    | HD1  |
| LEU96 | Light | PHE4 | 4.45 | -0.37  | 0 | 0  | HD23 | HD1  |
| TYR92 | Light | ASP7 | 4.69 | 0.31   | 0 | -2 | HE1  | OT1  |
| TYR32 | Light | ASP7 | 4.74 | -1.00  | 0 | -2 | HH   | OT2  |
| GLN27 | Light | ARG5 | 4.97 | -0.13  | 0 | 1  | HG2  | HH12 |
| ILE2  | Light | ARG5 | 5.01 | -0.15  | 0 | 1  | HD1  | HE   |
| SER91 | Light | PHE4 | 5.01 | -0.29  | 0 | 0  | O    | HE1  |
| PRO95 | Light | GLU3 | 5.25 | -0.73  | 0 | -1 | HD2  | HN   |
| PRO95 | Light | ALA2 | 5.26 | -0.54  | 0 | 1  | HD2  | HB2  |
| SER93 | Light | GLU3 | 5.29 | 0.39   | 0 | -1 | HB2  | HN   |
| ILE2  | Light | ALA2 | 5.53 | -0.12  | 0 | 1  | HD1  | HB3  |
| LEU96 | Light | HIS6 | 5.53 | -0.12  | 0 | 0  | HD21 | HE2  |
| SER30 | Light | HIS6 | 5.58 | -0.15  | 0 | 0  | HB1  | HB1  |
| SER91 | Light | ARG5 | 5.69 | -0.09  | 0 | 1  | O    | HA   |
| LEU96 | Light | ARG5 | 5.90 | -0.09  | 0 | 1  | HD23 | HA   |
| THR94 | Light | HIS6 | 5.99 | -0.11  | 0 | 0  | HN   | HN   |
| ILE29 | Light | HIS6 | 6.02 | -0.20  | 0 | 0  | O    | HD2  |
| ILE29 | Light | ARG5 | 6.07 | -0.12  | 0 | 1  | HG21 | HG1  |
| ASN34 | Light | HIS6 | 6.15 | -0.03  | 0 | 0  | HD22 | HE2  |
| GLN90 | Light | HIS6 | 6.15 | -0.16  | 0 | 0  | OE1  | HD2  |
| ASP1  | Light | ARG5 | 6.22 | -0.95  | 0 | 1  | OD2  | HH12 |
| ASP1  | Light | GLU3 | 6.23 | -0.18  | 0 | -1 | OD2  | HN   |
| PRO95 | Light | PHE4 | 6.24 | -0.07  | 0 | 0  | N    | HN   |
| TYR32 | Light | ARG5 | 6.24 | -0.16  | 0 | 1  | HE2  | HG2  |
| TYR92 | Light | ALA2 | 6.43 | -0.03  | 0 | 1  | O    | HB1  |
| SER28 | Light | ARG5 | 6.64 | -0.26  | 0 | 1  | O    | HG1  |
| LEU96 | Light | ALA2 | 6.96 | -0.03  | 0 | 1  | HD23 | HB2  |
| SER30 | Light | ASP7 | 7.07 | -0.12  | 0 | -2 | HB2  | OT1  |
| SER31 | Light | HIS6 | 7.09 | -0.14  | 0 | 0  | HN   | HB1  |
| ILE2  | Light | PHE4 | 7.10 | -0.03  | 0 | 0  | HD1  | O    |
| GLN90 | Light | ARG5 | 7.11 | -0.05  | 0 | 1  | OE1  | HA   |
| TYR32 | Light | PHE4 | 7.28 | -0.07  | 0 | 0  | HE2  | HE1  |
| GLN90 | Light | PHE4 | 7.33 | -0.05  | 0 | 0  | HE22 | O    |
| ASP1  | Light | PHE4 | 7.37 | 0.01   | 0 | 0  | OD2  | O    |
| GLN90 | Light | ALA2 | 7.44 | 0.01   | 0 | 1  | HE22 | HB2  |
| ILE2  | Light | HIS6 | 7.45 | -0.09  | 0 | 0  | HD1  | HN   |
| SER28 | Light | HIS6 | 7.53 | -0.02  | 0 | 0  | O    | HB1  |
| GLN27 | Light | ALA2 | 7.60 | 0.10   | 0 | 1  | HG2  | HB3  |
| SER93 | Light | ASP7 | 7.67 | 0.09   | 0 | -2 | HB1  | N    |
| LEU33 | Light | HIS6 | 7.68 | -0.07  | 0 | 0  | N    | HD2  |



|       |       |      |      |       |   |    |      |     |
|-------|-------|------|------|-------|---|----|------|-----|
| LEU96 | Light | GLU3 | 7.72 | -0.06 | 0 | -1 | HD23 | HB1 |
|-------|-------|------|------|-------|---|----|------|-----|

**Table S6** – Quantum biochemistry details of FC MD3

| Adu Residue | Adu Chain | A $\beta$ Residue | Distance (Å) | Interaction Energy (kcal/mol) | Adu Residue Charge | A $\beta$ Residue Charge | Adu Atom | A $\beta$ Atom |
|-------------|-----------|-------------------|--------------|-------------------------------|--------------------|--------------------------|----------|----------------|
| LYS65       | Heavy     | GLU3              | 1.67         | -13.47                        | 1                  | -1                       | HZ2      | OE1            |
| PRO108      | Heavy     | HIS6              | 1.95         | -4.71                         | 0                  | 0                        | O        | HE2            |
| ILE102      | Heavy     | HIS6              | 2.08         | -1.29                         | 0                  | 0                        | HG21     | HE1            |
| ARG105      | Heavy     | PHE4              | 2.23         | -4.19                         | 1                  | 0                        | HB1      | HE2            |
| GLY107      | Heavy     | PHE4              | 2.70         | -2.40                         | 0                  | 0                        | HA1      | CZ             |
| TYR59       | Heavy     | GLU3              | 2.70         | -6.41                         | 0                  | -1                       | HE1      | HB2            |
| TRP52       | Heavy     | PHE4              | 2.82         | -3.41                         | 0                  | 0                        | HH2      | CG             |
| PRO108      | Heavy     | PHE4              | 3.09         | -1.94                         | 0                  | 0                        | HD1      | HE1            |
| GLY107      | Heavy     | HIS6              | 3.11         | -1.53                         | 0                  | 0                        | O        | HE1            |
| TYR59       | Heavy     | PHE4              | 3.51         | -2.01                         | 0                  | 0                        | HE2      | HB1            |
| TYR109      | Heavy     | HIS6              | 3.68         | -1.58                         | 0                  | 0                        | HA       | HE2            |
| TYR60       | Heavy     | GLU3              | 3.70         | -0.11                         | 0                  | -1                       | O        | OE1            |
| GLY103      | Heavy     | HIS6              | 3.84         | -0.91                         | 0                  | 0                        | HA1      | HE1            |
| ARG105      | Heavy     | GLU3              | 4.02         | -2.09                         | 1                  | -1                       | HH21     | O              |
| ILE102      | Heavy     | PHE4              | 4.42         | -0.29                         | 0                  | 0                        | O        | HZ             |
| ASP62       | Heavy     | GLU3              | 4.49         | 2.12                          | -1                 | -1                       | OD1      | OE1            |
| ARG105      | Heavy     | ARG5              | 4.58         | 0.07                          | 1                  | 1                        | HH22     | HN             |
| ARG106      | Heavy     | PHE4              | 4.79         | -0.47                         | 1                  | 0                        | HN       | HZ             |
| ALA104      | Heavy     | ASP7              | 4.81         | -1.21                         | 0                  | -2                       | HB1      | OD1            |
| GLY101      | Heavy     | HIS6              | 4.81         | 0.17                          | 0                  | 0                        | HA2      | HE1            |
| ARG106      | Heavy     | HIS6              | 4.90         | -0.04                         | 1                  | 0                        | HA       | HE1            |
| GLY103      | Heavy     | PHE4              | 4.98         | -0.07                         | 0                  | 0                        | HA1      | HZ             |
| THR61       | Heavy     | GLU3              | 5.03         | -0.03                         | 0                  | -1                       | HA       | OE1            |
| TRP47       | Heavy     | GLU3              | 5.22         | -0.10                         | 0                  | -1                       | HZ3      | OE1            |
| TRP52       | Heavy     | ARG5              | 5.43         | -0.10                         | 0                  | 1                        | HH2      | HN             |
| VAL50       | Heavy     | PHE4              | 5.46         | -0.12                         | 0                  | 0                        | HG12     | HB2            |
| ARG105      | Heavy     | ASP7              | 5.51         | -3.49                         | 1                  | -2                       | HG1      | OD1            |
| LYS57       | Heavy     | PHE4              | 5.54         | -0.25                         | 1                  | 0                        | HG1      | HB1            |
| GLY103      | Heavy     | ASP7              | 5.68         | -0.51                         | 0                  | -2                       | HA1      | HN             |
| ARG105      | Heavy     | HIS6              | 5.69         | -0.64                         | 1                  | 0                        | HB1      | HA             |
| LYS58       | Heavy     | GLU3              | 5.80         | -0.96                         | 1                  | -1                       | O        | OE2            |
| ALA104      | Heavy     | HIS6              | 5.87         | -0.22                         | 0                  | 0                        | HN       | ND1            |
| ALA104      | Heavy     | PHE4              | 5.97         | -0.05                         | 0                  | 0                        | C        | HE2            |
| LYS57       | Heavy     | GLU3              | 6.02         | -1.56                         | 1                  | -1                       | HE2      | O              |
| GLY107      | Heavy     | ARG5              | 6.12         | 0.04                          | 0                  | 1                        | HA1      | HN             |
| TRP52       | Heavy     | HIS6              | 6.22         | -0.12                         | 0                  | 0                        | HZ2      | HE1            |
| TRP52       | Heavy     | GLU3              | 6.25         | -0.09                         | 0                  | -1                       | HH2      | O              |
| PRO108      | Heavy     | ARG5              | 6.42         | -0.40                         | 0                  | 1                        | HD1      | N              |
| TYR109      | Heavy     | PHE4              | 6.52         | -0.09                         | 0                  | 0                        | N        | HE1            |
| ARG105      | Heavy     | ALA2              | 6.57         | 0.91                          | 1                  | 1                        | HH21     | O              |
| TYR59       | Heavy     | ALA2              | 6.63         | 0.02                          | 0                  | 1                        | HH       | O              |

|        |       |      |      |       |    |    |      |      |
|--------|-------|------|------|-------|----|----|------|------|
| TYR110 | Heavy | HIS6 | 6.66 | -0.08 | 0  | 0  | N    | HE2  |
| ASP99  | Heavy | HIS6 | 6.66 | -0.25 | -1 | 0  | OD2  | HE2  |
| TRP47  | Heavy | PHE4 | 6.68 | -0.09 | 0  | 0  | HH2  | HB2  |
| TYR59  | Heavy | ARG5 | 6.82 | -0.11 | 0  | 1  | OH   | HN   |
| GLY101 | Heavy | PHE4 | 6.92 | -0.04 | 0  | 0  | HA1  | HZ   |
| LYS65  | Heavy | ALA2 | 6.96 | 2.01  | 1  | 1  | HZ2  | HA   |
| ILE102 | Heavy | ASP7 | 7.09 | -0.06 | 0  | -2 | HG22 | HN   |
| HIS35  | Heavy | PHE4 | 7.19 | -0.03 | 0  | 0  | HE1  | HD1  |
| VAL50  | Heavy | GLU3 | 7.21 | 0.04  | 0  | -1 | HG13 | HB1  |
| HIS35  | Heavy | HIS6 | 7.44 | 0.01  | 0  | 0  | HE2  | HE2  |
| GLY103 | Heavy | ARG5 | 7.52 | -0.04 | 0  | 1  | HA1  | O    |
| LYS65  | Heavy | PHE4 | 7.53 | -0.24 | 1  | 0  | HZ2  | HN   |
| GLY107 | Heavy | ASP7 | 7.54 | -0.14 | 0  | -2 | HN   | HN   |
| ASP62  | Heavy | ALA2 | 7.58 | -1.76 | -1 | 1  | OD2  | HA   |
| ARG106 | Heavy | ASP7 | 7.64 | -1.78 | 1  | -2 | HN   | HN   |
| ARG100 | Heavy | HIS6 | 7.66 | 0.06  | 1  | 0  | C    | HE1  |
| ALA104 | Heavy | ARG5 | 7.84 | 0.00  | 0  | 1  | HB1  | O    |
| ARG106 | Heavy | ARG5 | 7.86 | 0.63  | 1  | 1  | HN   | O    |
| ILE102 | Heavy | ARG5 | 7.91 | -0.21 | 0  | 1  | O    | O    |
| ALA49  | Heavy | GLU3 | 7.97 | -0.07 | 0  | -1 | HA   | OE1  |
| SER93  | Light | ARG5 | 1.83 | -8.99 | 0  | 1  | OG   | HH12 |
| THR94  | Light | PHE4 | 1.99 | -7.04 | 0  | 0  | OG1  | HN   |
| THR94  | Light | GLU3 | 2.04 | -2.88 | 0  | -1 | HG1  | HN   |
| GLN27  | Light | ARG5 | 2.09 | -4.16 | 0  | 1  | OE1  | HH21 |
| TYR92  | Light | HIS6 | 2.24 | -5.43 | 0  | 0  | HA   | HD2  |
| SER93  | Light | PHE4 | 2.51 | -4.00 | 0  | 0  | HA   | O    |
| SER93  | Light | ALA2 | 2.55 | -0.64 | 0  | 1  | HG1  | HB2  |
| TYR92  | Light | ARG5 | 2.63 | -8.85 | 0  | 1  | O    | HA   |
| THR94  | Light | ALA2 | 2.66 | -0.73 | 0  | 1  | HG1  | HB1  |
| ILE2   | Light | ARG5 | 2.70 | -1.56 | 0  | 1  | HD3  | HH12 |
| SER91  | Light | HIS6 | 2.89 | -0.96 | 0  | 0  | O    | HD2  |
| ASP1   | Light | ALA2 | 3.35 | -2.95 | 0  | 1  | OD1  | HB2  |
| ASP1   | Light | ARG5 | 3.61 | -3.53 | 0  | 1  | OD1  | HH11 |
| TYR92  | Light | PHE4 | 3.67 | -1.65 | 0  | 0  | O    | HE1  |
| TYR32  | Light | HIS6 | 3.83 | -2.42 | 0  | 0  | HE1  | HB1  |
| LEU96  | Light | PHE4 | 3.86 | -0.53 | 0  | 0  | HD22 | HD1  |
| SER93  | Light | HIS6 | 3.92 | -1.33 | 0  | 0  | HB2  | HN   |
| THR94  | Light | ARG5 | 4.03 | -2.92 | 0  | 1  | HN   | HA   |
| SER91  | Light | PHE4 | 4.43 | -0.20 | 0  | 0  | O    | HE1  |
| PRO95  | Light | GLU3 | 4.54 | -0.72 | 0  | -1 | HD2  | HN   |
| TYR92  | Light | ASP7 | 4.76 | 0.30  | 0  | -2 | HE1  | N    |
| PRO95  | Light | ALA2 | 4.83 | -0.88 | 0  | 1  | HD2  | HA   |
| ILE2   | Light | ALA2 | 4.93 | -0.13 | 0  | 1  | HD3  | HB2  |
| SER93  | Light | GLU3 | 5.53 | 0.39  | 0  | -1 | HG1  | HN   |
| SER28  | Light | ARG5 | 5.77 | -0.59 | 0  | 1  | O    | HH21 |
| LEU96  | Light | HIS6 | 5.85 | -0.10 | 0  | 0  | HD23 | HD2  |
| PRO95  | Light | PHE4 | 5.86 | -0.34 | 0  | 0  | N    | HN   |
| TYR32  | Light | ASP7 | 5.93 | 0.12  | 0  | -2 | HE1  | OT1  |

|       |       |      |      |       |   |    |      |      |
|-------|-------|------|------|-------|---|----|------|------|
| GLN90 | Light | ARG5 | 5.94 | -0.20 | 0 | 1  | HE22 | HH12 |
| THR94 | Light | HIS6 | 5.98 | -0.11 | 0 | 0  | HN   | HN   |
| LEU96 | Light | ARG5 | 6.07 | -0.12 | 0 | 1  | HD22 | HA   |
| ASP1  | Light | GLU3 | 6.12 | 0.02  | 0 | -1 | OD1  | HN   |
| SER30 | Light | HIS6 | 6.18 | -0.11 | 0 | 0  | HB1  | HB1  |
| SER91 | Light | ARG5 | 6.19 | 0.00  | 0 | 1  | O    | HA   |
| ILE29 | Light | ARG5 | 6.33 | -0.23 | 0 | 1  | HG21 | HH12 |
| TYR92 | Light | ALA2 | 6.33 | -0.13 | 0 | 1  | O    | HB3  |
| ILE29 | Light | HIS6 | 6.34 | -0.13 | 0 | 0  | O    | HB1  |
| GLN27 | Light | ALA2 | 6.45 | -0.10 | 0 | 1  | HE22 | HB2  |
| GLN90 | Light | ALA2 | 6.48 | -0.06 | 0 | 1  | HE22 | HB1  |
| GLN90 | Light | HIS6 | 6.54 | -0.10 | 0 | 0  | OE1  | HD2  |
| LEU96 | Light | ALA2 | 6.55 | -0.12 | 0 | 1  | HD21 | HB1  |
| PRO95 | Light | ARG5 | 6.65 | -0.37 | 0 | 1  | HD1  | HH12 |
| ILE2  | Light | PHE4 | 6.66 | -0.06 | 0 | 0  | HD3  | O    |
| GLN90 | Light | PHE4 | 6.69 | -0.05 | 0 | 0  | HE22 | O    |
| TYR32 | Light | ARG5 | 6.94 | -0.37 | 0 | 1  | HD1  | HG1  |
| ASN34 | Light | HIS6 | 7.01 | -0.01 | 0 | 0  | HD22 | HE2  |
| SER30 | Light | ASP7 | 7.21 | -0.17 | 0 | -2 | HB2  | OT2  |
| ASP1  | Light | PHE4 | 7.22 | -0.01 | 0 | 0  | OD1  | O    |
| ILE2  | Light | HIS6 | 7.25 | -0.05 | 0 | 0  | HD3  | HN   |
| TYR32 | Light | PHE4 | 7.30 | -0.08 | 0 | 0  | CD2  | HE1  |
| SER31 | Light | HIS6 | 7.37 | -0.16 | 0 | 0  | HN   | HB1  |
| SER26 | Light | ARG5 | 7.37 | 0.13  | 0 | 1  | HG1  | HH11 |
| LEU96 | Light | GLU3 | 7.42 | -0.06 | 0 | -1 | HG   | HB1  |
| SER93 | Light | ASP7 | 7.62 | 0.11  | 0 | -2 | HB2  | N    |

**Table S7** – Quantum biochemistry details of FC LMD-Wild

| Adu Residue | Adu Chain | A $\beta$ Residue | Distance (Å) | Interaction Energy (kcal/mol) | Adu Residue Charge | A $\beta$ Residue Charge | Adu Atom | A $\beta$ Atom |
|-------------|-----------|-------------------|--------------|-------------------------------|--------------------|--------------------------|----------|----------------|
| LYS65       | Heavy     | GLU3              | 1.77         | -15.48                        | 1                  | -1                       | HZ2      | OE2            |
| PRO108      | Heavy     | HIS6              | 1.90         | -5.48                         | 0                  | 0                        | O        | HE2            |
| ILE102      | Heavy     | HIS6              | 2.14         | -0.87                         | 0                  | 0                        | HG23     | HE1            |
| TYR59       | Heavy     | GLU3              | 2.25         | -6.91                         | 0                  | -1                       | HE1      | HB2            |
| GLY107      | Heavy     | PHE4              | 2.51         | -1.20                         | 0                  | 0                        | HA1      | HZ             |
| GLY107      | Heavy     | HIS6              | 2.67         | -3.06                         | 0                  | 0                        | O        | HE1            |
| PRO108      | Heavy     | PHE4              | 2.74         | -2.67                         | 0                  | 0                        | HD1      | CE1            |
| TYR59       | Heavy     | PHE4              | 2.78         | -4.56                         | 0                  | 0                        | CZ       | HB1            |
| TRP52       | Heavy     | PHE4              | 2.92         | -2.99                         | 0                  | 0                        | HH2      | CD2            |
| TYR60       | Heavy     | GLU3              | 3.71         | -1.07                         | 0                  | -1                       | O        | OE2            |
| TYR109      | Heavy     | HIS6              | 4.07         | -1.84                         | 0                  | 0                        | HA       | HE2            |
| ARG105      | Heavy     | ASP7              | 4.09         | -5.12                         | 1                  | -2                       | HH22     | OD1            |
| GLY101      | Heavy     | HIS6              | 4.67         | 0.00                          | 0                  | 0                        | HA2      | HE1            |
| ASP62       | Heavy     | GLU3              | 4.78         | 1.48                          | -1                 | -1                       | OD2      | OE2            |
| ARG106      | Heavy     | HIS6              | 4.80         | -0.52                         | 1                  | 0                        | C        | HE1            |
| ARG105      | Heavy     | PHE4              | 4.95         | -0.22                         | 1                  | 0                        | HB1      | HE2            |

|        |       |      |      |        |    |    |      |     |
|--------|-------|------|------|--------|----|----|------|-----|
| VAL50  | Heavy | PHE4 | 5.22 | -0.20  | 0  | 0  | HG12 | HB2 |
| LYS57  | Heavy | PHE4 | 5.23 | -0.25  | 1  | 0  | HD2  | HD2 |
| TRP47  | Heavy | GLU3 | 5.27 | -0.29  | 0  | -1 | HH2  | HB1 |
| ILE102 | Heavy | PHE4 | 5.42 | -0.14  | 0  | 0  | HG23 | HZ  |
| GLY103 | Heavy | HIS6 | 5.44 | -0.19  | 0  | 0  | N    | HE1 |
| THR61  | Heavy | GLU3 | 5.51 | 0.02   | 0  | -1 | HA   | OE2 |
| ARG106 | Heavy | PHE4 | 5.71 | -0.16  | 1  | 0  | C    | HZ  |
| TYR59  | Heavy | ARG5 | 6.00 | -0.21  | 0  | 1  | HH   | HN  |
| TRP52  | Heavy | HIS6 | 6.11 | -0.18  | 0  | 0  | HH2  | HE2 |
| LYS58  | Heavy | GLU3 | 6.28 | -1.15  | 1  | -1 | O    | HB2 |
| TRP47  | Heavy | PHE4 | 6.28 | -0.14  | 0  | 0  | HH2  | HB2 |
| ARG105 | Heavy | HIS6 | 6.44 | -0.43  | 1  | 0  | HN   | HE1 |
| PRO108 | Heavy | ARG5 | 6.44 | -0.58  | 0  | 1  | HD1  | HA  |
| TRP52  | Heavy | ARG5 | 6.47 | -0.13  | 0  | 1  | HH2  | HN  |
| ASP99  | Heavy | HIS6 | 6.50 | -0.27  | -1 | 0  | OD2  | HE2 |
| TYR59  | Heavy | ALA2 | 6.52 | 0.05   | 0  | 1  | HE1  | C   |
| GLY107 | Heavy | ARG5 | 6.59 | -0.11  | 0  | 1  | HA1  | O   |
| TYR109 | Heavy | PHE4 | 6.67 | -0.13  | 0  | 0  | N    | HE1 |
| LYS58  | Heavy | PHE4 | 6.69 | -0.26  | 1  | 0  | O    | HB1 |
| GLY107 | Heavy | ASP7 | 6.82 | -0.07  | 0  | -2 | HA1  | HN  |
| ILE102 | Heavy | ASP7 | 6.85 | -0.04  | 0  | -2 | HG21 | HN  |
| GLY101 | Heavy | PHE4 | 6.87 | -0.03  | 0  | 0  | HA2  | HZ  |
| HIS35  | Heavy | PHE4 | 6.87 | -0.04  | 0  | 0  | HE1  | HE1 |
| LYS57  | Heavy | GLU3 | 6.99 | -1.42  | 1  | -1 | HZ3  | O   |
| TYR110 | Heavy | HIS6 | 7.00 | -0.09  | 0  | 0  | HN   | HE2 |
| ASP62  | Heavy | ALA2 | 7.02 | -1.68  | -1 | 1  | OD2  | HA  |
| LYS65  | Heavy | ALA2 | 7.09 | 1.47   | 1  | 1  | HZ3  | HA  |
| VAL50  | Heavy | GLU3 | 7.09 | 0.05   | 0  | -1 | HG13 | HB1 |
| ALA104 | Heavy | ASP7 | 7.12 | -0.47  | 0  | -2 | HB2  | HB1 |
| HIS35  | Heavy | HIS6 | 7.16 | 0.01   | 0  | 0  | HE1  | HE2 |
| GLY103 | Heavy | ASP7 | 7.22 | -0.08  | 0  | -2 | HA1  | OT1 |
| ARG105 | Heavy | ARG5 | 7.26 | 0.71   | 1  | 1  | HH22 | O   |
| TYR60  | Heavy | PHE4 | 7.30 | -0.08  | 0  | 0  | HN   | HB2 |
| LYS65  | Heavy | PHE4 | 7.30 | -0.24  | 1  | 0  | HZ2  | HN  |
| ALA104 | Heavy | HIS6 | 7.48 | -0.06  | 0  | 0  | N    | HE1 |
| TRP52  | Heavy | GLU3 | 7.51 | -0.02  | 0  | -1 | HH2  | O   |
| ARG100 | Heavy | HIS6 | 7.56 | 0.03   | 1  | 0  | C    | HE1 |
| LYS57  | Heavy | ASP7 | 7.57 | -2.38  | 1  | -2 | HZ2  | OD1 |
| TRP47  | Heavy | ALA2 | 7.70 | -0.10  | 0  | 1  | HZ3  | HA  |
| LYS57  | Heavy | ARG5 | 7.92 | 0.69   | 1  | 1  | HZ3  | HN  |
| TRP52  | Heavy | ASP7 | 7.99 | -0.09  | 0  | -2 | HZ2  | HN  |
| ASP1   | Light | ALA2 | 1.63 | -13.97 | 0  | 1  | OD1  | H1  |
| TYR92  | Light | HIS6 | 2.07 | -8.37  | 0  | 0  | HA   | HD2 |
| THR94  | Light | PHE4 | 2.16 | -7.00  | 0  | 0  | HN   | O   |
| SER93  | Light | ARG5 | 2.20 | -4.34  | 0  | 1  | HB1  | HA  |
| SER93  | Light | ALA2 | 2.36 | -0.71  | 0  | 1  | HB2  | HB1 |
| THR94  | Light | GLU3 | 2.39 | -4.95  | 0  | -1 | HG1  | HN  |
| SER93  | Light | PHE4 | 2.45 | -2.07  | 0  | 0  | HB2  | O   |

|       |       |      |      |        |   |    |      |      |
|-------|-------|------|------|--------|---|----|------|------|
| TYR32 | Light | HIS6 | 2.49 | -3.63  | 0 | 0  | HE1  | HB2  |
| TYR92 | Light | ARG5 | 2.54 | -11.03 | 0 | 1  | O    | HA   |
| THR94 | Light | ALA2 | 2.64 | -2.23  | 0 | 1  | O    | HB2  |
| SER91 | Light | HIS6 | 2.93 | -0.61  | 0 | 0  | O    | HD2  |
| TYR92 | Light | PHE4 | 3.51 | -1.94  | 0 | 0  | O    | HE1  |
| SER93 | Light | HIS6 | 3.59 | -1.81  | 0 | 0  | HB1  | HN   |
| LEU96 | Light | PHE4 | 3.94 | -0.55  | 0 | 0  | HD21 | HE1  |
| THR94 | Light | ARG5 | 3.99 | -1.20  | 0 | 1  | HN   | HA   |
| TYR92 | Light | ASP7 | 4.22 | -0.32  | 0 | -2 | HH   | HA   |
| PRO95 | Light | ALA2 | 4.23 | -0.71  | 0 | 1  | HD2  | HA   |
| ASP1  | Light | ARG5 | 4.26 | -1.12  | 0 | 1  | OD2  | HB2  |
| SER91 | Light | PHE4 | 4.39 | -0.30  | 0 | 0  | O    | HE1  |
| PRO95 | Light | GLU3 | 5.04 | -0.86  | 0 | -1 | HD2  | HN   |
| ILE2  | Light | ALA2 | 5.07 | -0.44  | 0 | 1  | HN   | HB2  |
| SER93 | Light | GLU3 | 5.14 | 0.29   | 0 | -1 | HB2  | HN   |
| SER30 | Light | HIS6 | 5.28 | -0.29  | 0 | 0  | HB2  | HB2  |
| LEU96 | Light | HIS6 | 5.29 | -0.11  | 0 | 0  | HD21 | HE2  |
| TYR32 | Light | PHE4 | 5.43 | -0.12  | 0 | 0  | HE1  | HZ   |
| ASP1  | Light | GLU3 | 5.67 | 0.48   | 0 | -1 | OD1  | HN   |
| TYR32 | Light | ASP7 | 5.68 | -0.22  | 0 | -2 | OH   | OT1  |
| ASP1  | Light | PHE4 | 5.80 | -0.12  | 0 | 0  | OD2  | O    |
| PRO95 | Light | PHE4 | 5.96 | -0.16  | 0 | 0  | N    | HN   |
| THR94 | Light | HIS6 | 6.07 | -0.14  | 0 | 0  | HN   | HN   |
| GLN90 | Light | ALA2 | 6.08 | -0.06  | 0 | 1  | HE22 | HB2  |
| GLN90 | Light | HIS6 | 6.11 | -0.15  | 0 | 0  | OE1  | HD2  |
| TYR92 | Light | ALA2 | 6.17 | -0.03  | 0 | 1  | O    | HB1  |
| ILE2  | Light | ARG5 | 6.28 | -0.15  | 0 | 1  | HG12 | HB2  |
| ILE29 | Light | HIS6 | 6.31 | -0.18  | 0 | 0  | O    | HB1  |
| SER91 | Light | ARG5 | 6.47 | 0.47   | 0 | 1  | O    | HA   |
| GLN90 | Light | PHE4 | 6.48 | -0.11  | 0 | 0  | HE22 | O    |
| TYR32 | Light | ARG5 | 6.58 | -0.09  | 0 | 1  | HE1  | C    |
| SER28 | Light | ARG5 | 6.62 | -0.23  | 0 | 1  | O    | HH12 |
| LEU96 | Light | ARG5 | 6.66 | -0.01  | 0 | 1  | HD21 | HA   |
| GLN90 | Light | ARG5 | 6.73 | -0.14  | 0 | 1  | OE1  | HA   |
| SER30 | Light | ARG5 | 6.75 | -0.14  | 0 | 1  | HG1  | HH12 |
| SER30 | Light | ASP7 | 6.78 | 0.15   | 0 | -2 | OG   | OT1  |
| GLN27 | Light | ARG5 | 6.81 | -0.01  | 0 | 1  | HG1  | HH12 |
| ILE29 | Light | ARG5 | 7.03 | -0.18  | 0 | 1  | HG22 | HB1  |
| LEU96 | Light | ALA2 | 7.17 | 0.00   | 0 | 1  | HG   | HB1  |
| ILE2  | Light | PHE4 | 7.21 | -0.06  | 0 | 0  | HG12 | O    |
| SER93 | Light | ASP7 | 7.35 | 0.09   | 0 | -2 | HB1  | N    |
| ASN34 | Light | HIS6 | 7.39 | -0.01  | 0 | 0  | HD22 | HE2  |
| GLN3  | Light | ALA2 | 7.49 | -0.03  | 0 | 1  | HE22 | HB2  |
| ILE2  | Light | HIS6 | 7.62 | -0.05  | 0 | 0  | HG12 | HN   |
| LEU96 | Light | GLU3 | 7.64 | -0.07  | 0 | -1 | HG   | HB1  |

**Table S8** – Quantum biochemistry details of FC MD4

| <b>Adu Residue</b> | <b>Adu Chain</b> | <b>A<math>\beta</math> Residue</b> | <b>Distance (Å)</b> | <b>Interaction Energy (kcal/mol)</b> | <b>Adu Residue Charge</b> | <b>A<math>\beta</math> Residue Charge</b> | <b>Adu Atom</b> | <b>A<math>\beta</math> Atom</b> |
|--------------------|------------------|------------------------------------|---------------------|--------------------------------------|---------------------------|-------------------------------------------|-----------------|---------------------------------|
| ARG105             | Heavy            | ARG5                               | 1.70                | -4.37                                | 1                         | 1                                         | HH11            | O                               |
| LYS65              | Heavy            | GLU3                               | 1.93                | -15.25                               | 1                         | -1                                        | HZ1             | OE1                             |
| PRO108             | Heavy            | HIS6                               | 2.14                | -6.29                                | 0                         | 0                                         | O               | HE2                             |
| ARG105             | Heavy            | ASP7                               | 2.16                | -9.50                                | 1                         | -2                                        | HH12            | OD1                             |
| GLY107             | Heavy            | HIS6                               | 2.38                | -4.10                                | 0                         | 0                                         | HA1             | HE1                             |
| TYR59              | Heavy            | GLU3                               | 2.45                | -8.76                                | 0                         | -1                                        | HE1             | HB2                             |
| ILE102             | Heavy            | HIS6                               | 2.46                | -2.66                                | 0                         | 0                                         | HG22            | HE1                             |
| TYR59              | Heavy            | PHE4                               | 2.49                | -4.50                                | 0                         | 0                                         | HH              | HD2                             |
| ARG105             | Heavy            | PHE4                               | 2.62                | -1.13                                | 1                         | 0                                         | HB1             | HE2                             |
| GLY107             | Heavy            | PHE4                               | 2.73                | -1.77                                | 0                         | 0                                         | HA1             | HZ                              |
| ARG105             | Heavy            | HIS6                               | 2.94                | -4.06                                | 1                         | 0                                         | HH11            | HA                              |
| TRP52              | Heavy            | PHE4                               | 3.23                | -2.45                                | 0                         | 0                                         | HH2             | CE2                             |
| PRO108             | Heavy            | PHE4                               | 3.51                | -1.45                                | 0                         | 0                                         | HD1             | HE1                             |
| TYR60              | Heavy            | GLU3                               | 3.54                | -1.77                                | 0                         | -1                                        | O               | OE1                             |
| ARG106             | Heavy            | HIS6                               | 4.07                | -0.41                                | 1                         | 0                                         | C               | HE1                             |
| TYR109             | Heavy            | HIS6                               | 4.15                | -1.71                                | 0                         | 0                                         | N               | HE2                             |
| GLY103             | Heavy            | HIS6                               | 4.23                | -0.75                                | 0                         | 0                                         | HA1             | HE1                             |
| ASP62              | Heavy            | GLU3                               | 4.57                | 1.19                                 | -1                        | -1                                        | OD1             | OE1                             |
| GLY101             | Heavy            | HIS6                               | 4.76                | 0.01                                 | 0                         | 0                                         | HA2             | HE1                             |
| ILE102             | Heavy            | PHE4                               | 4.95                | -0.29                                | 0                         | 0                                         | O               | HZ                              |
| ARG106             | Heavy            | PHE4                               | 5.06                | -0.58                                | 1                         | 0                                         | HN              | HZ                              |
| LYS57              | Heavy            | PHE4                               | 5.34                | -0.21                                | 1                         | 0                                         | HG2             | HD2                             |
| THR61              | Heavy            | GLU3                               | 5.36                | 0.01                                 | 0                         | -1                                        | HA              | OE1                             |
| GLY103             | Heavy            | PHE4                               | 5.37                | -0.07                                | 0                         | 0                                         | HA1             | HZ                              |
| ARG105             | Heavy            | GLU3                               | 5.39                | -1.23                                | 1                         | -1                                        | HH21            | O                               |
| GLY103             | Heavy            | ASP7                               | 5.45                | -0.27                                | 0                         | -2                                        | HA1             | HN                              |
| TRP52              | Heavy            | HIS6                               | 5.49                | -0.15                                | 0                         | 0                                         | HZ2             | HE1                             |
| VAL50              | Heavy            | PHE4                               | 5.60                | -0.17                                | 0                         | 0                                         | HG12            | HB2                             |
| TRP47              | Heavy            | GLU3                               | 5.79                | -0.14                                | 0                         | -1                                        | HH2             | OE1                             |
| ALA104             | Heavy            | ASP7                               | 5.80                | -0.51                                | 0                         | -2                                        | HN              | HB1                             |
| ALA104             | Heavy            | HIS6                               | 6.09                | -0.31                                | 0                         | 0                                         | N               | HE1                             |
| TRP47              | Heavy            | PHE4                               | 6.17                | -0.10                                | 0                         | 0                                         | HH2             | HB2                             |
| LYS58              | Heavy            | GLU3                               | 6.22                | -1.16                                | 1                         | -1                                        | O               | OE1                             |
| PRO108             | Heavy            | ARG5                               | 6.35                | -0.24                                | 0                         | 1                                         | HD1             | HA                              |
| ALA104             | Heavy            | PHE4                               | 6.40                | 0.09                                 | 0                         | 0                                         | HN              | HZ                              |
| TYR59              | Heavy            | ALA2                               | 6.42                | 0.10                                 | 0                         | 1                                         | HE1             | C                               |
| ASP99              | Heavy            | HIS6                               | 6.44                | -0.27                                | -1                        | 0                                         | OD2             | HE2                             |
| ASP62              | Heavy            | ALA2                               | 6.47                | -1.95                                | -1                        | 1                                         | OD2             | HA                              |
| GLY107             | Heavy            | ARG5                               | 6.48                | -0.18                                | 0                         | 1                                         | HA1             | C                               |
| TYR59              | Heavy            | ARG5                               | 6.53                | -0.32                                | 0                         | 1                                         | OH              | HN                              |
| ILE102             | Heavy            | ASP7                               | 6.56                | -0.22                                | 0                         | -2                                        | HG22            | HN                              |
| HIS35              | Heavy            | HIS6                               | 6.66                | 0.00                                 | 0                         | 0                                         | HE1             | HE2                             |

|        |       |      |      |        |   |    |      |     |
|--------|-------|------|------|--------|---|----|------|-----|
| LYS65  | Heavy | ALA2 | 6.98 | 1.81   | 1 | 1  | HZ1  | HA  |
| TRP52  | Heavy | ARG5 | 7.11 | -0.05  | 0 | 1  | HH2  | N   |
| TYR110 | Heavy | HIS6 | 7.15 | -0.13  | 0 | 0  | N    | HE2 |
| MET111 | Heavy | HIS6 | 7.20 | -0.03  | 0 | 0  | HE3  | HE2 |
| VAL50  | Heavy | GLU3 | 7.24 | 0.06   | 0 | -1 | HG13 | HB1 |
| TYR109 | Heavy | PHE4 | 7.32 | -0.08  | 0 | 0  | N    | HE1 |
| LYS65  | Heavy | PHE4 | 7.33 | -0.31  | 1 | 0  | HZ1  | HN  |
| LYS58  | Heavy | PHE4 | 7.33 | -0.14  | 1 | 0  | C    | HB1 |
| GLY101 | Heavy | PHE4 | 7.38 | -0.03  | 0 | 0  | HA1  | HZ  |
| GLY107 | Heavy | ASP7 | 7.44 | 0.00   | 0 | -2 | HA1  | HN  |
| TRP52  | Heavy | GLU3 | 7.44 | -0.03  | 0 | -1 | HH2  | O   |
| TYR60  | Heavy | PHE4 | 7.50 | -0.07  | 0 | 0  | O    | HN  |
| ALA49  | Heavy | GLU3 | 7.52 | -0.09  | 0 | -1 | HA   | OE1 |
| ARG105 | Heavy | ALA2 | 7.53 | 0.96   | 1 | 1  | HH21 | O   |
| VAL50  | Heavy | HIS6 | 7.55 | -0.01  | 0 | 0  | HG23 | HE2 |
| LYS57  | Heavy | GLU3 | 7.56 | -1.13  | 1 | -1 | HB2  | HB2 |
| ILE102 | Heavy | ARG5 | 7.58 | -0.07  | 0 | 1  | HG22 | C   |
| ARG100 | Heavy | HIS6 | 7.58 | 0.06   | 1 | 0  | O    | HE1 |
| TRP47  | Heavy | ALA2 | 7.79 | -0.14  | 0 | 1  | HZ3  | HA  |
| GLY103 | Heavy | ARG5 | 7.81 | -0.01  | 0 | 1  | HA1  | O   |
| THR61  | Heavy | ALA2 | 7.82 | 0.14   | 0 | 1  | HA   | HA  |
| TYR60  | Heavy | ALA2 | 7.83 | -0.27  | 0 | 1  | O    | HA  |
| HIS35  | Heavy | PHE4 | 7.84 | -0.04  | 0 | 0  | HE1  | HD1 |
| ASP1   | Light | ALA2 | 1.71 | -13.36 | 0 | 1  | OD1  | H3  |
| THR94  | Light | PHE4 | 1.95 | -8.74  | 0 | 0  | OG1  | HN  |
| THR94  | Light | GLU3 | 2.00 | -7.65  | 0 | -1 | HG1  | HN  |
| TYR92  | Light | HIS6 | 2.16 | -4.95  | 0 | 0  | O    | HN  |
| SER93  | Light | ARG5 | 2.28 | -5.12  | 0 | 1  | HB1  | HB2 |
| SER93  | Light | ALA2 | 2.30 | 0.07   | 0 | 1  | HB2  | HB3 |
| TYR91  | Light | HIS6 | 2.30 | -1.52  | 0 | 0  | O    | HD2 |
| SER93  | Light | PHE4 | 2.38 | -3.24  | 0 | 0  | HA   | O   |
| TYR92  | Light | ARG5 | 2.50 | -13.16 | 0 | 1  | O    | HA  |
| THR94  | Light | ALA2 | 2.53 | -0.72  | 0 | 1  | HN   | HB3 |
| TYR32  | Light | HIS6 | 3.36 | -2.79  | 0 | 0  | HH   | HB2 |
| SER93  | Light | HIS6 | 3.71 | -1.30  | 0 | 0  | HA   | HN  |
| THR94  | Light | ARG5 | 3.98 | -1.26  | 0 | 1  | HN   | HA  |
| TYR92  | Light | PHE4 | 4.06 | -1.47  | 0 | 0  | O    | HD1 |
| TYR32  | Light | ASP7 | 4.13 | -2.23  | 0 | -2 | HH   | OT2 |
| PRO95  | Light | ALA2 | 4.35 | -1.15  | 0 | 1  | HD1  | HA  |
| LEU96  | Light | PHE4 | 4.64 | -0.34  | 0 | 0  | HD21 | HD1 |
| TYR92  | Light | ASP7 | 4.71 | 0.08   | 0 | -2 | HE1  | HA  |
| ASP1   | Light | ARG5 | 4.88 | -0.66  | 0 | 1  | OD1  | HD2 |
| ILE2   | Light | ALA2 | 5.00 | -0.46  | 0 | 1  | HN   | HB1 |
| TYR91  | Light | PHE4 | 5.01 | -0.30  | 0 | 0  | O    | HE1 |
| PRO95  | Light | GLU3 | 5.15 | -1.11  | 0 | -1 | N    | HN  |
| LEU96  | Light | HIS6 | 5.27 | -0.15  | 0 | 0  | HD22 | HD2 |
| SER93  | Light | GLU3 | 5.43 | 1.40   | 0 | -1 | HB2  | N   |
| TYR92  | Light | ALA2 | 5.56 | -0.07  | 0 | 1  | HE2  | HB1 |



|       |       |      |      |       |   |    |      |      |
|-------|-------|------|------|-------|---|----|------|------|
| THR94 | Light | HIS6 | 5.68 | -0.16 | 0 | 0  | HN   | HN   |
| TYR91 | Light | ARG5 | 5.69 | -0.27 | 0 | 1  | O    | HA   |
| ASP1  | Light | GLU3 | 5.69 | 0.08  | 0 | -1 | OD2  | HN   |
| PRO95 | Light | PHE4 | 5.83 | -0.27 | 0 | 0  | N    | HN   |
| GLN90 | Light | ALA2 | 6.10 | -0.06 | 0 | 1  | HE22 | HB1  |
| SER30 | Light | HIS6 | 6.11 | -0.11 | 0 | 0  | HB1  | HB1  |
| SER30 | Light | ASP7 | 6.32 | -0.14 | 0 | -2 | HB2  | OT1  |
| LEU96 | Light | ARG5 | 6.35 | -0.05 | 0 | 1  | HD21 | HA   |
| ILE2  | Light | ARG5 | 6.58 | -0.07 | 0 | 1  | HD3  | HB2  |
| GLN90 | Light | PHE4 | 6.61 | -0.06 | 0 | 0  | HE22 | O    |
| ASP1  | Light | PHE4 | 6.63 | -0.12 | 0 | 0  | HB1  | O    |
| GLN90 | Light | HIS6 | 6.65 | -0.10 | 0 | 0  | OE1  | HD2  |
| ILE29 | Light | HIS6 | 6.66 | -0.09 | 0 | 0  | O    | HB1  |
| LEU96 | Light | ALA2 | 6.76 | -0.01 | 0 | 1  | HD23 | HB3  |
| GLN90 | Light | ARG5 | 7.08 | -0.16 | 0 | 1  | OE1  | HA   |
| TYR32 | Light | ARG5 | 7.09 | -0.22 | 0 | 1  | HE1  | C    |
| ILE29 | Light | ARG5 | 7.32 | -0.16 | 0 | 1  | HG22 | HB2  |
| SER31 | Light | HIS6 | 7.34 | -0.09 | 0 | 0  | HN   | HB1  |
| TYR32 | Light | PHE4 | 7.37 | -0.06 | 0 | 0  | CE1  | HE1  |
| SER28 | Light | ARG5 | 7.39 | -0.24 | 0 | 1  | O    | HH11 |
| ILE2  | Light | PHE4 | 7.54 | -0.04 | 0 | 0  | HG12 | O    |
| SER93 | Light | ASP7 | 7.64 | -0.07 | 0 | -2 | HB1  | N    |
| THR97 | Light | ALA2 | 7.73 | -0.02 | 0 | 1  | HG21 | HB1  |
| ASN34 | Light | HIS6 | 7.76 | -0.02 | 0 | 0  | HD22 | HE2  |

**Table S9** – Quantum biochemistry details of FC MD5

| <b>Adu Residue</b> | <b>Adu Chain</b> | <b>A<math>\beta</math> Residue</b> | <b>Distance (Å)</b> | <b>Interaction Energy (kcal/mol)</b> | <b>Adu Residue Charge</b> | <b>A<math>\beta</math> Residue Charge</b> | <b>Adu Atom</b> | <b>A<math>\beta</math> Atom</b> |
|--------------------|------------------|------------------------------------|---------------------|--------------------------------------|---------------------------|-------------------------------------------|-----------------|---------------------------------|
| LYS65              | Heavy            | GLU3                               | 1.71                | -15.15                               | 1                         | -1                                        | HZ1             | OE2                             |
| PRO108             | Heavy            | HIS6                               | 1.90                | -5.56                                | 0                         | 0                                         | O               | HE2                             |
| TYR59              | Heavy            | PHE4                               | 2.09                | -2.14                                | 0                         | 0                                         | HE2             | HB1                             |
| GLY107             | Heavy            | HIS6                               | 2.64                | -1.65                                | 0                         | 0                                         | O               | HE1                             |
| TYR59              | Heavy            | GLU3                               | 2.66                | -11.26                               | 0                         | -1                                        | HB2             | HB1                             |
| TYR60              | Heavy            | GLU3                               | 2.76                | -1.72                                | 0                         | -1                                        | HN              | OE1                             |
| ILE102             | Heavy            | HIS6                               | 2.89                | -1.10                                | 0                         | 0                                         | HG23            | HE1                             |
| GLY107             | Heavy            | PHE4                               | 3.03                | -0.88                                | 0                         | 0                                         | HA1             | HZ                              |
| PRO108             | Heavy            | PHE4                               | 3.14                | -1.58                                | 0                         | 0                                         | HD1             | HE1                             |
| TRP52              | Heavy            | PHE4                               | 3.15                | -3.05                                | 0                         | 0                                         | HH2             | CD2                             |
| TYR109             | Heavy            | HIS6                               | 3.52                | -2.15                                | 0                         | 0                                         | HA              | HE2                             |
| ASP62              | Heavy            | GLU3                               | 3.70                | 2.76                                 | -1                        | -1                                        | OD2             | OE2                             |
| THR61              | Heavy            | GLU3                               | 4.60                | -0.40                                | 0                         | -1                                        | HA              | OE1                             |
| TRP47              | Heavy            | GLU3                               | 5.08                | -0.15                                | 0                         | -1                                        | HH2             | OE1                             |
| VAL50              | Heavy            | PHE4                               | 5.35                | -0.24                                | 0                         | 0                                         | HG12            | HB2                             |
| ARG106             | Heavy            | HIS6                               | 5.35                | 0.16                                 | 1                         | 0                                         | C               | HE1                             |
| GLY101             | Heavy            | HIS6                               | 5.51                | -0.06                                | 0                         | 0                                         | HA2             | HE1                             |
| TYR59              | Heavy            | ARG5                               | 5.67                | -0.27                                | 0                         | 1                                         | HE2             | HN                              |

|        |       |      |      |        |    |    |      |     |
|--------|-------|------|------|--------|----|----|------|-----|
| LYS58  | Heavy | GLU3 | 5.68 | -1.20  | 1  | -1 | O    | HB2 |
| TRP52  | Heavy | HIS6 | 5.81 | -0.15  | 0  | 0  | HZ2  | HE1 |
| TRP47  | Heavy | PHE4 | 5.92 | -0.13  | 0  | 0  | HH2  | HB2 |
| TRP52  | Heavy | ARG5 | 6.03 | -0.12  | 0  | 1  | HH2  | HN  |
| LYS57  | Heavy | GLU3 | 6.04 | -1.43  | 1  | -1 | HD2  | O   |
| LYS65  | Heavy | ALA2 | 6.07 | 2.12   | 1  | 1  | HZ1  | HA  |
| ILE102 | Heavy | PHE4 | 6.13 | -0.09  | 0  | 0  | HG21 | HZ  |
| GLY107 | Heavy | ASP7 | 6.14 | -0.10  | 0  | -2 | HA1  | HN  |
| TRP52  | Heavy | GLU3 | 6.18 | -0.05  | 0  | -1 | HH2  | O   |
| VAL50  | Heavy | GLU3 | 6.26 | -0.02  | 0  | -1 | HG13 | HB1 |
| ARG106 | Heavy | PHE4 | 6.28 | 0.07   | 1  | 0  | C    | HZ  |
| ASP99  | Heavy | HIS6 | 6.30 | -0.28  | -1 | 0  | OD2  | HE2 |
| ARG105 | Heavy | PHE4 | 6.32 | -0.05  | 1  | 0  | HB1  | HE2 |
| LYS57  | Heavy | PHE4 | 6.38 | -0.19  | 1  | 0  | HD2  | HB1 |
| TYR110 | Heavy | HIS6 | 6.43 | -0.13  | 0  | 0  | N    | HE2 |
| ASP62  | Heavy | ALA2 | 6.45 | -2.15  | -1 | 1  | OD2  | HA  |
| GLY103 | Heavy | HIS6 | 6.51 | -0.13  | 0  | 0  | HA1  | HE1 |
| TYR59  | Heavy | ALA2 | 6.65 | -0.21  | 0  | 1  | HB2  | HB1 |
| HIS35  | Heavy | HIS6 | 6.71 | -0.01  | 0  | 0  | HE1  | HE2 |
| GLY107 | Heavy | ARG5 | 6.85 | -0.11  | 0  | 1  | HA1  | O   |
| HIS35  | Heavy | PHE4 | 6.88 | -0.04  | 0  | 0  | HE1  | HD1 |
| ILE102 | Heavy | ASP7 | 6.89 | -0.06  | 0  | -2 | HG21 | HN  |
| TYR109 | Heavy | PHE4 | 6.93 | -0.11  | 0  | 0  | HA   | HE1 |
| LYS65  | Heavy | PHE4 | 6.96 | -0.21  | 1  | 0  | HZ1  | HN  |
| ALA49  | Heavy | GLU3 | 6.96 | -0.14  | 0  | -1 | HA   | OE1 |
| LYS58  | Heavy | PHE4 | 7.10 | -0.15  | 1  | 0  | C    | HB1 |
| PRO108 | Heavy | ARG5 | 7.16 | -0.38  | 0  | 1  | HD1  | C   |
| ARG105 | Heavy | HIS6 | 7.19 | -0.08  | 1  | 0  | O    | HE1 |
| VAL64  | Heavy | GLU3 | 7.25 | -0.21  | 0  | -1 | HG23 | OE1 |
| TRP47  | Heavy | ALA2 | 7.26 | -0.09  | 0  | 1  | HH2  | HB1 |
| ARG105 | Heavy | ASP7 | 7.33 | -1.79  | 1  | -2 | HB1  | OD1 |
| TYR60  | Heavy | PHE4 | 7.36 | -0.07  | 0  | 0  | HN   | HN  |
| TRP52  | Heavy | ASP7 | 7.40 | -0.11  | 0  | -2 | HZ2  | OD1 |
| VAL48  | Heavy | GLU3 | 7.45 | 0.11   | 0  | -1 | O    | OE1 |
| GLY103 | Heavy | ASP7 | 7.78 | -0.10  | 0  | -2 | HA1  | HB1 |
| GLY101 | Heavy | PHE4 | 7.82 | -0.01  | 0  | 0  | HA1  | HZ  |
| THR61  | Heavy | ALA2 | 7.85 | 0.22   | 0  | 1  | HA   | HB1 |
| PRO108 | Heavy | ASP7 | 7.88 | 0.35   | 0  | -2 | HD1  | HN  |
| VAL50  | Heavy | HIS6 | 7.90 | -0.01  | 0  | 0  | HG21 | HE2 |
| SER93  | Light | PHE4 | 1.80 | -10.50 | 0  | 0  | HG1  | O   |
| TYR92  | Light | HIS6 | 2.22 | -6.29  | 0  | 0  | O    | HN  |
| THR94  | Light | PHE4 | 2.23 | -4.55  | 0  | 0  | OG1  | HN  |
| THR94  | Light | ALA2 | 2.24 | -1.60  | 0  | 1  | HG1  | HB1 |
| THR94  | Light | GLU3 | 2.33 | -5.96  | 0  | -1 | HG1  | HN  |
| SER93  | Light | ALA2 | 2.41 | -0.79  | 0  | 1  | HG1  | HB3 |
| TYR91  | Light | HIS6 | 2.47 | -1.37  | 0  | 0  | O    | HD2 |
| SER93  | Light | ARG5 | 2.55 | -7.87  | 0  | 1  | HB2  | HA  |
| TYR32  | Light | HIS6 | 2.80 | -4.18  | 0  | 0  | HD2  | HD2 |

|       |       |      |      |        |   |    |      |     |
|-------|-------|------|------|--------|---|----|------|-----|
| TYR92 | Light | ARG5 | 3.02 | -11.86 | 0 | 1  | O    | HA  |
| SER93 | Light | HIS6 | 3.63 | -1.61  | 0 | 0  | HA   | HN  |
| LEU96 | Light | PHE4 | 3.75 | -0.48  | 0 | 0  | HD21 | HD1 |
| THR94 | Light | ARG5 | 3.95 | -1.00  | 0 | 1  | HN   | HA  |
| TYR92 | Light | PHE4 | 4.36 | -0.93  | 0 | 0  | O    | HD1 |
| PRO95 | Light | ALA2 | 4.71 | -0.53  | 0 | 1  | N    | HB1 |
| TYR91 | Light | PHE4 | 4.77 | -0.32  | 0 | 0  | O    | HE1 |
| SER93 | Light | GLU3 | 4.91 | 2.13   | 0 | -1 | HG1  | HN  |
| TYR32 | Light | ASP7 | 5.03 | -0.69  | 0 | -2 | HH   | OT1 |
| LEU96 | Light | HIS6 | 5.20 | -0.17  | 0 | 0  | HD21 | HD2 |
| TYR92 | Light | ASP7 | 5.29 | 0.46   | 0 | -2 | HE2  | OT2 |
| PRO95 | Light | GLU3 | 5.33 | -0.93  | 0 | -1 | HD2  | HN  |
| ASP1  | Light | ALA2 | 5.61 | -0.02  | 0 | 1  | HA   | HB2 |
| ILE2  | Light | ARG5 | 5.67 | -0.07  | 0 | 1  | HD1  | HG1 |
| THR94 | Light | HIS6 | 5.69 | -0.15  | 0 | 0  | HN   | HN  |
| TYR32 | Light | PHE4 | 5.77 | -0.15  | 0 | 0  | HE2  | HE1 |
| ILE2  | Light | ALA2 | 6.04 | -0.11  | 0 | 1  | HG11 | HB2 |
| PRO95 | Light | PHE4 | 6.14 | -0.28  | 0 | 0  | N    | HN  |
| LEU96 | Light | ARG5 | 6.27 | -0.07  | 0 | 1  | HD21 | HA  |
| TYR91 | Light | ARG5 | 6.37 | 0.07   | 0 | 1  | O    | HA  |
| GLN27 | Light | ARG5 | 6.39 | -0.31  | 0 | 1  | OE1  | HD2 |
| ASN34 | Light | HIS6 | 6.50 | -0.04  | 0 | 0  | HD22 | HE2 |
| SER30 | Light | HIS6 | 6.51 | -0.10  | 0 | 0  | HB1  | HB2 |
| ILE29 | Light | HIS6 | 6.69 | -0.10  | 0 | 0  | O    | HB1 |
| TYR92 | Light | ALA2 | 6.70 | -0.09  | 0 | 1  | O    | HB3 |
| ILE2  | Light | PHE4 | 6.74 | -0.05  | 0 | 0  | HD1  | O   |
| ILE2  | Light | HIS6 | 6.78 | -0.04  | 0 | 0  | HD1  | HN  |
| GLN90 | Light | ALA2 | 6.78 | -0.02  | 0 | 1  | HE22 | HB2 |
| GLN90 | Light | HIS6 | 6.83 | -0.12  | 0 | 0  | C    | HD2 |
| GLN90 | Light | PHE4 | 6.84 | -0.07  | 0 | 0  | HE22 | O   |
| GLN27 | Light | ALA2 | 7.05 | -0.04  | 0 | 1  | HE22 | HB2 |
| GLN90 | Light | ARG5 | 7.08 | -0.11  | 0 | 1  | HE22 | HA  |
| SER31 | Light | HIS6 | 7.16 | -0.16  | 0 | 0  | HG1  | HD2 |
| SER30 | Light | ASP7 | 7.20 | -0.30  | 0 | -2 | HG1  | OT2 |
| ILE29 | Light | ARG5 | 7.37 | -0.14  | 0 | 1  | HA   | HG1 |
| LEU96 | Light | ALA2 | 7.39 | -0.08  | 0 | 1  | HD23 | HB1 |
| TYR32 | Light | ARG5 | 7.58 | -0.33  | 0 | 1  | OH   | C   |
| SER93 | Light | ASP7 | 7.65 | -0.06  | 0 | -2 | HB2  | N   |
| SER28 | Light | ARG5 | 7.74 | -0.18  | 0 | 1  | O    | HD2 |
| LEU33 | Light | HIS6 | 7.80 | -0.05  | 0 | 0  | N    | HD2 |

**Table S10** – Quantum biochemistry details of FC MD6

| <b>Adu Residue</b> | <b>Adu Chain</b> | <b>A<math>\beta</math> Residue</b> | <b>Distance (Å)</b> | <b>Interaction Energy (kcal/mol)</b> | <b>Adu Residue Charge</b> | <b>A<math>\beta</math> Residue Charge</b> | <b>Adu Atom</b> | <b>A<math>\beta</math> Atom</b> |
|--------------------|------------------|------------------------------------|---------------------|--------------------------------------|---------------------------|-------------------------------------------|-----------------|---------------------------------|
| LYS57              | Heavy            | GLU3                               | 1.77                | -13.88                               | 1                         | -1                                        | HZ2             | OE1                             |
| TYR59              | Heavy            | GLU3                               | 1.81                | -10.78                               | 0                         | -1                                        | HH              | OE1                             |

|        |       |      |      |       |    |    |      |     |
|--------|-------|------|------|-------|----|----|------|-----|
| TYR59  | Heavy | PHE4 | 1.90 | -3.48 | 0  | 0  | HE2  | HB1 |
| ILE102 | Heavy | HIS6 | 1.91 | -0.08 | 0  | 0  | HG21 | HE1 |
| PRO108 | Heavy | HIS6 | 1.93 | -6.15 | 0  | 0  | O    | HE2 |
| GLY107 | Heavy | HIS6 | 2.32 | -3.29 | 0  | 0  | O    | HE1 |
| LYS57  | Heavy | PHE4 | 2.64 | -5.82 | 1  | 0  | HG1  | CD2 |
| TRP52  | Heavy | PHE4 | 2.67 | -6.44 | 0  | 0  | CE2  | HD2 |
| ALA104 | Heavy | ASP7 | 3.02 | -4.26 | 0  | -2 | HB3  | OD1 |
| ARG105 | Heavy | PHE4 | 3.16 | -6.19 | 1  | 0  | HD2  | CE1 |
| LYS57  | Heavy | ALA2 | 3.52 | 1.90  | 1  | 1  | HZ1  | H3  |
| THR56  | Heavy | PHE4 | 3.56 | -0.81 | 0  | 0  | OG1  | HE2 |
| TYR109 | Heavy | HIS6 | 3.77 | -1.59 | 0  | 0  | HA   | HE2 |
| ASP54  | Heavy | PHE4 | 3.88 | -0.61 | -1 | 0  | OD1  | HE2 |
| TRP52  | Heavy | ARG5 | 3.95 | -0.61 | 0  | 1  | HH2  | HA  |
| ARG105 | Heavy | ARG5 | 4.17 | 0.01  | 1  | 1  | HG1  | HN  |
| ARG105 | Heavy | ASP7 | 4.33 | -4.60 | 1  | -2 | HN   | OD1 |
| GLY103 | Heavy | HIS6 | 4.39 | -0.27 | 0  | 0  | HA1  | HE1 |
| ARG106 | Heavy | HIS6 | 4.53 | -1.74 | 1  | 0  | C    | HE1 |
| GLY101 | Heavy | HIS6 | 4.62 | 0.47  | 0  | 0  | HA2  | HE1 |
| TYR59  | Heavy | ALA2 | 4.78 | -0.39 | 0  | 1  | OH   | O   |
| ARG105 | Heavy | ALA2 | 4.90 | 1.14  | 1  | 1  | HH12 | HB2 |
| TYR59  | Heavy | ARG5 | 4.94 | -0.19 | 0  | 1  | HE2  | N   |
| GLY103 | Heavy | ASP7 | 5.13 | -2.08 | 0  | -2 | HA1  | HB1 |
| GLY107 | Heavy | PHE4 | 5.16 | -0.16 | 0  | 0  | HA1  | HB2 |
| TRP52  | Heavy | HIS6 | 5.23 | -0.56 | 0  | 0  | HH2  | N   |
| ARG105 | Heavy | HIS6 | 5.31 | -1.17 | 1  | 0  | HB1  | HA  |
| GLY107 | Heavy | ARG5 | 5.36 | -0.40 | 0  | 1  | HA1  | HA  |
| PHE53  | Heavy | PHE4 | 5.65 | -0.32 | 0  | 0  | HN   | HD2 |
| PRO108 | Heavy | ARG5 | 5.66 | -0.11 | 0  | 1  | HD1  | HA  |
| LYS58  | Heavy | GLU3 | 5.75 | -1.06 | 1  | -1 | HN   | OE1 |
| ARG105 | Heavy | GLU3 | 5.94 | -1.60 | 1  | -1 | HG1  | O   |
| ILE102 | Heavy | ASP7 | 5.96 | -0.13 | 0  | -2 | HG21 | HN  |
| ALA104 | Heavy | HIS6 | 5.97 | -0.19 | 0  | 0  | HN   | HA  |
| PRO108 | Heavy | PHE4 | 6.27 | -0.13 | 0  | 0  | HD1  | HB2 |
| ALA104 | Heavy | ARG5 | 6.34 | -0.04 | 0  | 1  | HB3  | O   |
| ASP99  | Heavy | HIS6 | 6.49 | -0.27 | -1 | 0  | OD2  | HE2 |
| ARG106 | Heavy | ASP7 | 6.50 | -2.39 | 1  | -2 | HN   | OD1 |
| ARG106 | Heavy | PHE4 | 6.53 | -0.23 | 1  | 0  | N    | HD2 |
| GLY107 | Heavy | ASP7 | 6.62 | -0.20 | 0  | -2 | HN   | HN  |
| TRP52  | Heavy | GLU3 | 6.75 | -0.27 | 0  | -1 | HZ3  | HB2 |
| TYR110 | Heavy | HIS6 | 6.86 | -0.09 | 0  | 0  | N    | HE2 |
| LYS65  | Heavy | GLU3 | 6.90 | -1.22 | 1  | -1 | HZ2  | HG1 |
| LYS58  | Heavy | PHE4 | 6.93 | -0.24 | 1  | 0  | HN   | HN  |
| VAL50  | Heavy | PHE4 | 7.05 | -0.04 | 0  | 0  | HG11 | HB1 |
| GLY55  | Heavy | PHE4 | 7.05 | -0.14 | 0  | 0  | HN   | HE2 |
| LYS57  | Heavy | ARG5 | 7.12 | 0.58  | 1  | 1  | HE1  | HN  |
| ARG106 | Heavy | ARG5 | 7.37 | 0.27  | 1  | 1  | HN   | O   |
| GLY103 | Heavy | ARG5 | 7.42 | 0.00  | 0  | 1  | HA1  | O   |
| HIS35  | Heavy | HIS6 | 7.43 | 0.00  | 0  | 0  | HE1  | HE2 |

|        |       |      |      |        |   |    |      |      |
|--------|-------|------|------|--------|---|----|------|------|
| TYR60  | Heavy | GLU3 | 7.45 | -0.03  | 0 | -1 | HN   | HG1  |
| TYR59  | Heavy | HIS6 | 7.64 | -0.05  | 0 | 0  | HE2  | N    |
| ILE51  | Heavy | PHE4 | 7.67 | -0.05  | 0 | 0  | C    | HD2  |
| ALA104 | Heavy | PHE4 | 7.68 | -0.19  | 0 | 0  | HB3  | HB2  |
| ILE102 | Heavy | ARG5 | 7.71 | -0.09  | 0 | 1  | O    | O    |
| ARG100 | Heavy | HIS6 | 7.77 | 0.05   | 1 | 0  | C    | HE1  |
| TRP52  | Heavy | ASP7 | 7.88 | -0.18  | 0 | -2 | HZ2  | OD1  |
| TYR32  | Light | ASP7 | 1.88 | -11.39 | 0 | -2 | HH   | OT1  |
| TYR92  | Light | HIS6 | 1.92 | -7.57  | 0 | 0  | O    | HN   |
| TYR32  | Light | HIS6 | 2.18 | -7.36  | 0 | 0  | HB2  | HD2  |
| SER93  | Light | ARG5 | 2.20 | -6.42  | 0 | 1  | HB2  | HB1  |
| TYR91  | Light | HIS6 | 2.26 | 1.07   | 0 | 0  | HB1  | HD2  |
| TYR92  | Light | ARG5 | 2.62 | -14.50 | 0 | 1  | O    | HB1  |
| TYR92  | Light | ASP7 | 3.59 | -2.46  | 0 | -2 | HE1  | OT2  |
| SER93  | Light | HIS6 | 3.67 | -2.03  | 0 | 0  | HA   | HN   |
| THR94  | Light | PHE4 | 3.75 | -1.86  | 0 | 0  | HG1  | O    |
| THR94  | Light | ARG5 | 3.87 | -1.45  | 0 | 1  | HN   | HB1  |
| SER30  | Light | ASP7 | 4.12 | -2.00  | 0 | -2 | HG1  | OT1  |
| SER93  | Light | PHE4 | 4.65 | -1.72  | 0 | 0  | HA   | O    |
| TYR91  | Light | ARG5 | 4.87 | -1.17  | 0 | 1  | O    | HA   |
| THR94  | Light | GLU3 | 4.92 | -0.08  | 0 | -1 | HG1  | HB2  |
| LEU96  | Light | HIS6 | 5.20 | -0.16  | 0 | 0  | HD22 | HD2  |
| GLN90  | Light | HIS6 | 5.32 | -0.10  | 0 | 0  | C    | HD2  |
| ILE2   | Light | ARG5 | 5.45 | -0.10  | 0 | 1  | HD3  | HD2  |
| THR94  | Light | HIS6 | 5.49 | -0.18  | 0 | 0  | HN   | HN   |
| SER30  | Light | HIS6 | 5.56 | -0.17  | 0 | 0  | HB1  | HB2  |
| ILE29  | Light | HIS6 | 5.68 | -0.21  | 0 | 0  | O    | HB1  |
| TYR92  | Light | PHE4 | 5.70 | -0.44  | 0 | 0  | O    | O    |
| LEU33  | Light | HIS6 | 5.91 | -0.24  | 0 | 0  | N    | HD2  |
| LEU96  | Light | ARG5 | 5.96 | -0.05  | 0 | 1  | HD21 | HA   |
| SER31  | Light | ASP7 | 6.21 | -0.69  | 0 | -2 | HN   | OT1  |
| SER31  | Light | HIS6 | 6.44 | -0.08  | 0 | 0  | HG1  | HB2  |
| LEU96  | Light | PHE4 | 6.68 | -0.11  | 0 | 0  | HD21 | O    |
| SER93  | Light | GLU3 | 6.74 | -0.08  | 0 | -1 | OG   | HB2  |
| GLN27  | Light | ARG5 | 6.75 | -0.07  | 0 | 1  | HE22 | HH21 |
| ASN34  | Light | HIS6 | 6.78 | -0.09  | 0 | 0  | HD22 | HE2  |
| ILE29  | Light | ASP7 | 6.87 | 0.08   | 0 | -2 | O    | OT1  |
| TYR91  | Light | PHE4 | 6.89 | -0.06  | 0 | 0  | O    | O    |
| TYR32  | Light | ARG5 | 7.05 | -0.32  | 0 | 1  | HH   | O    |
| GLN90  | Light | ARG5 | 7.37 | -0.10  | 0 | 1  | OE1  | HB1  |
| TYR91  | Light | ASP7 | 7.40 | 0.08   | 0 | -2 | O    | N    |
| ILE2   | Light | HIS6 | 7.50 | -0.04  | 0 | 0  | HD3  | HN   |
| ILE29  | Light | ARG5 | 7.62 | -0.17  | 0 | 1  | HG22 | HD2  |
| SER93  | Light | ASP7 | 7.65 | 0.06   | 0 | -2 | HB2  | N    |
| ALA50  | Light | HIS6 | 7.88 | 0.00   | 0 | 0  | HA   | HE2  |
| GLN89  | Light | HIS6 | 7.92 | -0.05  | 0 | 0  | O    | HD2  |
| PRO95  | Light | ARG5 | 7.99 | -0.25  | 0 | 1  | N    | HB1  |

**Table S11** – Quantum biochemistry details of FC LMD-Mut

| <b>Adu Residue</b> | <b>Adu Chain</b> | <b>A<math>\beta</math> Residue</b> | <b>Distance (Å)</b> | <b>Interaction Energy (kcal/mol)</b> | <b>Adu Residue Charge</b> | <b>A<math>\beta</math> Residue Charge</b> | <b>Adu Atom</b> | <b>A<math>\beta</math> Atom</b> |
|--------------------|------------------|------------------------------------|---------------------|--------------------------------------|---------------------------|-------------------------------------------|-----------------|---------------------------------|
| LYS65              | Heavy            | GLU3                               | 1.58                | -13.71                               | 1                         | -1                                        | HZ2             | OE2                             |
| PRO108             | Heavy            | HIS6                               | 2.22                | -5.12                                | 0                         | 0                                         | O               | HE2                             |
| TYR59              | Heavy            | GLU3                               | 2.23                | -4.87                                | 0                         | -1                                        | HD2             | HB2                             |
| PRO108             | Heavy            | PHE4                               | 2.26                | -2.19                                | 0                         | 0                                         | HD1             | HZ                              |
| TRP52              | Heavy            | PHE4                               | 2.82                | -2.16                                | 0                         | 0                                         | HH2             | HZ                              |
| GLY107             | Heavy            | PHE4                               | 3.07                | -0.30                                | 0                         | 0                                         | HA1             | HZ                              |
| TYR59              | Heavy            | PHE4                               | 3.23                | -4.15                                | 0                         | 0                                         | CE2             | HB1                             |
| ILE102             | Heavy            | HIS6                               | 3.29                | -0.96                                | 0                         | 0                                         | HG21            | HE1                             |
| GLY107             | Heavy            | HIS6                               | 3.57                | -0.91                                | 0                         | 0                                         | HA1             | HE1                             |
| TYR60              | Heavy            | GLU3                               | 3.84                | -0.52                                | 0                         | -1                                        | HN              | OE2                             |
| TYR109             | Heavy            | HIS6                               | 4.01                | -1.38                                | 0                         | 0                                         | HA              | HE2                             |
| ASP62              | Heavy            | GLU3                               | 4.39                | 1.38                                 | -1                        | -1                                        | OD1             | OE2                             |
| VAL50              | Heavy            | PHE4                               | 4.80                | -0.32                                | 0                         | 0                                         | HG11            | HD1                             |
| TRP47              | Heavy            | GLU3                               | 5.34                | -0.29                                | 0                         | -1                                        | HH2             | OE2                             |
| GLY103             | Heavy            | HIS6                               | 5.35                | -0.19                                | 0                         | 0                                         | HA1             | HE1                             |
| TRP52              | Heavy            | HIS6                               | 5.44                | -0.16                                | 0                         | 0                                         | HH2             | HE1                             |
| TRP47              | Heavy            | PHE4                               | 5.45                | -0.18                                | 0                         | 0                                         | HH2             | HB2                             |
| THR61              | Heavy            | GLU3                               | 5.70                | 0.17                                 | 0                         | -1                                        | HA              | OE2                             |
| GLY101             | Heavy            | HIS6                               | 5.86                | 0.00                                 | 0                         | 0                                         | HA2             | HE2                             |
| LYS57              | Heavy            | PHE4                               | 5.86                | -0.27                                | 1                         | 0                                         | HE2             | HB1                             |
| ARG106             | Heavy            | HIS6                               | 5.87                | 0.04                                 | 1                         | 0                                         | C               | HE1                             |
| LYS58              | Heavy            | GLU3                               | 5.89                | -1.08                                | 1                         | -1                                        | O               | HB2                             |
| LYS57              | Heavy            | GLU3                               | 5.99                | -1.95                                | 1                         | -1                                        | HE2             | HB2                             |
| ILE102             | Heavy            | PHE4                               | 6.12                | -0.07                                | 0                         | 0                                         | HG21            | HZ                              |
| ARG106             | Heavy            | PHE4                               | 6.30                | 0.13                                 | 1                         | 0                                         | C               | HZ                              |
| TYR59              | Heavy            | ALA2                               | 6.33                | 0.03                                 | 0                         | 1                                         | HE2             | O                               |
| HIS35              | Heavy            | PHE4                               | 6.43                | -0.04                                | 0                         | 0                                         | HE1             | HE1                             |
| ARG105             | Heavy            | PHE4                               | 6.60                | -0.04                                | 1                         | 0                                         | HB1             | HE2                             |
| LYS65              | Heavy            | ALA2                               | 6.60                | 1.89                                 | 1                         | 1                                         | HZ2             | HB3                             |
| ASP99              | Heavy            | HIS6                               | 6.66                | -0.21                                | -1                        | 0                                         | OD1             | HE2                             |
| ASP62              | Heavy            | ALA2                               | 6.67                | -1.62                                | -1                        | 1                                         | OD2             | HA                              |
| TYR109             | Heavy            | PHE4                               | 6.68                | -0.09                                | 0                         | 0                                         | N               | HE1                             |
| TYR59              | Heavy            | ARG5                               | 6.71                | -0.35                                | 0                         | 1                                         | OH              | HN                              |
| TYR110             | Heavy            | HIS6                               | 6.80                | -0.10                                | 0                         | 0                                         | N               | HE2                             |
| LYS65              | Heavy            | PHE4                               | 6.82                | -0.28                                | 1                         | 0                                         | HZ2             | HN                              |
| PRO108             | Heavy            | ARG5                               | 6.84                | -0.18                                | 0                         | 1                                         | HG2             | HA                              |
| LYS58              | Heavy            | PHE4                               | 6.92                | -0.16                                | 1                         | 0                                         | O               | HB1                             |
| TRP52              | Heavy            | ARG5                               | 7.02                | -0.13                                | 0                         | 1                                         | HH2             | HN                              |
| VAL50              | Heavy            | GLU3                               | 7.06                | 0.01                                 | 0                         | -1                                        | HG12            | HB1                             |
| TRP47              | Heavy            | ALA2                               | 7.09                | -0.09                                | 0                         | 1                                         | HZ3             | HB3                             |
| GLY101             | Heavy            | PHE4                               | 7.29                | -0.01                                | 0                         | 0                                         | HA2             | HZ                              |
| ARG105             | Heavy            | HIS6                               | 7.44                | -0.06                                | 1                         | 0                                         | C               | HE1                             |
| ASP99              | Heavy            | PHE4                               | 7.47                | -0.02                                | -1                        | 0                                         | OD2             | HE1                             |

|        |       |      |      |       |   |    |      |     |
|--------|-------|------|------|-------|---|----|------|-----|
| TYR60  | Heavy | PHE4 | 7.61 | -0.07 | 0 | 0  | O    | HB2 |
| GLY103 | Heavy | PHE4 | 7.64 | -0.01 | 0 | 0  | HA1  | HZ  |
| GLY107 | Heavy | ARG5 | 7.70 | 0.04  | 0 | 1  | HA1  | O   |
| TRP52  | Heavy | GLU3 | 7.70 | 0.00  | 0 | -1 | HZ3  | O   |
| HIS35  | Heavy | HIS6 | 7.82 | 0.00  | 0 | 0  | HE1  | HE2 |
| TYR60  | Heavy | ALA2 | 7.85 | -0.24 | 0 | 1  | O    | HB3 |
| ALA104 | Heavy | HIS6 | 7.89 | -0.02 | 0 | 0  | HN   | HE1 |
| ALA49  | Heavy | GLU3 | 7.91 | -0.14 | 0 | -1 | HA   | OE2 |
| THR61  | Heavy | ALA2 | 7.96 | -0.05 | 0 | 1  | HA   | HB3 |
| TYR92  | Light | ASP7 | 1.78 | -8.72 | 0 | -2 | HH   | OD2 |
| THR94  | Light | PHE4 | 1.80 | -4.78 | 0 | 0  | HN   | O   |
| TYR92  | Light | HIS6 | 1.87 | -8.34 | 0 | 0  | O    | HN  |
| SER93  | Light | ARG5 | 2.16 | -3.89 | 0 | 1  | HA   | HA  |
| TYR91  | Light | HIS6 | 2.31 | -1.62 | 0 | 0  | O    | HD2 |
| TYR92  | Light | ARG5 | 2.40 | -9.59 | 0 | 1  | O    | HA  |
| SER93  | Light | PHE4 | 2.71 | -5.45 | 0 | 0  | HA   | O   |
| THR94  | Light | ALA2 | 2.87 | -1.93 | 0 | 1  | HG1  | HB3 |
| THR94  | Light | GLU3 | 2.88 | -2.05 | 0 | -1 | HG1  | HB1 |
| TYR32  | Light | HIS6 | 2.95 | -5.52 | 0 | 0  | OH   | HB2 |
| SER93  | Light | ALA2 | 3.11 | -0.98 | 0 | 1  | OG   | HB2 |
| LEU96  | Light | PHE4 | 3.26 | -0.75 | 0 | 0  | HD22 | HD1 |
| THR94  | Light | ARG5 | 3.29 | -2.22 | 0 | 1  | HN   | HA  |
| SER93  | Light | HIS6 | 3.69 | -1.43 | 0 | 0  | HA   | HN  |
| PRO95  | Light | ALA2 | 4.21 | -0.27 | 0 | 1  | HD2  | HB3 |
| TYR92  | Light | PHE4 | 4.48 | -2.23 | 0 | 0  | O    | O   |
| TYR91  | Light | PHE4 | 4.76 | -0.25 | 0 | 0  | O    | HE1 |
| TYR32  | Light | ASP7 | 4.80 | -0.40 | 0 | -2 | HH   | HA  |
| LEU96  | Light | HIS6 | 5.19 | -0.12 | 0 | 0  | HD23 | HD2 |
| TYR91  | Light | ARG5 | 5.30 | -0.13 | 0 | 1  | O    | HA  |
| LEU96  | Light | ARG5 | 5.39 | -0.11 | 0 | 1  | HD22 | HA  |
| THR94  | Light | HIS6 | 5.48 | -0.18 | 0 | 0  | HN   | HN  |
| PRO95  | Light | GLU3 | 5.54 | -0.29 | 0 | -1 | HD2  | HN  |
| SER93  | Light | GLU3 | 5.86 | -0.01 | 0 | -1 | HG1  | HN  |
| SER30  | Light | HIS6 | 5.95 | -0.17 | 0 | 0  | HB1  | HB1 |
| PRO95  | Light | PHE4 | 5.96 | -0.29 | 0 | 0  | N    | O   |
| ASP1   | Light | ALA2 | 6.26 | 0.06  | 0 | 1  | HA   | HB1 |
| ILE2   | Light | ARG5 | 6.33 | -0.03 | 0 | 1  | HD1  | HB1 |
| ILE29  | Light | HIS6 | 6.46 | -0.11 | 0 | 0  | O    | HB1 |
| SER93  | Light | ASP7 | 6.51 | 0.01  | 0 | -2 | HB2  | OD2 |
| ILE2   | Light | ALA2 | 6.87 | -0.05 | 0 | 1  | HD1  | HB1 |
| GLN90  | Light | ARG5 | 6.92 | -0.10 | 0 | 1  | OE1  | HB1 |
| GLN90  | Light | PHE4 | 6.96 | -0.06 | 0 | 0  | HE22 | O   |
| TYR32  | Light | ARG5 | 6.97 | -0.44 | 0 | 1  | HE1  | HB1 |
| TYR92  | Light | ALA2 | 7.00 | -0.18 | 0 | 1  | O    | HB2 |
| GLN90  | Light | HIS6 | 7.00 | -0.11 | 0 | 0  | C    | HD2 |
| ILE29  | Light | ARG5 | 7.04 | -0.06 | 0 | 1  | HA   | HB1 |
| ASN34  | Light | HIS6 | 7.08 | -0.01 | 0 | 0  | HD22 | HE2 |
| SER30  | Light | ASP7 | 7.32 | -0.19 | 0 | -2 | HB2  | HA  |

|       |       |      |      |       |   |    |      |     |
|-------|-------|------|------|-------|---|----|------|-----|
| TYR32 | Light | PHE4 | 7.33 | -0.07 | 0 | 0  | HB2  | HE1 |
| SER31 | Light | HIS6 | 7.37 | -0.33 | 0 | 0  | HN   | HB1 |
| PRO95 | Light | ARG5 | 7.64 | -0.18 | 0 | 1  | N    | HB2 |
| GLN90 | Light | ALA2 | 7.66 | -0.02 | 0 | 1  | HE22 | HB3 |
| SER28 | Light | ARG5 | 7.72 | -0.12 | 0 | 1  | O    | HB1 |
| ILE2  | Light | PHE4 | 7.73 | -0.03 | 0 | 0  | HD1  | O   |
| LEU33 | Light | HIS6 | 7.75 | -0.05 | 0 | 0  | N    | HD2 |
| LEU96 | Light | GLU3 | 7.85 | -0.05 | 0 | -1 | HD22 | HB1 |
| LEU96 | Light | ALA2 | 7.87 | -0.06 | 0 | 1  | N    | HB3 |

**Table S12** – Quantum biochemistry details of RC MD2-#0

| <b>Adu Residue</b> | <b>Adu Chain</b> | <b>A<math>\beta</math> Residue</b> | <b>Distance (Å)</b> | <b>Interaction Energy (kcal/mol)</b> | <b>Adu Residue Charge</b> | <b>A<math>\beta</math> Residue Charge</b> | <b>Adu Atom</b> | <b>A<math>\beta</math> Atom</b> |
|--------------------|------------------|------------------------------------|---------------------|--------------------------------------|---------------------------|-------------------------------------------|-----------------|---------------------------------|
| LYS65              | Heavy            | GLU3                               | 1.69                | -10.56                               | 1                         | -1                                        | HZ3             | OE1                             |
| PRO108             | Heavy            | HIS6                               | 1.70                | -3.27                                | 0                         | 0                                         | O               | HE2                             |
| GLY107             | Heavy            | HIS6                               | 2.25                | -1.25                                | 0                         | 0                                         | HA3             | HE1                             |
| TYR59              | Heavy            | GLU3                               | 2.25                | -2.93                                | 0                         | -1                                        | HE1             | HB2                             |
| ILE102             | Heavy            | HIS6                               | 2.47                | -1.70                                | 0                         | 0                                         | HG21            | HE1                             |
| ARG105             | Heavy            | ASP7                               | 2.61                | -4.49                                | 1                         | -2                                        | HH21            | HB3                             |
| TYR59              | Heavy            | PHE4                               | 2.71                | -4.39                                | 0                         | 0                                         | HH              | HD2                             |
| GLY107             | Heavy            | PHE4                               | 2.72                | -1.27                                | 0                         | 0                                         | HA3             | HE1                             |
| ARG105             | Heavy            | PHE4                               | 2.76                | -1.64                                | 1                         | 0                                         | HB3             | HE2                             |
| TYR109             | Heavy            | HIS6                               | 3.06                | -2.47                                | 0                         | 0                                         | HA              | HE2                             |
| TRP52              | Heavy            | PHE4                               | 3.16                | -3.28                                | 0                         | 0                                         | HH2             | CD1                             |
| PRO108             | Heavy            | PHE4                               | 3.26                | -1.50                                | 0                         | 0                                         | HD3             | HD1                             |
| TYR60              | Heavy            | GLU3                               | 4.25                | 0.12                                 | 0                         | -1                                        | H               | OE1                             |
| ASP62              | Heavy            | GLU3                               | 4.27                | 1.93                                 | -1                        | -1                                        | OD1             | OE1                             |
| ARG106             | Heavy            | HIS6                               | 4.37                | -0.07                                | 1                         | 0                                         | C               | HE1                             |
| LYS57              | Heavy            | PHE4                               | 4.72                | -0.29                                | 1                         | 0                                         | HE2             | HD2                             |
| ARG106             | Heavy            | PHE4                               | 4.75                | 0.01                                 | 1                         | 0                                         | N               | HZ                              |
| GLY101             | Heavy            | HIS6                               | 4.85                | -0.23                                | 0                         | 0                                         | HA2             | HE1                             |
| GLY103             | Heavy            | HIS6                               | 5.04                | -0.06                                | 0                         | 0                                         | HA3             | HE1                             |
| ILE102             | Heavy            | PHE4                               | 5.19                | -0.19                                | 0                         | 0                                         | O               | HZ                              |
| ARG105             | Heavy            | HIS6                               | 5.37                | -0.43                                | 1                         | 0                                         | HD3             | HA                              |
| GLY103             | Heavy            | ASP7                               | 5.50                | -0.33                                | 0                         | -2                                        | HA3             | OXT                             |
| TRP52              | Heavy            | HIS6                               | 5.58                | -0.14                                | 0                         | 0                                         | HZ2             | HE1                             |
| ARG105             | Heavy            | ARG5                               | 5.66                | 0.85                                 | 1                         | 1                                         | HD3             | O                               |
| VAL50              | Heavy            | PHE4                               | 5.73                | -0.15                                | 0                         | 0                                         | HG11            | HD1                             |
| ALA104             | Heavy            | ASP7                               | 5.80                | -0.50                                | 0                         | -2                                        | H               | OXT                             |
| TYR59              | Heavy            | ARG5                               | 5.92                | -0.26                                | 0                         | 1                                         | HH              | H                               |
| ILE102             | Heavy            | ASP7                               | 6.02                | -0.07                                | 0                         | -2                                        | HG22            | H                               |
| THR61              | Heavy            | GLU3                               | 6.03                | 0.16                                 | 0                         | -1                                        | HA              | OE1                             |
| GLY103             | Heavy            | PHE4                               | 6.11                | -0.05                                | 0                         | 0                                         | HA3             | HZ                              |
| TYR110             | Heavy            | HIS6                               | 6.14                | -0.18                                | 0                         | 0                                         | N               | HE2                             |
| TRP47              | Heavy            | PHE4                               | 6.15                | -0.10                                | 0                         | 0                                         | HH2             | HB2                             |
| TRP52              | Heavy            | ARG5                               | 6.18                | -0.13                                | 0                         | 1                                         | HH2             | H                               |



|        |       |      |      |       |    |    |      |     |
|--------|-------|------|------|-------|----|----|------|-----|
| ASP99  | Heavy | HIS6 | 6.25 | -0.23 | -1 | 0  | OD2  | HE2 |
| TRP47  | Heavy | GLU3 | 6.26 | -0.01 | 0  | -1 | HH2  | HB3 |
| TYR59  | Heavy | ALA2 | 6.27 | 0.11  | 0  | 1  | HE1  | C   |
| LYS57  | Heavy | GLU3 | 6.37 | -1.49 | 1  | -1 | HZ2  | HB2 |
| LYS58  | Heavy | GLU3 | 6.38 | -0.86 | 1  | -1 | O    | OE2 |
| GLY107 | Heavy | ARG5 | 6.38 | -0.04 | 0  | 1  | HA3  | C   |
| ALA104 | Heavy | PHE4 | 6.66 | 0.06  | 0  | 0  | C    | HZ  |
| PRO108 | Heavy | ARG5 | 6.69 | -0.29 | 0  | 1  | HD3  | HA  |
| ASP62  | Heavy | ALA2 | 6.75 | -1.62 | -1 | 1  | OD1  | HA  |
| HIS35  | Heavy | PHE4 | 6.81 | -0.03 | 0  | 0  | HE1  | HD1 |
| HIS35  | Heavy | HIS6 | 6.83 | -0.01 | 0  | 0  | HE1  | HE2 |
| GLY107 | Heavy | ASP7 | 6.88 | -0.13 | 0  | -2 | H    | H   |
| ALA104 | Heavy | HIS6 | 6.95 | -0.09 | 0  | 0  | N    | HE1 |
| LYS65  | Heavy | ALA2 | 6.95 | 1.59  | 1  | 1  | HZ3  | HA  |
| LYS58  | Heavy | PHE4 | 6.98 | -0.11 | 1  | 0  | O    | HB3 |
| TYR109 | Heavy | PHE4 | 7.07 | -0.10 | 0  | 0  | HA   | HE1 |
| TRP52  | Heavy | GLU3 | 7.20 | -0.03 | 0  | -1 | HH2  | O   |
| LYS65  | Heavy | PHE4 | 7.31 | -0.18 | 1  | 0  | HZ3  | H   |
| ARG106 | Heavy | ASP7 | 7.38 | -1.34 | 1  | -2 | H    | H   |
| TYR60  | Heavy | PHE4 | 7.42 | -0.08 | 0  | 0  | H    | H   |
| GLY101 | Heavy | PHE4 | 7.46 | -0.01 | 0  | 0  | HA2  | HE1 |
| THR61  | Heavy | ALA2 | 7.86 | -0.03 | 0  | 1  | HA   | HA  |
| VAL50  | Heavy | GLU3 | 7.90 | 0.03  | 0  | -1 | HG12 | HB3 |
| TYR60  | Heavy | ALA2 | 7.93 | -0.22 | 0  | 1  | O    | HA  |
| ARG100 | Heavy | HIS6 | 7.93 | -0.02 | 1  | 0  | C    | HE1 |
| TRP47  | Heavy | ALA2 | 7.96 | -0.16 | 0  | 1  | HZ3  | HA  |
| ARG105 | Heavy | GLU3 | 7.99 | -0.67 | 1  | -1 | HG2  | O   |
| THR94  | Light | PHE4 | 2.04 | -3.29 | 0  | 0  | H    | O   |
| TYR92  | Light | HIS6 | 2.06 | -4.86 | 0  | 0  | O    | H   |
| ASP1   | Light | ALA2 | 2.06 | -3.88 | 0  | 1  | OD1  | H2  |
| SER93  | Light | ALA2 | 2.11 | -1.14 | 0  | 1  | HB2  | HB1 |
| SER93  | Light | ARG5 | 2.17 | -4.24 | 0  | 1  | HA   | HA  |
| SER93  | Light | PHE4 | 2.43 | -3.16 | 0  | 0  | HB2  | O   |
| TYR92  | Light | ARG5 | 2.44 | -6.73 | 0  | 1  | O    | HA  |
| TYR32  | Light | HIS6 | 2.48 | -5.19 | 0  | 0  | HH   | HB2 |
| SER91  | Light | HIS6 | 2.53 | -0.23 | 0  | 0  | O    | HD2 |
| THR94  | Light | GLU3 | 2.64 | -1.17 | 0  | -1 | HG1  | HB3 |
| THR94  | Light | ALA2 | 2.70 | -1.85 | 0  | 1  | O    | HB1 |
| SER93  | Light | HIS6 | 3.70 | -1.48 | 0  | 0  | HA   | H   |
| THR94  | Light | ARG5 | 3.83 | -1.59 | 0  | 1  | H    | HA  |
| PRO95  | Light | ALA2 | 4.29 | -0.53 | 0  | 1  | HD2  | HA  |
| LEU96  | Light | PHE4 | 4.34 | -0.32 | 0  | 0  | HD22 | HD1 |
| TYR92  | Light | PHE4 | 4.45 | -2.00 | 0  | 0  | O    | O   |
| TYR32  | Light | ASP7 | 4.48 | -0.49 | 0  | -2 | HH   | H   |
| TYR92  | Light | ASP7 | 4.70 | 0.23  | 0  | -2 | HE1  | HA  |
| ILE2   | Light | ALA2 | 4.82 | -0.46 | 0  | 1  | H    | HB2 |
| PRO95  | Light | GLU3 | 5.07 | -0.33 | 0  | -1 | HD2  | H   |
| ASP1   | Light | ARG5 | 5.11 | -0.74 | 0  | 1  | OD2  | HB2 |

|       |       |      |      |       |   |    |      |     |
|-------|-------|------|------|-------|---|----|------|-----|
| SER91 | Light | PHE4 | 5.15 | -0.22 | 0 | 0  | O    | HE1 |
| SER93 | Light | GLU3 | 5.30 | 0.15  | 0 | -1 | HB2  | N   |
| SER91 | Light | ARG5 | 5.54 | -0.03 | 0 | 1  | O    | HA  |
| TYR92 | Light | ALA2 | 5.69 | -0.15 | 0 | 1  | HE2  | HB3 |
| THR94 | Light | HIS6 | 5.76 | -0.10 | 0 | 0  | H    | H   |
| ASP1  | Light | GLU3 | 5.79 | -0.06 | 0 | -1 | H3   | H   |
| ILE2  | Light | ARG5 | 5.80 | -0.11 | 0 | 1  | HD12 | HB3 |
| PRO95 | Light | PHE4 | 5.82 | -0.09 | 0 | 0  | N    | H   |
| LEU96 | Light | HIS6 | 6.03 | -0.12 | 0 | 0  | HD22 | HE2 |
| LEU96 | Light | ARG5 | 6.13 | -0.07 | 0 | 1  | HD22 | HA  |
| LEU96 | Light | ALA2 | 6.22 | -0.06 | 0 | 1  | HD21 | HB1 |
| GLN90 | Light | ALA2 | 6.23 | -0.05 | 0 | 1  | HE22 | HB2 |
| SER30 | Light | HIS6 | 6.42 | -0.08 | 0 | 0  | HB3  | HB3 |
| ILE29 | Light | HIS6 | 6.49 | -0.13 | 0 | 0  | O    | HD2 |
| TYR32 | Light | ARG5 | 6.49 | -0.18 | 0 | 1  | HE1  | C   |
| ASN34 | Light | HIS6 | 6.50 | -0.02 | 0 | 0  | HD22 | HE2 |
| ASP1  | Light | PHE4 | 6.60 | -0.09 | 0 | 0  | OD2  | O   |
| GLN90 | Light | HIS6 | 6.66 | -0.10 | 0 | 0  | OE1  | HD2 |
| GLN90 | Light | PHE4 | 6.80 | -0.06 | 0 | 0  | HE22 | O   |
| GLN90 | Light | ARG5 | 6.94 | -0.09 | 0 | 1  | OE1  | HA  |
| ILE2  | Light | PHE4 | 7.03 | -0.04 | 0 | 0  | HG12 | O   |
| ILE29 | Light | ARG5 | 7.20 | -0.04 | 0 | 1  | HG23 | HB3 |
| TYR32 | Light | PHE4 | 7.25 | -0.08 | 0 | 0  | OH   | HE1 |
| ILE2  | Light | HIS6 | 7.27 | -0.07 | 0 | 0  | HD12 | H   |
| SER31 | Light | HIS6 | 7.33 | -0.10 | 0 | 0  | C    | HD2 |
| SER30 | Light | ASP7 | 7.43 | -0.13 | 0 | -2 | HB2  | O   |
| GLN27 | Light | ALA2 | 7.46 | -0.16 | 0 | 1  | OE1  | HB2 |
| LEU33 | Light | HIS6 | 7.58 | -0.05 | 0 | 0  | N    | HD2 |
| THR97 | Light | ALA2 | 7.95 | -0.05 | 0 | 1  | H    | HB2 |
| SER93 | Light | ASP7 | 7.97 | -0.04 | 0 | -2 | HB3  | N   |

**Table S13** – Quantum biochemistry details of RC MD2-#1

| Adu Residue | Adu Chain | A $\beta$ Residue | Distance (Å) | Interaction Energy (kcal/mol) | Adu Residue Charge | A $\beta$ Residue Charge | Adu Atom | A $\beta$ Atom |
|-------------|-----------|-------------------|--------------|-------------------------------|--------------------|--------------------------|----------|----------------|
| LYS65       | Heavy     | GLU3              | 1.61         | -14.19                        | 1                  | -1                       | HZ3      | OE1            |
| PRO108      | Heavy     | HIS6              | 2.06         | -3.17                         | 0                  | 0                        | O        | HE2            |
| ILE102      | Heavy     | HIS6              | 2.31         | -1.05                         | 0                  | 0                        | HG22     | HE1            |
| GLY107      | Heavy     | PHE4              | 2.33         | -1.13                         | 0                  | 0                        | HA3      | HE1            |
| GLY107      | Heavy     | HIS6              | 2.37         | -1.57                         | 0                  | 0                        | O        | HE1            |
| TYR59       | Heavy     | GLU3              | 2.39         | -2.89                         | 0                  | -1                       | HD1      | HB2            |
| TYR109      | Heavy     | HIS6              | 2.49         | -2.23                         | 0                  | 0                        | HA       | HE2            |
| PRO108      | Heavy     | PHE4              | 2.69         | -2.00                         | 0                  | 0                        | HD3      | HE1            |
| TRP52       | Heavy     | PHE4              | 2.92         | -2.85                         | 0                  | 0                        | HH2      | CE2            |
| TYR59       | Heavy     | PHE4              | 3.04         | -4.81                         | 0                  | 0                        | CZ       | HB3            |
| ARG105      | Heavy     | PHE4              | 3.28         | -1.17                         | 1                  | 0                        | HB3      | HZ             |
| ARG105      | Heavy     | ASP7              | 3.61         | -2.83                         | 1                  | -2                       | HB3      | OD1            |

|        |       |      |      |        |    |    |      |     |
|--------|-------|------|------|--------|----|----|------|-----|
| TYR60  | Heavy | GLU3 | 3.90 | 0.38   | 0  | -1 | O    | OE1 |
| GLY101 | Heavy | HIS6 | 4.00 | 0.06   | 0  | 0  | HA2  | HE1 |
| ASP62  | Heavy | GLU3 | 4.21 | 2.33   | -1 | -1 | OD2  | OE1 |
| ARG106 | Heavy | PHE4 | 4.35 | -0.32  | 1  | 0  | C    | HZ  |
| GLY103 | Heavy | ASP7 | 4.69 | -0.51  | 0  | -2 | HA3  | HB3 |
| ARG106 | Heavy | HIS6 | 4.72 | 0.03   | 1  | 0  | C    | HE1 |
| ALA104 | Heavy | ASP7 | 4.94 | -0.45  | 0  | -2 | HB1  | OD1 |
| ILE102 | Heavy | ASP7 | 5.23 | -0.11  | 0  | -2 | HG23 | H   |
| LYS57  | Heavy | PHE4 | 5.28 | -0.26  | 1  | 0  | HB2  | HD2 |
| ILE102 | Heavy | PHE4 | 5.40 | -0.14  | 0  | 0  | O    | HZ  |
| THR61  | Heavy | GLU3 | 5.48 | 0.22   | 0  | -1 | HA   | OE1 |
| GLY103 | Heavy | HIS6 | 5.54 | 0.00   | 0  | 0  | N    | HE1 |
| ARG105 | Heavy | HIS6 | 5.62 | -0.23  | 1  | 0  | HB3  | HA  |
| VAL50  | Heavy | PHE4 | 5.63 | -0.21  | 0  | 0  | HG12 | HB2 |
| LYS58  | Heavy | GLU3 | 5.63 | -0.92  | 1  | -1 | O    | HB2 |
| TYR110 | Heavy | HIS6 | 5.65 | -0.30  | 0  | 0  | N    | HE2 |
| GLY107 | Heavy | ARG5 | 5.81 | -0.17  | 0  | 1  | HA3  | O   |
| TRP47  | Heavy | PHE4 | 5.84 | -0.12  | 0  | 0  | HH2  | HB2 |
| TRP47  | Heavy | GLU3 | 5.85 | -0.05  | 0  | -1 | HH2  | HB3 |
| GLY107 | Heavy | ASP7 | 6.00 | -0.06  | 0  | -2 | H    | OD1 |
| LYS58  | Heavy | PHE4 | 6.03 | -0.14  | 1  | 0  | O    | HB3 |
| ARG106 | Heavy | ASP7 | 6.04 | -1.84  | 1  | -2 | H    | OD1 |
| ARG105 | Heavy | ARG5 | 6.15 | 0.64   | 1  | 1  | HB3  | O   |
| PRO108 | Heavy | ARG5 | 6.24 | -0.38  | 0  | 1  | HD3  | HA  |
| TYR109 | Heavy | PHE4 | 6.27 | -0.12  | 0  | 0  | HB3  | HE1 |
| ASP99  | Heavy | HIS6 | 6.31 | -0.26  | -1 | 0  | OD2  | HE2 |
| GLY103 | Heavy | PHE4 | 6.51 | -0.03  | 0  | 0  | HA3  | HZ  |
| TYR59  | Heavy | ALA2 | 6.51 | -0.07  | 0  | 1  | HE1  | C   |
| TRP52  | Heavy | ARG5 | 6.53 | -0.08  | 0  | 1  | HH2  | H   |
| TRP52  | Heavy | HIS6 | 6.58 | -0.10  | 0  | 0  | HH2  | HE1 |
| LYS57  | Heavy | GLU3 | 6.68 | -1.29  | 1  | -1 | HE2  | O   |
| TYR59  | Heavy | ARG5 | 6.69 | -0.20  | 0  | 1  | CZ   | H   |
| GLY101 | Heavy | PHE4 | 6.77 | -0.03  | 0  | 0  | HA3  | HZ  |
| LYS65  | Heavy | ALA2 | 6.83 | 1.58   | 1  | 1  | HZ3  | HA  |
| TYR60  | Heavy | PHE4 | 6.99 | -0.09  | 0  | 0  | H    | HB3 |
| ARG100 | Heavy | HIS6 | 7.08 | -0.01  | 1  | 0  | C    | HE1 |
| LYS65  | Heavy | PHE4 | 7.09 | -0.17  | 1  | 0  | HZ3  | H   |
| TRP52  | Heavy | ASP7 | 7.13 | -0.08  | 0  | -2 | HZ2  | OD1 |
| ALA104 | Heavy | PHE4 | 7.14 | 0.04   | 0  | 0  | C    | HZ  |
| TRP52  | Heavy | GLU3 | 7.16 | -0.03  | 0  | -1 | HH2  | O   |
| ARG105 | Heavy | GLU3 | 7.21 | -0.81  | 1  | -1 | HH11 | O   |
| ASP62  | Heavy | ALA2 | 7.36 | -1.37  | -1 | 1  | OD2  | HA  |
| VAL50  | Heavy | GLU3 | 7.36 | 0.03   | 0  | -1 | HG13 | HB3 |
| HIS35  | Heavy | HIS6 | 7.39 | 0.00   | 0  | 0  | HE1  | HE2 |
| HIS35  | Heavy | PHE4 | 7.65 | -0.03  | 0  | 0  | HE1  | HD1 |
| TRP47  | Heavy | ALA2 | 7.82 | -0.13  | 0  | 1  | HH2  | HB1 |
| ALA104 | Heavy | HIS6 | 7.84 | -0.03  | 0  | 0  | H    | ND1 |
| ASP1   | Light | ALA2 | 1.62 | -13.33 | 0  | 1  | OD2  | H3  |

|       |       |      |      |       |   |    |      |      |
|-------|-------|------|------|-------|---|----|------|------|
| THR94 | Light | PHE4 | 2.09 | -4.84 | 0 | 0  | HG21 | HB2  |
| THR94 | Light | ALA2 | 2.13 | -0.54 | 0 | 1  | H    | HB1  |
| TYR92 | Light | HIS6 | 2.14 | -5.79 | 0 | 0  | O    | H    |
| THR94 | Light | GLU3 | 2.27 | -1.67 | 0 | -1 | HG1  | HB3  |
| TYR92 | Light | ARG5 | 2.30 | -8.41 | 0 | 1  | OH   | HD2  |
| SER93 | Light | ALA2 | 2.32 | -1.34 | 0 | 1  | HB2  | HB3  |
| SER91 | Light | HIS6 | 2.44 | -0.06 | 0 | 0  | O    | HD2  |
| SER93 | Light | PHE4 | 2.50 | -4.26 | 0 | 0  | HA   | O    |
| SER93 | Light | ARG5 | 2.54 | -4.58 | 0 | 1  | HA   | HA   |
| TYR32 | Light | HIS6 | 2.65 | -4.00 | 0 | 0  | OH   | HB2  |
| SER93 | Light | HIS6 | 3.80 | -1.67 | 0 | 0  | HA   | H    |
| TYR32 | Light | ASP7 | 3.80 | -0.01 | 0 | -2 | HH   | OXT  |
| PRO95 | Light | GLU3 | 4.05 | -0.64 | 0 | -1 | HD2  | OE1  |
| TYR92 | Light | PHE4 | 4.16 | -1.57 | 0 | 0  | O    | HD1  |
| THR94 | Light | ARG5 | 4.17 | -0.94 | 0 | 1  | H    | HA   |
| LEU96 | Light | PHE4 | 4.30 | -0.38 | 0 | 0  | HD22 | HD1  |
| TYR92 | Light | ASP7 | 4.63 | 0.32  | 0 | -2 | HE1  | N    |
| ASP1  | Light | GLU3 | 4.65 | -0.26 | 0 | -1 | OD1  | H    |
| PRO95 | Light | ALA2 | 4.65 | -0.75 | 0 | 1  | HD2  | HA   |
| GLN27 | Light | ALA2 | 5.03 | 0.01  | 0 | 1  | HE22 | H3   |
| ILE2  | Light | ALA2 | 5.05 | -0.43 | 0 | 1  | H    | HB2  |
| SER93 | Light | GLU3 | 5.10 | 0.41  | 0 | -1 | HB2  | H    |
| SER91 | Light | PHE4 | 5.24 | -0.21 | 0 | 0  | O    | HE1  |
| ASP1  | Light | ARG5 | 5.38 | -0.65 | 0 | 1  | OD2  | HD3  |
| GLN27 | Light | ARG5 | 5.40 | 0.00  | 0 | 1  | HE22 | HH22 |
| TYR32 | Light | ARG5 | 5.53 | -0.48 | 0 | 1  | HE2  | HG3  |
| LEU96 | Light | HIS6 | 5.64 | -0.14 | 0 | 0  | HD23 | HE2  |
| PRO95 | Light | PHE4 | 5.76 | -0.13 | 0 | 0  | HD2  | H    |
| ASN34 | Light | HIS6 | 5.77 | -0.03 | 0 | 0  | HD22 | HE2  |
| SER91 | Light | ARG5 | 5.77 | -0.01 | 0 | 1  | O    | HA   |
| TYR92 | Light | ALA2 | 5.78 | -0.17 | 0 | 1  | O    | HB3  |
| ILE2  | Light | ARG5 | 5.81 | -0.07 | 0 | 1  | HD13 | HD3  |
| THR94 | Light | HIS6 | 6.02 | -0.08 | 0 | 0  | H    | H    |
| LEU96 | Light | ARG5 | 6.12 | -0.07 | 0 | 1  | HD22 | HA   |
| GLN90 | Light | ALA2 | 6.14 | -0.11 | 0 | 1  | HE22 | HB2  |
| SER30 | Light | HIS6 | 6.26 | -0.08 | 0 | 0  | HB3  | HB3  |
| GLN90 | Light | HIS6 | 6.28 | -0.11 | 0 | 0  | OE1  | HD2  |
| ASP1  | Light | PHE4 | 6.61 | -0.07 | 0 | 0  | OD1  | H    |
| GLN90 | Light | PHE4 | 6.70 | -0.06 | 0 | 0  | HE22 | O    |
| LEU96 | Light | ALA2 | 6.71 | -0.07 | 0 | 1  | HD21 | HB1  |
| ILE29 | Light | HIS6 | 6.83 | -0.10 | 0 | 0  | O    | HD2  |
| TYR32 | Light | PHE4 | 6.95 | -0.08 | 0 | 0  | HE1  | HE1  |
| GLN90 | Light | ARG5 | 7.03 | -0.15 | 0 | 1  | OE1  | HA   |
| ILE29 | Light | ARG5 | 7.08 | -0.09 | 0 | 1  | HA   | HD2  |
| SER30 | Light | ARG5 | 7.10 | -0.04 | 0 | 1  | HB3  | HD2  |
| SER28 | Light | ARG5 | 7.24 | -0.21 | 0 | 1  | O    | HD2  |
| ALA50 | Light | HIS6 | 7.36 | -0.01 | 0 | 0  | HB3  | HE2  |
| ILE2  | Light | PHE4 | 7.61 | -0.03 | 0 | 0  | HG12 | O    |

|       |       |      |      |       |   |    |    |     |
|-------|-------|------|------|-------|---|----|----|-----|
| LEU33 | Light | HIS6 | 7.77 | -0.06 | 0 | 0  | N  | HD2 |
| LEU96 | Light | GLU3 | 7.82 | -0.07 | 0 | -1 | HG | HB3 |
| SER31 | Light | HIS6 | 7.85 | -0.07 | 0 | 0  | C  | HD2 |
| ILE2  | Light | GLU3 | 7.89 | 0.04  | 0 | -1 | H  | H   |

**Table S14** – Quantum biochemistry details of RC MD2-#2

| <b>Adu Residue</b> | <b>Adu Chain</b> | <b>A<math>\beta</math> Residue</b> | <b>Distance (Å)</b> | <b>Interaction Energy (kcal/mol)</b> | <b>Adu Residue Charge</b> | <b>A<math>\beta</math> Residue Charge</b> | <b>Adu Atom</b> | <b>A<math>\beta</math> Atom</b> |
|--------------------|------------------|------------------------------------|---------------------|--------------------------------------|---------------------------|-------------------------------------------|-----------------|---------------------------------|
| ARG105             | Heavy            | ARG5                               | 1.68                | -3.02                                | 1                         | 1                                         | HH12            | O                               |
| LYS65              | Heavy            | GLU3                               | 1.94                | -10.33                               | 1                         | -1                                        | HZ3             | OE2                             |
| ARG105             | Heavy            | ASP7                               | 1.94                | -14.36                               | 1                         | -2                                        | HH21            | OD2                             |
| PRO108             | Heavy            | HIS6                               | 2.01                | -5.56                                | 0                         | 0                                         | O               | HE2                             |
| GLY107             | Heavy            | HIS6                               | 2.11                | -1.21                                | 0                         | 0                                         | O               | HE1                             |
| ARG105             | Heavy            | PHE4                               | 2.16                | -2.24                                | 1                         | 0                                         | HD2             | HE2                             |
| GLY107             | Heavy            | PHE4                               | 2.23                | -0.72                                | 0                         | 0                                         | HA3             | HE1                             |
| TYR59              | Heavy            | GLU3                               | 2.35                | -2.82                                | 0                         | -1                                        | HD1             | HB2                             |
| PRO108             | Heavy            | PHE4                               | 2.41                | -1.90                                | 0                         | 0                                         | HD3             | HE1                             |
| TYR59              | Heavy            | PHE4                               | 2.55                | -5.21                                | 0                         | 0                                         | OH              | HD2                             |
| ILE102             | Heavy            | HIS6                               | 2.55                | -1.33                                | 0                         | 0                                         | HG21            | HE1                             |
| TRP52              | Heavy            | PHE4                               | 2.69                | -3.50                                | 0                         | 0                                         | HZ2             | HZ                              |
| ARG105             | Heavy            | HIS6                               | 2.84                | -2.74                                | 1                         | 0                                         | HH12            | HA                              |
| TYR109             | Heavy            | HIS6                               | 2.85                | -2.25                                | 0                         | 0                                         | HA              | HE2                             |
| TYR60              | Heavy            | GLU3                               | 3.78                | 0.71                                 | 0                         | -1                                        | O               | OE1                             |
| ASP62              | Heavy            | GLU3                               | 4.14                | 2.39                                 | -1                        | -1                                        | OD2             | OE1                             |
| GLY101             | Heavy            | HIS6                               | 4.25                | 0.17                                 | 0                         | 0                                         | HA2             | HE1                             |
| ARG106             | Heavy            | PHE4                               | 4.54                | -0.06                                | 1                         | 0                                         | C               | HZ                              |
| ARG106             | Heavy            | HIS6                               | 4.89                | 0.04                                 | 1                         | 0                                         | C               | HE1                             |
| LYS57              | Heavy            | PHE4                               | 5.06                | -0.29                                | 1                         | 0                                         | HG3             | HE2                             |
| THR61              | Heavy            | GLU3                               | 5.25                | 0.19                                 | 0                         | -1                                        | HA              | OE1                             |
| VAL50              | Heavy            | PHE4                               | 5.38                | -0.21                                | 0                         | 0                                         | HG12            | HB2                             |
| GLY103             | Heavy            | HIS6                               | 5.48                | -0.08                                | 0                         | 0                                         | N               | HE1                             |
| GLY107             | Heavy            | ARG5                               | 5.48                | -0.24                                | 0                         | 1                                         | HA3             | O                               |
| TRP47              | Heavy            | GLU3                               | 5.58                | -0.06                                | 0                         | -1                                        | HH2             | HB3                             |
| ILE102             | Heavy            | PHE4                               | 5.68                | -0.13                                | 0                         | 0                                         | O               | HZ                              |
| TRP47              | Heavy            | PHE4                               | 5.77                | -0.15                                | 0                         | 0                                         | HH2             | HB2                             |
| TRP52              | Heavy            | ARG5                               | 5.91                | -0.13                                | 0                         | 1                                         | HH2             | H                               |
| TYR110             | Heavy            | HIS6                               | 6.00                | -0.15                                | 0                         | 0                                         | N               | HE2                             |
| TRP52              | Heavy            | HIS6                               | 6.14                | -0.10                                | 0                         | 0                                         | HZ2             | HE1                             |
| LYS58              | Heavy            | GLU3                               | 6.14                | -1.05                                | 1                         | -1                                        | O               | HB2                             |
| GLY103             | Heavy            | ASP7                               | 6.18                | -0.20                                | 0                         | -2                                        | HA3             | H                               |
| TYR59              | Heavy            | ARG5                               | 6.19                | -0.28                                | 0                         | 1                                         | HE1             | H                               |
| TYR59              | Heavy            | ALA2                               | 6.27                | -0.01                                | 0                         | 1                                         | HE1             | O                               |
| PRO108             | Heavy            | ARG5                               | 6.29                | -0.49                                | 0                         | 1                                         | HD3             | HA                              |
| ASP99              | Heavy            | HIS6                               | 6.29                | -0.26                                | -1                        | 0                                         | OD2             | HE2                             |
| LYS58              | Heavy            | PHE4                               | 6.32                | -0.20                                | 1                         | 0                                         | O               | HB3                             |
| ILE102             | Heavy            | ASP7                               | 6.38                | -0.07                                | 0                         | -2                                        | HG22            | H                               |

|        |       |      |      |        |    |    |      |     |
|--------|-------|------|------|--------|----|----|------|-----|
| GLY101 | Heavy | PHE4 | 6.43 | -0.02  | 0  | 0  | HA2  | HE1 |
| GLY107 | Heavy | ASP7 | 6.46 | 0.03   | 0  | -2 | HA3  | H   |
| TYR109 | Heavy | PHE4 | 6.62 | -0.11  | 0  | 0  | N    | HE1 |
| ALA104 | Heavy | ASP7 | 6.91 | -0.38  | 0  | -2 | H    | HB3 |
| GLY103 | Heavy | PHE4 | 6.93 | -0.03  | 0  | 0  | HA3  | HZ  |
| TRP47  | Heavy | ALA2 | 6.99 | -0.17  | 0  | 1  | HH2  | HB3 |
| ALA104 | Heavy | PHE4 | 7.12 | 0.05   | 0  | 0  | C    | HZ  |
| HIS35  | Heavy | PHE4 | 7.20 | -0.03  | 0  | 0  | HE1  | HD1 |
| ARG105 | Heavy | GLU3 | 7.24 | -0.75  | 1  | -1 | HH12 | O   |
| LYS57  | Heavy | GLU3 | 7.24 | -1.14  | 1  | -1 | HD2  | O   |
| TYR60  | Heavy | PHE4 | 7.25 | -0.08  | 0  | 0  | H    | HB3 |
| HIS35  | Heavy | HIS6 | 7.34 | 0.01   | 0  | 0  | HE1  | HE2 |
| LYS65  | Heavy | ALA2 | 7.35 | 1.46   | 1  | 1  | HZ1  | HA  |
| ARG100 | Heavy | HIS6 | 7.35 | 0.01   | 1  | 0  | C    | HE1 |
| LYS65  | Heavy | PHE4 | 7.38 | -0.24  | 1  | 0  | HZ3  | H   |
| VAL50  | Heavy | GLU3 | 7.39 | 0.02   | 0  | -1 | HG13 | HB3 |
| TRP52  | Heavy | GLU3 | 7.40 | 0.01   | 0  | -1 | HH2  | O   |
| ASP62  | Heavy | ALA2 | 7.45 | -1.37  | -1 | 1  | OD2  | HA  |
| ALA104 | Heavy | HIS6 | 7.66 | -0.04  | 0  | 0  | H    | ND1 |
| PHE53  | Heavy | PHE4 | 7.73 | -0.05  | 0  | 0  | HE2  | HZ  |
| ILE102 | Heavy | ARG5 | 7.87 | -0.02  | 0  | 1  | HG22 | O   |
| ASP1   | Light | ALA2 | 1.71 | -11.31 | 0  | 1  | OD2  | H   |
| TYR92  | Light | HIS6 | 1.96 | -5.15  | 0  | 0  | O    | H   |
| THR94  | Light | PHE4 | 2.08 | -6.29  | 0  | 0  | H    | O   |
| SER93  | Light | ARG5 | 2.23 | -4.42  | 0  | 1  | HA   | HA  |
| THR94  | Light | GLU3 | 2.32 | -1.87  | 0  | -1 | HG1  | H   |
| SER93  | Light | ALA2 | 2.39 | -1.55  | 0  | 1  | HB2  | HB2 |
| THR94  | Light | ALA2 | 2.42 | -0.76  | 0  | 1  | H    | HB3 |
| TYR92  | Light | ARG5 | 2.49 | -7.98  | 0  | 1  | O    | HA  |
| SER93  | Light | PHE4 | 2.66 | -3.67  | 0  | 0  | HA   | O   |
| SER91  | Light | HIS6 | 2.75 | -0.65  | 0  | 0  | O    | HE2 |
| TYR32  | Light | HIS6 | 2.79 | -4.80  | 0  | 0  | CD1  | HD2 |
| SER93  | Light | HIS6 | 3.70 | -1.54  | 0  | 0  | HA   | H   |
| THR94  | Light | ARG5 | 3.95 | -1.58  | 0  | 1  | H    | HA  |
| LEU96  | Light | PHE4 | 4.28 | -0.41  | 0  | 0  | HD22 | HD1 |
| TYR92  | Light | ASP7 | 4.52 | 0.31   | 0  | -2 | HH   | OXT |
| PRO95  | Light | ALA2 | 4.53 | -0.68  | 0  | 1  | N    | HB3 |
| TYR92  | Light | PHE4 | 4.60 | -1.58  | 0  | 0  | O    | HD1 |
| PRO95  | Light | GLU3 | 4.61 | -0.48  | 0  | -1 | HD2  | H   |
| ILE2   | Light | ALA2 | 4.85 | -0.37  | 0  | 1  | HD12 | HB1 |
| TYR32  | Light | ASP7 | 5.04 | -0.31  | 0  | -2 | HH   | O   |
| ASP1   | Light | GLU3 | 5.49 | -0.01  | 0  | -1 | OD1  | H   |
| SER93  | Light | GLU3 | 5.55 | 0.47   | 0  | -1 | HB2  | H   |
| LEU96  | Light | ARG5 | 5.69 | -0.09  | 0  | 1  | HD22 | HA  |
| ASP1   | Light | ARG5 | 5.74 | -0.38  | 0  | 1  | OD2  | HB2 |
| ILE29  | Light | HIS6 | 5.78 | -0.18  | 0  | 0  | O    | HD2 |
| GLN90  | Light | ALA2 | 5.83 | -0.04  | 0  | 1  | HE22 | HB1 |
| LEU96  | Light | ALA2 | 5.86 | -0.09  | 0  | 1  | HD21 | HB3 |

|       |       |      |      |       |   |    |      |      |
|-------|-------|------|------|-------|---|----|------|------|
| THR94 | Light | HIS6 | 5.90 | -0.06 | 0 | 0  | H    | H    |
| PRO95 | Light | PHE4 | 5.93 | -0.09 | 0 | 0  | N    | H    |
| ASN34 | Light | HIS6 | 5.99 | -0.03 | 0 | 0  | HD22 | HE2  |
| SER30 | Light | HIS6 | 5.99 | -0.10 | 0 | 0  | HB3  | HB3  |
| SER91 | Light | PHE4 | 6.03 | -0.10 | 0 | 0  | O    | HE1  |
| SER91 | Light | ARG5 | 6.10 | 0.22  | 0 | 1  | O    | HA   |
| LEU96 | Light | HIS6 | 6.15 | -0.12 | 0 | 0  | HD11 | HE2  |
| TYR92 | Light | ALA2 | 6.18 | -0.08 | 0 | 1  | O    | HB2  |
| ASP1  | Light | PHE4 | 6.35 | -0.05 | 0 | 0  | OD2  | O    |
| SER30 | Light | ASP7 | 6.45 | -0.11 | 0 | -2 | HB2  | OXT  |
| GLN90 | Light | HIS6 | 6.48 | -0.15 | 0 | 0  | OE1  | HD2  |
| ILE2  | Light | ARG5 | 6.55 | -0.06 | 0 | 1  | HD11 | HB3  |
| GLN90 | Light | PHE4 | 6.67 | -0.06 | 0 | 0  | HE22 | O    |
| TYR32 | Light | ARG5 | 6.74 | -0.31 | 0 | 1  | HE2  | HH12 |
| GLN90 | Light | ARG5 | 6.94 | -0.10 | 0 | 1  | OE1  | HA   |
| SER31 | Light | HIS6 | 6.99 | -0.11 | 0 | 0  | H    | HD2  |
| ILE2  | Light | PHE4 | 7.07 | -0.03 | 0 | 0  | HD13 | O    |
| SER30 | Light | ARG5 | 7.11 | -0.01 | 0 | 1  | HB2  | HH12 |
| LEU33 | Light | HIS6 | 7.30 | -0.07 | 0 | 0  | N    | HD2  |
| ALA50 | Light | HIS6 | 7.30 | -0.02 | 0 | 0  | HB2  | HE2  |
| ILE2  | Light | HIS6 | 7.34 | -0.06 | 0 | 0  | HD13 | H    |
| SER93 | Light | ASP7 | 7.34 | -0.03 | 0 | -2 | HB3  | N    |
| ILE29 | Light | ARG5 | 7.39 | -0.07 | 0 | 1  | HA   | HB3  |
| LEU96 | Light | GLU3 | 7.50 | -0.06 | 0 | -1 | HD21 | H    |
| TYR32 | Light | PHE4 | 7.59 | -0.05 | 0 | 0  | HE1  | HE1  |
| SER28 | Light | ARG5 | 7.82 | -0.20 | 0 | 1  | O    | HH12 |

**Table S15** – Quantum biochemistry details of RC MD2-#3

| Adu Residue | Adu Chain | A $\beta$ Residue | Distance (Å) | Interaction Energy (kcal/mol) | Adu Residue Charge | A $\beta$ Residue Charge | Adu Atom | A $\beta$ Atom |
|-------------|-----------|-------------------|--------------|-------------------------------|--------------------|--------------------------|----------|----------------|
| LYS65       | Heavy     | GLU3              | 1.59         | -12.01                        | 1                  | -1                       | HZ3      | OE2            |
| PRO108      | Heavy     | HIS6              | 1.64         | -5.31                         | 0                  | 0                        | O        | HE2            |
| ARG105      | Heavy     | ARG5              | 1.73         | -2.63                         | 1                  | 1                        | HH11     | O              |
| ILE102      | Heavy     | HIS6              | 2.15         | -0.64                         | 0                  | 0                        | HG21     | HE1            |
| TYR59       | Heavy     | ALA2              | 2.44         | -0.68                         | 0                  | 1                        | HE1      | O              |
| GLY107      | Heavy     | HIS6              | 2.45         | -2.51                         | 0                  | 0                        | O        | HE1            |
| TYR59       | Heavy     | PHE4              | 2.60         | -4.26                         | 0                  | 0                        | CZ       | HB3            |
| ARG105      | Heavy     | HIS6              | 2.73         | -3.82                         | 1                  | 0                        | HH11     | HA             |
| ARG105      | Heavy     | PHE4              | 2.83         | -3.14                         | 1                  | 0                        | HD2      | HE2            |
| GLY107      | Heavy     | PHE4              | 2.90         | -1.39                         | 0                  | 0                        | HA3      | HE1            |
| ARG105      | Heavy     | ASP7              | 2.94         | -5.25                         | 1                  | -2                       | HH12     | H              |
| PRO108      | Heavy     | PHE4              | 3.02         | -1.59                         | 0                  | 0                        | HD3      | HE1            |
| TYR59       | Heavy     | GLU3              | 3.14         | -2.22                         | 0                  | -1                       | HD1      | HA             |
| TRP52       | Heavy     | PHE4              | 3.38         | -2.69                         | 0                  | 0                        | HZ2      | HE2            |
| TYR60       | Heavy     | GLU3              | 3.47         | 3.47                          | 0                  | -1                       | O        | OE2            |
| TYR109      | Heavy     | HIS6              | 3.49         | -3.45                         | 0                  | 0                        | HA       | HE2            |

|        |       |      |      |        |    |    |      |     |
|--------|-------|------|------|--------|----|----|------|-----|
| LYS57  | Heavy | PHE4 | 3.62 | -0.60  | 1  | 0  | HD3  | HD2 |
| ARG106 | Heavy | HIS6 | 4.09 | -0.69  | 1  | 0  | C    | HE1 |
| GLY103 | Heavy | HIS6 | 4.09 | -0.41  | 0  | 0  | HA3  | HE1 |
| ASP62  | Heavy | GLU3 | 4.12 | 2.06   | -1 | -1 | OD1  | OE2 |
| THR61  | Heavy | GLU3 | 4.57 | 0.64   | 0  | -1 | HA   | OE2 |
| GLY101 | Heavy | HIS6 | 4.61 | -0.05  | 0  | 0  | HA2  | HE2 |
| ALA104 | Heavy | ASP7 | 5.08 | -0.39  | 0  | -2 | H    | OD1 |
| ARG106 | Heavy | PHE4 | 5.13 | 0.03   | 1  | 0  | H    | HZ  |
| GLY103 | Heavy | ASP7 | 5.14 | -0.62  | 0  | -2 | HA2  | OD1 |
| TRP47  | Heavy | GLU3 | 5.18 | -0.14  | 0  | -1 | HH2  | OE1 |
| ILE102 | Heavy | PHE4 | 5.28 | -0.17  | 0  | 0  | O    | HZ  |
| GLY103 | Heavy | PHE4 | 5.56 | -0.05  | 0  | 0  | HA3  | HZ  |
| LYS65  | Heavy | ALA2 | 5.78 | 1.46   | 1  | 1  | HE3  | HA  |
| ILE102 | Heavy | ASP7 | 5.91 | -0.13  | 0  | -2 | HG22 | H   |
| LYS58  | Heavy | GLU3 | 5.99 | -0.90  | 1  | -1 | O    | HA  |
| TRP52  | Heavy | HIS6 | 6.03 | -0.17  | 0  | 0  | HH2  | HE1 |
| LYS58  | Heavy | ALA2 | 6.07 | 0.65   | 1  | 1  | O    | O   |
| ASP99  | Heavy | HIS6 | 6.12 | -0.27  | -1 | 0  | OD1  | HE2 |
| VAL50  | Heavy | PHE4 | 6.15 | -0.10  | 0  | 0  | HG11 | HB2 |
| ARG105 | Heavy | GLU3 | 6.17 | -0.85  | 1  | -1 | HH21 | O   |
| LYS58  | Heavy | PHE4 | 6.27 | -0.15  | 1  | 0  | O    | HB3 |
| TRP52  | Heavy | ARG5 | 6.28 | -0.08  | 0  | 1  | HH2  | H   |
| TYR59  | Heavy | ARG5 | 6.30 | -0.20  | 0  | 1  | OH   | H   |
| PRO108 | Heavy | ARG5 | 6.36 | -0.36  | 0  | 1  | HD3  | HA  |
| TYR110 | Heavy | HIS6 | 6.40 | -0.13  | 0  | 0  | N    | HE2 |
| GLY107 | Heavy | ARG5 | 6.41 | -0.13  | 0  | 1  | HA3  | C   |
| GLY107 | Heavy | ASP7 | 6.44 | 0.05   | 0  | -2 | H    | H   |
| LYS57  | Heavy | ALA2 | 6.58 | 0.95   | 1  | 1  | HB2  | O   |
| ALA104 | Heavy | HIS6 | 6.59 | -0.07  | 0  | 0  | N    | HE1 |
| TRP47  | Heavy | PHE4 | 6.63 | -0.08  | 0  | 0  | HH2  | HB2 |
| TYR60  | Heavy | PHE4 | 6.82 | -0.02  | 0  | 0  | H    | H   |
| VAL50  | Heavy | GLU3 | 6.99 | 0.02   | 0  | -1 | HG12 | OE1 |
| TYR109 | Heavy | PHE4 | 7.06 | -0.09  | 0  | 0  | N    | HE1 |
| ARG106 | Heavy | ASP7 | 7.10 | -1.39  | 1  | -2 | H    | H   |
| LYS65  | Heavy | PHE4 | 7.14 | -0.22  | 1  | 0  | HZ3  | H   |
| LYS57  | Heavy | ARG5 | 7.19 | 0.62   | 1  | 1  | HD3  | H   |
| ALA104 | Heavy | PHE4 | 7.24 | 0.05   | 0  | 0  | C    | HZ  |
| HIS35  | Heavy | HIS6 | 7.28 | -0.01  | 0  | 0  | HE1  | HE2 |
| GLY101 | Heavy | PHE4 | 7.40 | -0.02  | 0  | 0  | HA2  | HE1 |
| LYS57  | Heavy | GLU3 | 7.41 | -0.97  | 1  | -1 | HB2  | HA  |
| TYR60  | Heavy | ALA2 | 7.43 | -0.25  | 0  | 1  | H    | C   |
| ARG100 | Heavy | HIS6 | 7.52 | 0.03   | 1  | 0  | C    | HE1 |
| HIS35  | Heavy | PHE4 | 7.59 | -0.02  | 0  | 0  | HE1  | HD1 |
| ARG105 | Heavy | ALA2 | 7.73 | 0.76   | 1  | 1  | HH21 | O   |
| VAL48  | Heavy | GLU3 | 7.86 | 0.12   | 0  | -1 | O    | OE1 |
| TRP52  | Heavy | GLU3 | 7.91 | -0.03  | 0  | -1 | HH2  | C   |
| SER63  | Heavy | GLU3 | 7.98 | 0.03   | 0  | -1 | H    | OE2 |
| THR94  | Light | GLU3 | 1.65 | -11.79 | 0  | -1 | HG1  | OE1 |



|       |       |      |      |       |   |    |      |      |
|-------|-------|------|------|-------|---|----|------|------|
| TYR92 | Light | HIS6 | 1.97 | -7.00 | 0 | 0  | O    | H    |
| THR94 | Light | PHE4 | 2.01 | -6.89 | 0 | 0  | OG1  | H    |
| SER93 | Light | ARG5 | 2.01 | -4.61 | 0 | 1  | HB3  | HG3  |
| TYR92 | Light | ASP7 | 2.30 | -2.43 | 0 | -2 | HH   | OXT  |
| TYR92 | Light | ARG5 | 2.39 | -8.32 | 0 | 1  | HE2  | HG3  |
| GLN27 | Light | ARG5 | 2.41 | -1.55 | 0 | 1  | OE1  | HH11 |
| SER93 | Light | PHE4 | 2.51 | -3.07 | 0 | 0  | HA   | O    |
| TYR32 | Light | HIS6 | 2.62 | -4.06 | 0 | 0  | HE1  | HB2  |
| SER91 | Light | HIS6 | 2.77 | -0.74 | 0 | 0  | O    | HD2  |
| PRO95 | Light | GLU3 | 2.81 | -1.74 | 0 | -1 | HD2  | HG3  |
| SER93 | Light | HIS6 | 3.39 | -2.47 | 0 | 0  | HB3  | H    |
| THR94 | Light | ARG5 | 3.65 | -1.91 | 0 | 1  | H    | HA   |
| TYR92 | Light | PHE4 | 3.67 | -1.95 | 0 | 0  | O    | HE1  |
| TYR32 | Light | ASP7 | 3.98 | -0.68 | 0 | -2 | HE1  | H    |
| SER30 | Light | ASP7 | 4.01 | -0.41 | 0 | -2 | HB2  | O    |
| ILE2  | Light | ARG5 | 4.07 | -0.15 | 0 | 1  | HD12 | HH12 |
| SER30 | Light | HIS6 | 4.23 | -0.34 | 0 | 0  | HB3  | HB3  |
| LEU96 | Light | PHE4 | 4.49 | -0.27 | 0 | 0  | HD22 | HD1  |
| SER93 | Light | GLU3 | 4.82 | -0.36 | 0 | -1 | HB2  | HB2  |
| SER91 | Light | PHE4 | 4.86 | -0.27 | 0 | 0  | O    | HE1  |
| THR94 | Light | HIS6 | 5.42 | -0.16 | 0 | 0  | H    | H    |
| LEU96 | Light | HIS6 | 5.51 | -0.11 | 0 | 0  | HD22 | HD2  |
| PRO95 | Light | PHE4 | 5.59 | -0.04 | 0 | 0  | N    | H    |
| THR94 | Light | ALA2 | 5.67 | -0.26 | 0 | 1  | HG1  | C    |
| SER28 | Light | ARG5 | 5.80 | -0.37 | 0 | 1  | O    | HH11 |
| TYR32 | Light | PHE4 | 5.89 | -0.10 | 0 | 0  | HD1  | HE1  |
| SER31 | Light | HIS6 | 5.90 | -0.12 | 0 | 0  | H    | HB3  |
| LEU96 | Light | ARG5 | 5.91 | -0.09 | 0 | 1  | HD22 | HA   |
| ILE29 | Light | HIS6 | 6.00 | -0.16 | 0 | 0  | O    | HB3  |
| SER91 | Light | ARG5 | 6.21 | 0.16  | 0 | 1  | O    | HA   |
| SER31 | Light | ASP7 | 6.34 | -0.26 | 0 | -2 | H    | O    |
| ILE29 | Light | ARG5 | 6.38 | -0.06 | 0 | 1  | HA   | HG3  |
| GLN90 | Light | HIS6 | 6.38 | -0.14 | 0 | 0  | OE1  | HD2  |
| LEU96 | Light | GLU3 | 6.50 | -0.02 | 0 | -1 | H    | OE1  |
| ASP1  | Light | GLU3 | 6.57 | 0.24  | 0 | -1 | OD2  | HG3  |
| LEU33 | Light | HIS6 | 6.70 | -0.13 | 0 | 0  | N    | HD2  |
| TYR32 | Light | ARG5 | 6.74 | -0.08 | 0 | 1  | HD1  | C    |
| GLN90 | Light | PHE4 | 6.92 | -0.06 | 0 | 0  | HE22 | O    |
| GLN90 | Light | ARG5 | 6.99 | -0.07 | 0 | 1  | OE1  | HA   |
| SER30 | Light | ARG5 | 7.05 | -0.05 | 0 | 1  | HB2  | HG2  |
| ASN34 | Light | HIS6 | 7.14 | -0.03 | 0 | 0  | HD22 | HE2  |
| ILE2  | Light | PHE4 | 7.16 | -0.03 | 0 | 0  | HD13 | O    |
| SER93 | Light | ASP7 | 7.29 | 0.17  | 0 | -2 | HB3  | N    |
| ILE2  | Light | HIS6 | 7.37 | -0.04 | 0 | 0  | HD13 | H    |
| ILE29 | Light | ASP7 | 7.45 | -0.21 | 0 | -2 | C    | O    |
| SER28 | Light | ASP7 | 7.58 | 0.19  | 0 | -2 | OG   | O    |
| PRO95 | Light | ALA2 | 7.70 | -0.21 | 0 | 1  | HD2  | C    |
| ASP1  | Light | ARG5 | 7.71 | 0.11  | 0 | 1  | HA   | HH12 |

|       |       |      |      |       |   |    |      |      |
|-------|-------|------|------|-------|---|----|------|------|
| GLN90 | Light | GLU3 | 7.84 | -0.01 | 0 | -1 | HE22 | HB2  |
| PRO95 | Light | ARG5 | 7.91 | -0.18 | 0 | 1  | N    | HA   |
| TYR92 | Light | GLU3 | 7.92 | 0.00  | 0 | -1 | O    | C    |
| SER28 | Light | HIS6 | 7.94 | -0.01 | 0 | 0  | O    | H    |
| SER26 | Light | ARG5 | 7.96 | 0.10  | 0 | 1  | HG   | HH11 |

**Table S16** – Quantum biochemistry details of RC MD2-#4

| <b>Adu Residue</b> | <b>Adu Chain</b> | <b>A<math>\beta</math> Residue</b> | <b>Distance (Å)</b> | <b>Interaction Energy (kcal/mol)</b> | <b>Adu Residue Charge</b> | <b>A<math>\beta</math> Residue Charge</b> | <b>Adu Atom</b> | <b>A<math>\beta</math> Atom</b> |
|--------------------|------------------|------------------------------------|---------------------|--------------------------------------|---------------------------|-------------------------------------------|-----------------|---------------------------------|
| LYS65              | Heavy            | GLU3                               | 1.55                | -10.95                               | 1                         | -1                                        | HZ1             | OE1                             |
| PRO108             | Heavy            | HIS6                               | 1.65                | -5.56                                | 0                         | 0                                         | O               | HE2                             |
| GLY107             | Heavy            | HIS6                               | 1.82                | -0.49                                | 0                         | 0                                         | HA3             | HE1                             |
| PRO108             | Heavy            | PHE4                               | 2.38                | -1.44                                | 0                         | 0                                         | HD3             | HE1                             |
| ARG105             | Heavy            | PHE4                               | 2.46                | -2.07                                | 1                         | 0                                         | HD2             | HE2                             |
| TYR59              | Heavy            | GLU3                               | 2.54                | -3.45                                | 0                         | -1                                        | HE1             | HB2                             |
| TRP52              | Heavy            | PHE4                               | 2.70                | -3.56                                | 0                         | 0                                         | HZ2             | HE2                             |
| GLY107             | Heavy            | PHE4                               | 2.74                | -0.96                                | 0                         | 0                                         | HA3             | HZ                              |
| ILE102             | Heavy            | HIS6                               | 2.74                | -2.27                                | 0                         | 0                                         | HG22            | HE1                             |
| TYR59              | Heavy            | PHE4                               | 2.83                | -4.40                                | 0                         | 0                                         | CZ              | HB3                             |
| ARG105             | Heavy            | HIS6                               | 3.11                | -1.47                                | 1                         | 0                                         | HH11            | O                               |
| TYR109             | Heavy            | HIS6                               | 3.79                | -2.23                                | 0                         | 0                                         | HA              | HE2                             |
| TYR60              | Heavy            | GLU3                               | 3.82                | 0.52                                 | 0                         | -1                                        | O               | OE1                             |
| ARG105             | Heavy            | ASP7                               | 3.84                | -2.77                                | 1                         | -2                                        | HH11            | O                               |
| ARG105             | Heavy            | ARG5                               | 4.04                | 0.85                                 | 1                         | 1                                         | HH21            | O                               |
| ARG106             | Heavy            | HIS6                               | 4.48                | 0.19                                 | 1                         | 0                                         | C               | HE1                             |
| GLY101             | Heavy            | HIS6                               | 5.23                | -0.06                                | 0                         | 0                                         | HA2             | HE2                             |
| LYS57              | Heavy            | PHE4                               | 5.36                | -0.29                                | 1                         | 0                                         | HG3             | HE2                             |
| VAL50              | Heavy            | PHE4                               | 5.43                | -0.18                                | 0                         | 0                                         | HG11            | HB2                             |
| ARG106             | Heavy            | PHE4                               | 5.52                | 0.09                                 | 1                         | 0                                         | C               | HZ                              |
| ILE102             | Heavy            | PHE4                               | 5.65                | -0.11                                | 0                         | 0                                         | HG22            | HE1                             |
| TRP52              | Heavy            | HIS6                               | 5.81                | -0.18                                | 0                         | 0                                         | HH2             | HE1                             |
| THR61              | Heavy            | GLU3                               | 5.84                | 0.29                                 | 0                         | -1                                        | HA              | OE1                             |
| PRO108             | Heavy            | ARG5                               | 5.98                | -0.40                                | 0                         | 1                                         | HD3             | HA                              |
| ASP62              | Heavy            | GLU3                               | 6.00                | 1.46                                 | -1                        | -1                                        | OD2             | OE1                             |
| TRP52              | Heavy            | ARG5                               | 6.11                | -0.14                                | 0                         | 1                                         | HH2             | N                               |
| TRP47              | Heavy            | GLU3                               | 6.15                | -0.03                                | 0                         | -1                                        | HH2             | OE1                             |
| LYS58              | Heavy            | GLU3                               | 6.18                | -1.04                                | 1                         | -1                                        | O               | HB2                             |
| ASP99              | Heavy            | HIS6                               | 6.21                | -0.18                                | -1                        | 0                                         | OD2             | HE2                             |
| TYR59              | Heavy            | ARG5                               | 6.47                | -0.19                                | 0                         | 1                                         | OH              | H                               |
| LYS65              | Heavy            | ALA2                               | 6.54                | 1.65                                 | 1                         | 1                                         | HZ1             | HA                              |
| TRP47              | Heavy            | PHE4                               | 6.56                | -0.08                                | 0                         | 0                                         | HH2             | HB2                             |
| TYR110             | Heavy            | HIS6                               | 6.66                | -0.11                                | 0                         | 0                                         | N               | HE2                             |
| TYR59              | Heavy            | ALA2                               | 6.67                | -0.03                                | 0                         | 1                                         | HE1             | C                               |
| HIS35              | Heavy            | HIS6                               | 6.68                | -0.02                                | 0                         | 0                                         | HE1             | HE2                             |
| GLY107             | Heavy            | ARG5                               | 6.71                | -0.10                                | 0                         | 1                                         | HA3             | O                               |
| LYS58              | Heavy            | PHE4                               | 6.72                | -0.14                                | 1                         | 0                                         | O               | HB3                             |

|        |       |      |      |       |    |    |      |      |
|--------|-------|------|------|-------|----|----|------|------|
| TYR109 | Heavy | PHE4 | 7.00 | -0.08 | 0  | 0  | N    | HE1  |
| GLY103 | Heavy | HIS6 | 7.01 | -0.10 | 0  | 0  | N    | HE1  |
| TRP52  | Heavy | GLU3 | 7.07 | -0.04 | 0  | -1 | HH2  | C    |
| HIS35  | Heavy | PHE4 | 7.20 | -0.03 | 0  | 0  | HE1  | HD1  |
| LYS65  | Heavy | PHE4 | 7.21 | -0.16 | 1  | 0  | HZ1  | H    |
| TYR60  | Heavy | PHE4 | 7.31 | -0.06 | 0  | 0  | H    | H    |
| LYS57  | Heavy | GLU3 | 7.34 | -1.16 | 1  | -1 | HD2  | O    |
| ASP62  | Heavy | ALA2 | 7.39 | -1.32 | -1 | 1  | OD2  | HA   |
| GLY101 | Heavy | PHE4 | 7.44 | 0.00  | 0  | 0  | HA2  | HE1  |
| VAL50  | Heavy | GLU3 | 7.56 | 0.03  | 0  | -1 | HG12 | HB3  |
| ARG105 | Heavy | GLU3 | 7.67 | -0.69 | 1  | -1 | HH21 | O    |
| ILE102 | Heavy | ASP7 | 7.87 | -0.03 | 0  | -2 | HG21 | N    |
| TYR60  | Heavy | ALA2 | 7.90 | -0.25 | 0  | 1  | O    | HA   |
| ILE102 | Heavy | ARG5 | 7.90 | -0.04 | 0  | 1  | HG21 | C    |
| TRP47  | Heavy | ALA2 | 7.92 | -0.14 | 0  | 1  | HH2  | HB3  |
| VAL50  | Heavy | HIS6 | 7.92 | -0.01 | 0  | 0  | HG22 | HE2  |
| PHE53  | Heavy | PHE4 | 7.98 | -0.07 | 0  | 0  | HE1  | HZ   |
| ASP1   | Light | ALA2 | 1.69 | -9.00 | 0  | 1  | OD1  | H3   |
| THR94  | Light | PHE4 | 1.88 | -5.34 | 0  | 0  | OG1  | H    |
| SER93  | Light | ARG5 | 2.18 | -4.03 | 0  | 1  | HB2  | HB2  |
| TYR92  | Light | ASP7 | 2.27 | -5.28 | 0  | -2 | HH   | OD1  |
| THR94  | Light | GLU3 | 2.29 | -2.97 | 0  | -1 | HG1  | H    |
| TYR92  | Light | HIS6 | 2.41 | -6.09 | 0  | 0  | O    | H    |
| TYR92  | Light | ARG5 | 2.51 | -8.01 | 0  | 1  | OH   | HD2  |
| SER93  | Light | PHE4 | 2.54 | -5.44 | 0  | 0  | HA   | O    |
| THR94  | Light | ALA2 | 2.60 | -1.28 | 0  | 1  | HG1  | HB3  |
| SER93  | Light | ALA2 | 2.81 | -1.50 | 0  | 1  | HB2  | HB2  |
| TYR32  | Light | HIS6 | 3.01 | -4.68 | 0  | 0  | HE2  | HB3  |
| SER91  | Light | HIS6 | 3.26 | -0.46 | 0  | 0  | O    | HD2  |
| SER93  | Light | HIS6 | 3.72 | -0.87 | 0  | 0  | HB3  | H    |
| THR94  | Light | ARG5 | 3.73 | -1.49 | 0  | 1  | H    | HA   |
| ASP1   | Light | ARG5 | 3.99 | -0.94 | 0  | 1  | OD2  | HD3  |
| LEU96  | Light | PHE4 | 4.16 | -0.38 | 0  | 0  | HD21 | HD1  |
| PRO95  | Light | ALA2 | 4.28 | -0.52 | 0  | 1  | HD2  | HA   |
| TYR92  | Light | PHE4 | 4.37 | -1.79 | 0  | 0  | O    | O    |
| PRO95  | Light | GLU3 | 4.53 | -0.70 | 0  | -1 | HD2  | H    |
| ILE2   | Light | ALA2 | 5.12 | -0.41 | 0  | 1  | H    | HB1  |
| SER93  | Light | ASP7 | 5.35 | -0.22 | 0  | -2 | HB3  | H    |
| LEU96  | Light | ARG5 | 5.37 | -0.12 | 0  | 1  | HD21 | HA   |
| ASP1   | Light | GLU3 | 5.44 | 0.29  | 0  | -1 | OD1  | H    |
| SER30  | Light | ASP7 | 5.49 | 0.00  | 0  | -2 | HG   | OD1  |
| SER91  | Light | PHE4 | 5.50 | -0.15 | 0  | 0  | O    | HE1  |
| TYR32  | Light | ASP7 | 5.52 | -0.24 | 0  | -2 | HE2  | OD2  |
| ILE2   | Light | ARG5 | 5.66 | -0.12 | 0  | 1  | HD13 | HD2  |
| GLN27  | Light | ARG5 | 5.75 | 0.05  | 0  | 1  | HG2  | HH22 |
| SER91  | Light | ARG5 | 5.76 | 0.02  | 0  | 1  | O    | HA   |
| SER93  | Light | GLU3 | 5.81 | 0.52  | 0  | -1 | HB2  | H    |
| GLN90  | Light | ALA2 | 5.92 | -0.03 | 0  | 1  | HE22 | HB1  |

|       |       |      |      |       |   |    |      |     |
|-------|-------|------|------|-------|---|----|------|-----|
| PRO95 | Light | PHE4 | 5.93 | -0.15 | 0 | 0  | N    | H   |
| LEU96 | Light | HIS6 | 5.94 | -0.12 | 0 | 0  | HD21 | HE2 |
| THR94 | Light | HIS6 | 5.96 | -0.12 | 0 | 0  | H    | H   |
| ASP1  | Light | PHE4 | 6.01 | -0.08 | 0 | 0  | OD2  | O   |
| SER30 | Light | HIS6 | 6.11 | -0.09 | 0 | 0  | HB2  | HB3 |
| SER28 | Light | ARG5 | 6.13 | -0.26 | 0 | 1  | O    | HD2 |
| ILE29 | Light | HIS6 | 6.21 | -0.15 | 0 | 0  | O    | HD2 |
| TYR92 | Light | ALA2 | 6.33 | -0.20 | 0 | 1  | O    | HB2 |
| SER28 | Light | ASP7 | 6.44 | 0.20  | 0 | -2 | HG   | OD1 |
| LEU96 | Light | ALA2 | 6.50 | -0.08 | 0 | 1  | HD23 | HB3 |
| GLN90 | Light | PHE4 | 6.55 | -0.06 | 0 | 0  | HE22 | O   |
| ILE29 | Light | ARG5 | 6.81 | -0.10 | 0 | 1  | HG22 | HB3 |
| GLN90 | Light | ARG5 | 6.89 | -0.11 | 0 | 1  | OE1  | HA  |
| TYR32 | Light | ARG5 | 6.94 | -0.25 | 0 | 1  | HD2  | HB3 |
| GLN90 | Light | HIS6 | 6.96 | -0.12 | 0 | 0  | OE1  | HD2 |
| ILE29 | Light | ASP7 | 7.02 | -0.05 | 0 | -2 | HA   | OD1 |
| ILE2  | Light | PHE4 | 7.04 | -0.03 | 0 | 0  | HG12 | O   |
| ASN34 | Light | HIS6 | 7.23 | -0.02 | 0 | 0  | HD22 | HE2 |
| SER31 | Light | HIS6 | 7.34 | -0.08 | 0 | 0  | H    | HD2 |
| TYR32 | Light | PHE4 | 7.59 | -0.06 | 0 | 0  | HE1  | HE1 |
| LEU33 | Light | HIS6 | 7.59 | -0.05 | 0 | 0  | N    | HD2 |
| SER28 | Light | HIS6 | 7.63 | -0.05 | 0 | 0  | O    | H   |
| ILE2  | Light | HIS6 | 7.73 | -0.03 | 0 | 0  | HG13 | H   |
| PRO95 | Light | ARG5 | 7.83 | -0.16 | 0 | 1  | N    | HB2 |
| THR97 | Light | ALA2 | 7.88 | -0.06 | 0 | 1  | H    | HB1 |
| THR94 | Light | ASP7 | 7.97 | 0.22  | 0 | -2 | H    | H   |

**Table S17** – Quantum biochemistry details of RC MD2-#5

| Adu Residue | Adu Chain | A $\beta$ Residue | Distance (Å) | Interaction Energy (kcal/mol) | Adu Residue Charge | A $\beta$ Residue Charge | Adu Atom | A $\beta$ Atom |
|-------------|-----------|-------------------|--------------|-------------------------------|--------------------|--------------------------|----------|----------------|
| LYS65       | Heavy     | GLU3              | 1.63         | -10.71                        | 1                  | -1                       | HZ3      | OE1            |
| ARG105      | Heavy     | ASP7              | 1.78         | -16.00                        | 1                  | -2                       | HH12     | OD2            |
| PRO108      | Heavy     | HIS6              | 2.06         | -4.61                         | 0                  | 0                        | O        | HE2            |
| TYR59       | Heavy     | PHE4              | 2.38         | -4.28                         | 0                  | 0                        | CE2      | HB3            |
| GLY107      | Heavy     | HIS6              | 2.40         | -2.64                         | 0                  | 0                        | O        | HE1            |
| ILE102      | Heavy     | HIS6              | 2.42         | 0.06                          | 0                  | 0                        | O        | HE1            |
| TYR59       | Heavy     | ALA2              | 2.66         | -0.50                         | 0                  | 1                        | HE1      | O              |
| ARG105      | Heavy     | PHE4              | 2.76         | -1.57                         | 1                  | 0                        | HH21     | HD2            |
| GLY107      | Heavy     | PHE4              | 2.83         | -1.58                         | 0                  | 0                        | HA3      | CZ             |
| PRO108      | Heavy     | PHE4              | 2.85         | -2.18                         | 0                  | 0                        | HD3      | CD1            |
| TRP52       | Heavy     | PHE4              | 2.90         | -3.52                         | 0                  | 0                        | HH2      | HB3            |
| ARG105      | Heavy     | ARG5              | 2.97         | 0.87                          | 1                  | 1                        | HH12     | O              |
| TYR59       | Heavy     | GLU3              | 3.04         | -2.76                         | 0                  | -1                       | HD1      | HA             |
| TYR109      | Heavy     | HIS6              | 3.22         | -2.12                         | 0                  | 0                        | HA       | HE2            |
| ALA104      | Heavy     | ASP7              | 3.55         | -0.96                         | 0                  | -2                       | HB2      | OD1            |
| ARG105      | Heavy     | HIS6              | 3.99         | -0.22                         | 1                  | 0                        | HH12     | HA             |

|        |       |      |      |        |    |    |      |     |
|--------|-------|------|------|--------|----|----|------|-----|
| ASP62  | Heavy | GLU3 | 4.02 | 2.38   | -1 | -1 | OD1  | OE1 |
| GLY103 | Heavy | HIS6 | 4.08 | -0.04  | 0  | 0  | HA3  | ND1 |
| TYR60  | Heavy | GLU3 | 4.19 | 1.84   | 0  | -1 | O    | OE1 |
| ARG106 | Heavy | HIS6 | 4.25 | -0.37  | 1  | 0  | C    | HE1 |
| TRP47  | Heavy | GLU3 | 4.27 | -0.16  | 0  | -1 | HH2  | OE2 |
| GLY101 | Heavy | HIS6 | 4.46 | 0.14   | 0  | 0  | HA2  | HE1 |
| ILE102 | Heavy | PHE4 | 4.66 | -0.28  | 0  | 0  | O    | HZ  |
| THR61  | Heavy | GLU3 | 4.92 | 0.04   | 0  | -1 | HA   | OE2 |
| GLY103 | Heavy | ASP7 | 4.98 | -0.45  | 0  | -2 | HA3  | H   |
| VAL50  | Heavy | PHE4 | 5.17 | -0.19  | 0  | 0  | HG12 | HB2 |
| ARG106 | Heavy | PHE4 | 5.29 | 0.09   | 1  | 0  | H    | HZ  |
| GLY103 | Heavy | PHE4 | 5.45 | -0.06  | 0  | 0  | HA3  | HZ  |
| TYR59  | Heavy | ARG5 | 5.55 | -0.23  | 0  | 1  | HH   | H   |
| ARG105 | Heavy | GLU3 | 5.60 | -0.99  | 1  | -1 | HH11 | O   |
| TRP52  | Heavy | HIS6 | 5.72 | -0.16  | 0  | 0  | HZ2  | HE1 |
| TRP52  | Heavy | ARG5 | 5.85 | -0.11  | 0  | 1  | HH2  | H   |
| TRP47  | Heavy | PHE4 | 5.95 | -0.12  | 0  | 0  | HH2  | HB2 |
| LYS57  | Heavy | PHE4 | 5.98 | -0.11  | 1  | 0  | HB2  | HD2 |
| ALA104 | Heavy | HIS6 | 6.08 | -0.17  | 0  | 0  | H    | ND1 |
| LYS65  | Heavy | ALA2 | 6.10 | 1.36   | 1  | 1  | HE2  | HA  |
| TYR109 | Heavy | PHE4 | 6.14 | -0.07  | 0  | 0  | HA   | HE1 |
| ILE102 | Heavy | ASP7 | 6.17 | -0.04  | 0  | -2 | HG21 | H   |
| LYS58  | Heavy | PHE4 | 6.28 | -0.15  | 1  | 0  | C    | HB3 |
| TYR110 | Heavy | HIS6 | 6.32 | -0.16  | 0  | 0  | N    | HE2 |
| PRO108 | Heavy | ARG5 | 6.35 | -0.35  | 0  | 1  | HD3  | N   |
| GLY107 | Heavy | ARG5 | 6.39 | -0.13  | 0  | 1  | HA3  | C   |
| ASP99  | Heavy | HIS6 | 6.40 | -0.25  | -1 | 0  | OD2  | HE2 |
| TYR60  | Heavy | PHE4 | 6.46 | -0.08  | 0  | 0  | H    | H   |
| LYS65  | Heavy | PHE4 | 6.56 | -0.15  | 1  | 0  | HZ3  | H   |
| ARG105 | Heavy | ALA2 | 6.66 | 0.95   | 1  | 1  | HH21 | O   |
| ALA104 | Heavy | PHE4 | 6.66 | -0.01  | 0  | 0  | N    | HZ  |
| ARG106 | Heavy | ASP7 | 6.66 | -1.45  | 1  | -2 | H    | OD1 |
| GLY101 | Heavy | PHE4 | 6.72 | -0.03  | 0  | 0  | HA2  | HE1 |
| TRP52  | Heavy | GLU3 | 6.80 | -0.01  | 0  | -1 | HH2  | C   |
| LYS58  | Heavy | GLU3 | 6.81 | -1.03  | 1  | -1 | O    | HA  |
| VAL50  | Heavy | GLU3 | 6.92 | 0.01   | 0  | -1 | HG13 | OE2 |
| HIS35  | Heavy | PHE4 | 7.09 | -0.03  | 0  | 0  | HE1  | HD1 |
| GLY107 | Heavy | ASP7 | 7.24 | -0.08  | 0  | -2 | H    | H   |
| LYS58  | Heavy | ALA2 | 7.39 | 0.59   | 1  | 1  | O    | O   |
| ARG100 | Heavy | HIS6 | 7.43 | 0.02   | 1  | 0  | C    | HE1 |
| HIS35  | Heavy | HIS6 | 7.54 | 0.01   | 0  | 0  | HE2  | HE2 |
| ALA49  | Heavy | GLU3 | 7.63 | -0.09  | 0  | -1 | HA   | OE2 |
| LYS57  | Heavy | ALA2 | 7.74 | 0.87   | 1  | 1  | HD2  | O   |
| TYR60  | Heavy | ALA2 | 7.83 | -0.22  | 0  | 1  | H    | O   |
| ILE102 | Heavy | ARG5 | 7.86 | -0.10  | 0  | 1  | HG21 | C   |
| ASP62  | Heavy | ALA2 | 7.93 | -1.16  | -1 | 1  | OD1  | HA  |
| GLY103 | Heavy | ARG5 | 7.95 | 0.02   | 0  | 1  | HA3  | O   |
| THR94  | Light | GLU3 | 1.72 | -11.31 | 0  | -1 | HG1  | OE2 |

|       |       |      |      |       |   |    |      |     |
|-------|-------|------|------|-------|---|----|------|-----|
| THR94 | Light | PHE4 | 1.97 | -5.93 | 0 | 0  | OG1  | H   |
| TYR92 | Light | HIS6 | 2.12 | -6.52 | 0 | 0  | O    | H   |
| SER93 | Light | ARG5 | 2.37 | -4.57 | 0 | 1  | HB3  | HG3 |
| SER93 | Light | PHE4 | 2.39 | -1.74 | 0 | 0  | HB2  | O   |
| TYR92 | Light | ARG5 | 2.43 | -9.05 | 0 | 1  | OH   | HD2 |
| TYR32 | Light | HIS6 | 2.71 | -4.33 | 0 | 0  | HH   | HB2 |
| PRO95 | Light | GLU3 | 2.84 | -0.73 | 0 | -1 | HD2  | HG3 |
| SER91 | Light | HIS6 | 2.86 | -0.56 | 0 | 0  | O    | HD2 |
| TYR92 | Light | PHE4 | 3.46 | -2.10 | 0 | 0  | O    | HE1 |
| LEU96 | Light | PHE4 | 3.64 | -0.50 | 0 | 0  | HD21 | HD1 |
| SER93 | Light | HIS6 | 3.74 | -1.75 | 0 | 0  | HA   | H   |
| THR94 | Light | ARG5 | 3.90 | -1.62 | 0 | 1  | H    | HA  |
| TYR32 | Light | ASP7 | 4.06 | -0.24 | 0 | -2 | HH   | O   |
| SER93 | Light | GLU3 | 4.31 | -0.46 | 0 | -1 | HB2  | HB2 |
| TYR92 | Light | ASP7 | 4.34 | 0.11  | 0 | -2 | HE1  | N   |
| ASP1  | Light | GLU3 | 4.65 | -0.02 | 0 | -1 | OD1  | HG3 |
| SER91 | Light | PHE4 | 4.80 | -0.26 | 0 | 0  | O    | HE1 |
| ILE2  | Light | ARG5 | 5.13 | -0.08 | 0 | 1  | HD11 | HG3 |
| PRO95 | Light | PHE4 | 5.48 | 0.03  | 0 | 0  | N    | H   |
| SER30 | Light | HIS6 | 5.49 | -0.13 | 0 | 0  | HB3  | HB3 |
| THR94 | Light | HIS6 | 5.72 | -0.09 | 0 | 0  | H    | H   |
| TYR32 | Light | ARG5 | 5.82 | -0.34 | 0 | 1  | HE2  | HG2 |
| THR94 | Light | ALA2 | 5.88 | -0.79 | 0 | 1  | HG1  | C   |
| LEU96 | Light | HIS6 | 5.99 | -0.10 | 0 | 0  | HD22 | HD2 |
| LEU96 | Light | ARG5 | 6.09 | -0.07 | 0 | 1  | HD21 | HA  |
| LEU96 | Light | GLU3 | 6.27 | -0.12 | 0 | -1 | H    | OE2 |
| SER91 | Light | ARG5 | 6.38 | 0.12  | 0 | 1  | O    | HA  |
| ILE29 | Light | HIS6 | 6.42 | -0.13 | 0 | 0  | O    | HD2 |
| GLN90 | Light | PHE4 | 6.56 | -0.08 | 0 | 0  | HE22 | O   |
| GLN90 | Light | HIS6 | 6.68 | -0.10 | 0 | 0  | OE1  | HD2 |
| ILE29 | Light | ARG5 | 6.72 | -0.06 | 0 | 1  | HA   | HG3 |
| ILE2  | Light | PHE4 | 6.81 | -0.04 | 0 | 0  | HD12 | O   |
| ASN34 | Light | HIS6 | 6.84 | 0.00  | 0 | 0  | HD22 | HE2 |
| GLN90 | Light | ARG5 | 6.86 | -0.12 | 0 | 1  | OE1  | HA  |
| TYR32 | Light | PHE4 | 6.87 | -0.13 | 0 | 0  | HB2  | HE1 |
| SER30 | Light | ARG5 | 6.96 | -0.03 | 0 | 1  | HB2  | HD2 |
| SER28 | Light | ARG5 | 6.96 | -0.09 | 0 | 1  | O    | HG3 |
| SER31 | Light | HIS6 | 6.98 | -0.16 | 0 | 0  | H    | HB3 |
| GLN90 | Light | GLU3 | 7.37 | -0.03 | 0 | -1 | HE22 | HB2 |
| ILE2  | Light | HIS6 | 7.37 | -0.05 | 0 | 0  | HD12 | H   |
| SER30 | Light | ASP7 | 7.61 | -0.09 | 0 | -2 | HB2  | O   |
| LEU33 | Light | HIS6 | 7.73 | -0.04 | 0 | 0  | N    | HD2 |
| PRO95 | Light | ALA2 | 7.80 | -0.41 | 0 | 1  | HD2  | HB3 |
| ASP1  | Light | PHE4 | 7.87 | -0.04 | 0 | 0  | HA   | O   |
| SER93 | Light | ASP7 | 7.93 | 0.02  | 0 | -2 | HB3  | N   |
| TYR92 | Light | GLU3 | 7.94 | -0.03 | 0 | -1 | O    | C   |
| PRO95 | Light | ARG5 | 7.94 | -0.09 | 0 | 1  | N    | HA  |
| SER93 | Light | ALA2 | 7.95 | 0.08  | 0 | 1  | HB2  | C   |

**Table S18** – Quantum biochemistry details of RC MD2-#6

| <b>Adu Residue</b> | <b>Adu Chain</b> | <b>A<math>\beta</math> Residue</b> | <b>Distance (Å)</b> | <b>Interaction Energy (kcal/mol)</b> | <b>Adu Residue Charge</b> | <b>A<math>\beta</math> Residue Charge</b> | <b>Adu Atom</b> | <b>A<math>\beta</math> Atom</b> |
|--------------------|------------------|------------------------------------|---------------------|--------------------------------------|---------------------------|-------------------------------------------|-----------------|---------------------------------|
| LYS65              | Heavy            | GLU3                               | 1.70                | -11.86                               | 1                         | -1                                        | HZ2             | OE2                             |
| PRO108             | Heavy            | HIS6                               | 1.83                | -5.15                                | 0                         | 0                                         | O               | HE2                             |
| ILE102             | Heavy            | HIS6                               | 2.27                | -1.11                                | 0                         | 0                                         | HG23            | HE1                             |
| GLY107             | Heavy            | HIS6                               | 2.56                | -1.78                                | 0                         | 0                                         | O               | HE1                             |
| ARG105             | Heavy            | PHE4                               | 2.68                | -1.79                                | 1                         | 0                                         | HG3             | HE2                             |
| TYR59              | Heavy            | GLU3                               | 2.82                | -2.14                                | 0                         | -1                                        | HD1             | HA                              |
| TYR59              | Heavy            | PHE4                               | 2.87                | -4.13                                | 0                         | 0                                         | CZ              | HB3                             |
| TYR59              | Heavy            | ALA2                               | 2.91                | -0.63                                | 0                         | 1                                         | HE1             | O                               |
| PRO108             | Heavy            | PHE4                               | 3.12                | -1.97                                | 0                         | 0                                         | HD3             | HD1                             |
| TRP52              | Heavy            | PHE4                               | 3.18                | -3.03                                | 0                         | 0                                         | HZ2             | HE2                             |
| GLY107             | Heavy            | PHE4                               | 3.28                | -1.13                                | 0                         | 0                                         | HA3             | CE1                             |
| ALA104             | Heavy            | ASP7                               | 3.34                | -0.83                                | 0                         | -2                                        | HB2             | OD1                             |
| GLY103             | Heavy            | HIS6                               | 3.55                | -0.49                                | 0                         | 0                                         | HA3             | ND1                             |
| ASP62              | Heavy            | GLU3                               | 3.90                | 2.73                                 | -1                        | -1                                        | OD1             | OE2                             |
| TYR109             | Heavy            | HIS6                               | 3.99                | -1.74                                | 0                         | 0                                         | HA              | HE2                             |
| TYR60              | Heavy            | GLU3                               | 4.04                | 1.36                                 | 0                         | -1                                        | H               | OE1                             |
| GLY103             | Heavy            | ASP7                               | 4.30                | -0.60                                | 0                         | -2                                        | HA3             | H                               |
| ARG105             | Heavy            | ASP7                               | 4.46                | -2.72                                | 1                         | -2                                        | HG2             | OD1                             |
| GLY101             | Heavy            | HIS6                               | 4.50                | 0.09                                 | 0                         | 0                                         | C               | HE1                             |
| ARG106             | Heavy            | HIS6                               | 4.55                | -0.16                                | 1                         | 0                                         | C               | HE1                             |
| ARG106             | Heavy            | PHE4                               | 4.60                | 0.21                                 | 1                         | 0                                         | H               | HZ                              |
| TRP47              | Heavy            | GLU3                               | 4.68                | -0.16                                | 0                         | -1                                        | HH2             | OE1                             |
| LYS65              | Heavy            | ALA2                               | 4.89                | 1.53                                 | 1                         | 1                                         | HE2             | H                               |
| LYS57              | Heavy            | ALA2                               | 4.96                | 1.23                                 | 1                         | 1                                         | HZ3             | O                               |
| ILE102             | Heavy            | PHE4                               | 5.04                | -0.22                                | 0                         | 0                                         | O               | HZ                              |
| GLY103             | Heavy            | PHE4                               | 5.25                | -0.09                                | 0                         | 0                                         | HA3             | HZ                              |
| THR61              | Heavy            | GLU3                               | 5.30                | 0.04                                 | 0                         | -1                                        | HA              | OE1                             |
| LYS57              | Heavy            | PHE4                               | 5.53                | -0.16                                | 1                         | 0                                         | HE2             | HD2                             |
| ARG105             | Heavy            | HIS6                               | 5.60                | -0.35                                | 1                         | 0                                         | HB3             | HE1                             |
| ALA104             | Heavy            | HIS6                               | 5.73                | -0.17                                | 0                         | 0                                         | H               | ND1                             |
| VAL50              | Heavy            | PHE4                               | 5.95                | -0.14                                | 0                         | 0                                         | HG11            | HB2                             |
| ILE102             | Heavy            | ASP7                               | 5.96                | -0.15                                | 0                         | -2                                        | HG21            | H                               |
| TYR59              | Heavy            | ARG5                               | 5.97                | -0.23                                | 0                         | 1                                         | HH              | H                               |
| ALA104             | Heavy            | PHE4                               | 6.02                | 0.05                                 | 0                         | 0                                         | C               | HZ                              |
| TRP52              | Heavy            | ARG5                               | 6.08                | -0.11                                | 0                         | 1                                         | HH2             | H                               |
| PRO108             | Heavy            | ARG5                               | 6.08                | -0.35                                | 0                         | 1                                         | HD3             | HA                              |
| ARG105             | Heavy            | ARG5                               | 6.12                | 0.64                                 | 1                         | 1                                         | HG2             | O                               |
| ASP99              | Heavy            | HIS6                               | 6.17                | -0.24                                | -1                        | 0                                         | OD2             | HE2                             |
| TRP52              | Heavy            | HIS6                               | 6.34                | -0.13                                | 0                         | 0                                         | HZ2             | HE1                             |
| LYS58              | Heavy            | ALA2                               | 6.59                | 0.65                                 | 1                         | 1                                         | O               | O                               |
| TRP47              | Heavy            | PHE4                               | 6.62                | -0.07                                | 0                         | 0                                         | HH2             | H                               |
| TYR60              | Heavy            | ALA2                               | 6.66                | -0.22                                | 0                         | 1                                         | H               | O                               |

|        |       |      |      |        |    |    |      |      |
|--------|-------|------|------|--------|----|----|------|------|
| TYR60  | Heavy | PHE4 | 6.80 | -0.04  | 0  | 0  | H    | H    |
| TYR110 | Heavy | HIS6 | 6.81 | -0.11  | 0  | 0  | H    | HE2  |
| GLY107 | Heavy | ARG5 | 6.82 | -0.05  | 0  | 1  | HA3  | HA   |
| LYS57  | Heavy | GLU3 | 6.85 | -1.47  | 1  | -1 | HZ3  | HA   |
| LYS58  | Heavy | GLU3 | 6.90 | -1.03  | 1  | -1 | O    | HA   |
| LYS58  | Heavy | PHE4 | 6.90 | -0.12  | 1  | 0  | O    | HB3  |
| TYR109 | Heavy | PHE4 | 6.96 | -0.09  | 0  | 0  | N    | HE1  |
| LYS65  | Heavy | PHE4 | 6.96 | -0.16  | 1  | 0  | HZ2  | H    |
| GLY107 | Heavy | ASP7 | 7.00 | -0.08  | 0  | -2 | H    | H    |
| ARG106 | Heavy | ASP7 | 7.07 | -1.66  | 1  | -2 | H    | OD1  |
| ARG100 | Heavy | HIS6 | 7.17 | 0.00   | 1  | 0  | O    | HE1  |
| GLY101 | Heavy | PHE4 | 7.18 | -0.02  | 0  | 0  | HA2  | HE1  |
| TRP52  | Heavy | GLU3 | 7.24 | -0.01  | 0  | -1 | HH2  | C    |
| VAL50  | Heavy | GLU3 | 7.25 | 0.03   | 0  | -1 | HG12 | OE1  |
| HIS35  | Heavy | HIS6 | 7.31 | -0.01  | 0  | 0  | HE1  | HE2  |
| GLY103 | Heavy | ARG5 | 7.40 | 0.01   | 0  | 1  | HA3  | O    |
| HIS35  | Heavy | PHE4 | 7.70 | -0.02  | 0  | 0  | HE1  | HD1  |
| VAL50  | Heavy | HIS6 | 7.71 | -0.01  | 0  | 0  | HG11 | HE2  |
| PRO108 | Heavy | GLU3 | 7.87 | -0.04  | 0  | -1 | HG2  | HB2  |
| ILE102 | Heavy | ARG5 | 7.90 | -0.05  | 0  | 1  | HG21 | C    |
| ASP62  | Heavy | ALA2 | 7.95 | -1.22  | -1 | 1  | OD1  | HA   |
| ALA104 | Heavy | ARG5 | 7.96 | 0.07   | 0  | 1  | HB2  | O    |
| THR94  | Light | GLU3 | 1.85 | -11.37 | 0  | -1 | HG1  | OE1  |
| THR94  | Light | PHE4 | 2.05 | -7.12  | 0  | 0  | OG1  | H    |
| TYR92  | Light | HIS6 | 2.05 | -4.24  | 0  | 0  | HD1  | HB3  |
| SER93  | Light | ARG5 | 2.13 | -4.02  | 0  | 1  | HB2  | HB2  |
| TYR92  | Light | ARG5 | 2.14 | -8.81  | 0  | 1  | OH   | HH22 |
| SER93  | Light | PHE4 | 2.30 | -2.87  | 0  | 0  | HA   | O    |
| PRO95  | Light | GLU3 | 2.73 | -1.24  | 0  | -1 | HD2  | HG3  |
| TYR32  | Light | HIS6 | 2.98 | -3.82  | 0  | 0  | HE1  | HB3  |
| SER91  | Light | HIS6 | 2.98 | -0.65  | 0  | 0  | O    | HD2  |
| TYR32  | Light | ASP7 | 3.62 | -0.47  | 0  | -2 | HH   | OXT  |
| THR94  | Light | ARG5 | 3.98 | -1.51  | 0  | 1  | H    | HA   |
| TYR92  | Light | PHE4 | 3.98 | -2.38  | 0  | 0  | O    | HD1  |
| TYR92  | Light | ASP7 | 4.16 | 0.18   | 0  | -2 | HE1  | O    |
| SER93  | Light | HIS6 | 4.35 | -0.99  | 0  | 0  | HA   | H    |
| LEU96  | Light | PHE4 | 4.38 | -0.30  | 0  | 0  | HD21 | HD1  |
| SER93  | Light | GLU3 | 4.70 | -0.21  | 0  | -1 | HB2  | HB2  |
| SER91  | Light | PHE4 | 5.07 | -0.23  | 0  | 0  | O    | HD1  |
| SER30  | Light | HIS6 | 5.35 | -0.13  | 0  | 0  | HB3  | HB3  |
| THR94  | Light | ALA2 | 5.38 | -0.78  | 0  | 1  | HG1  | C    |
| PRO95  | Light | PHE4 | 5.60 | -0.06  | 0  | 0  | N    | H    |
| SER91  | Light | ARG5 | 5.60 | 0.02   | 0  | 1  | O    | HA   |
| LEU96  | Light | HIS6 | 5.63 | -0.10  | 0  | 0  | HD22 | HE2  |
| ILE2   | Light | ARG5 | 5.64 | -0.08  | 0  | 1  | HD12 | HD2  |
| ILE29  | Light | HIS6 | 5.88 | -0.17  | 0  | 0  | O    | HB3  |
| THR94  | Light | HIS6 | 6.12 | -0.12  | 0  | 0  | H    | H    |
| LEU96  | Light | ARG5 | 6.19 | -0.07  | 0  | 1  | HD21 | HA   |



|       |       |      |      |       |   |    |      |      |
|-------|-------|------|------|-------|---|----|------|------|
| ASP1  | Light | GLU3 | 6.25 | 0.02  | 0 | -1 | HA   | HG3  |
| ILE29 | Light | ARG5 | 6.38 | -0.10 | 0 | 1  | HG22 | HB3  |
| SER30 | Light | ASP7 | 6.40 | -0.15 | 0 | -2 | HB2  | O    |
| GLN90 | Light | PHE4 | 6.42 | -0.08 | 0 | 0  | HE22 | O    |
| GLN90 | Light | HIS6 | 6.43 | -0.13 | 0 | 0  | OE1  | HD2  |
| LEU96 | Light | GLU3 | 6.55 | -0.12 | 0 | -1 | H    | OE1  |
| GLN90 | Light | ARG5 | 6.72 | -0.12 | 0 | 1  | HE22 | HB2  |
| SER28 | Light | ARG5 | 6.72 | -0.18 | 0 | 1  | O    | HD2  |
| SER31 | Light | HIS6 | 6.74 | -0.13 | 0 | 0  | H    | HB3  |
| TYR32 | Light | ARG5 | 6.80 | -0.22 | 0 | 1  | HE1  | C    |
| ILE2  | Light | PHE4 | 7.11 | -0.04 | 0 | 0  | HD12 | O    |
| GLN90 | Light | GLU3 | 7.18 | -0.02 | 0 | -1 | HE22 | HB2  |
| GLN27 | Light | ARG5 | 7.22 | 0.15  | 0 | 1  | HB2  | HD2  |
| ASN34 | Light | HIS6 | 7.25 | -0.01 | 0 | 0  | HD22 | HE2  |
| TYR32 | Light | PHE4 | 7.32 | -0.09 | 0 | 0  | CZ   | HE1  |
| ILE2  | Light | HIS6 | 7.40 | -0.06 | 0 | 0  | HD12 | H    |
| TYR92 | Light | GLU3 | 7.47 | 0.01  | 0 | -1 | O    | HB2  |
| PRO95 | Light | ALA2 | 7.54 | -0.25 | 0 | 1  | HD2  | C    |
| PRO95 | Light | ARG5 | 7.68 | -0.13 | 0 | 1  | HD3  | HB2  |
| SER30 | Light | ARG5 | 7.81 | -0.02 | 0 | 1  | HB2  | HH22 |
| ILE2  | Light | GLU3 | 7.88 | 0.00  | 0 | -1 | HG13 | HB2  |
| LEU33 | Light | HIS6 | 7.97 | -0.05 | 0 | 0  | N    | HD2  |

**Table S19** – Quantum biochemistry details of RC MD2-#7

| Adu Residue | Adu Chain | A $\beta$ Residue | Distance (Å) | Interaction Energy (kcal/mol) | Adu Residue Charge | A $\beta$ Residue Charge | Adu Atom | A $\beta$ Atom |
|-------------|-----------|-------------------|--------------|-------------------------------|--------------------|--------------------------|----------|----------------|
| LYS65       | Heavy     | GLU3              | 1.63         | -11.62                        | 1                  | -1                       | HZ1      | OE1            |
| PRO108      | Heavy     | HIS6              | 1.74         | -3.87                         | 0                  | 0                        | O        | HE2            |
| ARG105      | Heavy     | ASP7              | 1.88         | -12.29                        | 1                  | -2                       | HE       | OD1            |
| ARG105      | Heavy     | ARG5              | 2.11         | -1.31                         | 1                  | 1                        | HH11     | O              |
| ILE102      | Heavy     | HIS6              | 2.25         | -1.53                         | 0                  | 0                        | HG22     | HE1            |
| GLY107      | Heavy     | HIS6              | 2.32         | -0.65                         | 0                  | 0                        | O        | HE1            |
| ARG105      | Heavy     | HIS6              | 2.41         | -0.94                         | 1                  | 0                        | HH12     | HA             |
| GLY107      | Heavy     | PHE4              | 2.47         | -1.11                         | 0                  | 0                        | HA3      | HE1            |
| ARG105      | Heavy     | PHE4              | 2.61         | -2.24                         | 1                  | 0                        | HH21     | HE2            |
| TYR59       | Heavy     | PHE4              | 2.63         | -4.38                         | 0                  | 0                        | HH       | HD2            |
| TYR59       | Heavy     | GLU3              | 2.76         | -3.20                         | 0                  | -1                       | HE1      | HB2            |
| TRP52       | Heavy     | PHE4              | 3.08         | -3.67                         | 0                  | 0                        | HZ2      | HE2            |
| PRO108      | Heavy     | PHE4              | 3.28         | -1.58                         | 0                  | 0                        | HD3      | HE1            |
| TYR109      | Heavy     | HIS6              | 3.39         | -2.45                         | 0                  | 0                        | HA       | HE2            |
| ASP62       | Heavy     | GLU3              | 3.83         | 3.18                          | -1                 | -1                       | OD2      | OE1            |
| ARG106      | Heavy     | HIS6              | 4.11         | -0.29                         | 1                  | 0                        | C        | HE1            |
| TYR60       | Heavy     | GLU3              | 4.13         | 0.32                          | 0                  | -1                       | O        | OE1            |
| GLY101      | Heavy     | HIS6              | 4.51         | -0.08                         | 0                  | 0                        | HA2      | HE1            |
| ALA104      | Heavy     | ASP7              | 4.67         | -0.43                         | 0                  | -2                       | HB1      | OD1            |
| ARG106      | Heavy     | PHE4              | 4.68         | 0.23                          | 1                  | 0                        | C        | HZ             |

|        |       |      |      |       |    |    |      |     |
|--------|-------|------|------|-------|----|----|------|-----|
| LYS57  | Heavy | PHE4 | 5.12 | -0.24 | 1  | 0  | HD2  | HD2 |
| GLY103 | Heavy | HIS6 | 5.39 | -0.05 | 0  | 0  | HA3  | HE1 |
| TRP47  | Heavy | GLU3 | 5.61 | -0.04 | 0  | -1 | HH2  | HB3 |
| ILE102 | Heavy | PHE4 | 5.65 | -0.14 | 0  | 0  | O    | HZ  |
| TRP52  | Heavy | HIS6 | 5.68 | -0.17 | 0  | 0  | HZ2  | HE1 |
| VAL50  | Heavy | PHE4 | 5.69 | -0.15 | 0  | 0  | HG11 | HB2 |
| LYS58  | Heavy | GLU3 | 5.70 | -1.13 | 1  | -1 | O    | OE2 |
| ARG105 | Heavy | GLU3 | 5.73 | -0.85 | 1  | -1 | HH21 | O   |
| GLY103 | Heavy | ASP7 | 5.81 | -0.34 | 0  | -2 | HA3  | OD1 |
| THR61  | Heavy | GLU3 | 5.91 | 0.06  | 0  | -1 | HA   | OE1 |
| TRP47  | Heavy | PHE4 | 5.94 | -0.12 | 0  | 0  | HH2  | HB2 |
| GLY107 | Heavy | ARG5 | 5.96 | -0.17 | 0  | 1  | HA3  | C   |
| PRO108 | Heavy | ARG5 | 6.24 | -0.38 | 0  | 1  | HD3  | HA  |
| ILE102 | Heavy | ASP7 | 6.26 | -0.05 | 0  | -2 | HG23 | H   |
| GLY107 | Heavy | ASP7 | 6.33 | -0.04 | 0  | -2 | HA3  | H   |
| ASP99  | Heavy | HIS6 | 6.41 | -0.22 | -1 | 0  | OD2  | HE2 |
| TYR110 | Heavy | HIS6 | 6.45 | -0.14 | 0  | 0  | N    | HE2 |
| TYR59  | Heavy | ARG5 | 6.48 | -0.25 | 0  | 1  | OH   | H   |
| ARG106 | Heavy | ASP7 | 6.49 | -1.51 | 1  | -2 | H    | OD1 |
| ASP62  | Heavy | ALA2 | 6.50 | -1.65 | -1 | 1  | OD1  | H3  |
| TRP52  | Heavy | ARG5 | 6.54 | -0.11 | 0  | 1  | HH2  | N   |
| LYS58  | Heavy | PHE4 | 6.57 | -0.19 | 1  | 0  | O    | HB3 |
| GLY103 | Heavy | PHE4 | 6.81 | -0.03 | 0  | 0  | HA3  | HZ  |
| LYS57  | Heavy | GLU3 | 6.83 | -1.25 | 1  | -1 | HZ3  | O   |
| TYR59  | Heavy | ALA2 | 6.89 | -0.14 | 0  | 1  | HE1  | C   |
| ALA104 | Heavy | PHE4 | 6.93 | 0.00  | 0  | 0  | C    | HZ  |
| LYS65  | Heavy | PHE4 | 7.10 | -0.17 | 1  | 0  | HZ1  | H   |
| TYR60  | Heavy | PHE4 | 7.17 | -0.08 | 0  | 0  | H    | H   |
| TYR109 | Heavy | PHE4 | 7.23 | -0.09 | 0  | 0  | N    | HE1 |
| TRP52  | Heavy | GLU3 | 7.30 | -0.02 | 0  | -1 | HH2  | C   |
| GLY101 | Heavy | PHE4 | 7.35 | -0.02 | 0  | 0  | HA2  | HE1 |
| ALA104 | Heavy | HIS6 | 7.35 | -0.04 | 0  | 0  | N    | HE1 |
| HIS35  | Heavy | HIS6 | 7.41 | -0.01 | 0  | 0  | HE1  | HE2 |
| LYS65  | Heavy | ALA2 | 7.50 | 1.57  | 1  | 1  | HZ1  | C   |
| ARG100 | Heavy | HIS6 | 7.58 | -0.02 | 1  | 0  | C    | HE1 |
| HIS35  | Heavy | PHE4 | 7.62 | -0.02 | 0  | 0  | HE1  | HD1 |
| VAL50  | Heavy | GLU3 | 7.63 | 0.03  | 0  | -1 | HG12 | HB3 |
| ARG105 | Heavy | ALA2 | 7.89 | 0.77  | 1  | 1  | HH11 | HB3 |
| PHE53  | Heavy | PHE4 | 7.96 | -0.05 | 0  | 0  | HE2  | HE2 |
| THR94  | Light | PHE4 | 1.92 | -5.30 | 0  | 0  | H    | O   |
| TYR92  | Light | HIS6 | 1.93 | -6.23 | 0  | 0  | O    | H   |
| THR94  | Light | GLU3 | 2.12 | -2.28 | 0  | -1 | HG1  | H   |
| SER93  | Light | ARG5 | 2.23 | -4.93 | 0  | 1  | HA   | HA  |
| SER93  | Light | PHE4 | 2.40 | -4.47 | 0  | 0  | HA   | O   |
| SER93  | Light | ALA2 | 2.43 | -0.02 | 0  | 1  | HG   | HB1 |
| TYR92  | Light | ARG5 | 2.46 | -8.72 | 0  | 1  | O    | HA  |
| SER91  | Light | HIS6 | 2.60 | -0.77 | 0  | 0  | O    | HD2 |
| TYR32  | Light | HIS6 | 2.73 | -3.18 | 0  | 0  | HE2  | HB3 |

|       |       |      |      |       |   |    |      |     |
|-------|-------|------|------|-------|---|----|------|-----|
| THR94 | Light | ALA2 | 2.84 | -1.97 | 0 | 1  | O    | HA  |
| THR94 | Light | ARG5 | 3.66 | -1.35 | 0 | 1  | H    | HA  |
| SER93 | Light | HIS6 | 3.77 | -1.74 | 0 | 0  | HA   | H   |
| TYR32 | Light | ASP7 | 4.01 | -0.39 | 0 | -2 | HH   | OXT |
| TYR92 | Light | PHE4 | 4.13 | -2.16 | 0 | 0  | O    | HD1 |
| LEU96 | Light | PHE4 | 4.17 | -0.42 | 0 | 0  | HD22 | HD1 |
| ASP1  | Light | ALA2 | 4.23 | -0.50 | 0 | 1  | OD2  | H2  |
| TYR92 | Light | ASP7 | 4.41 | -0.29 | 0 | -2 | HE1  | N   |
| PRO95 | Light | ALA2 | 4.51 | -0.63 | 0 | 1  | HD3  | H2  |
| PRO95 | Light | GLU3 | 4.75 | -0.64 | 0 | -1 | HD2  | H   |
| ILE2  | Light | ALA2 | 5.14 | -0.16 | 0 | 1  | HD11 | HB1 |
| SER91 | Light | PHE4 | 5.32 | -0.16 | 0 | 0  | O    | HE1 |
| LEU96 | Light | HIS6 | 5.34 | -0.17 | 0 | 0  | HD23 | HE2 |
| SER30 | Light | HIS6 | 5.41 | -0.12 | 0 | 0  | HB3  | HB3 |
| LEU96 | Light | ARG5 | 5.46 | -0.12 | 0 | 1  | HD22 | HA  |
| THR94 | Light | HIS6 | 5.56 | -0.12 | 0 | 0  | H    | H   |
| SER91 | Light | ARG5 | 5.56 | -0.03 | 0 | 1  | O    | HA  |
| SER93 | Light | GLU3 | 5.60 | 0.40  | 0 | -1 | OG   | H   |
| PRO95 | Light | PHE4 | 5.83 | -0.05 | 0 | 0  | N    | H   |
| ILE2  | Light | ARG5 | 5.96 | -0.05 | 0 | 1  | HD11 | HB2 |
| TYR92 | Light | ALA2 | 6.07 | -0.22 | 0 | 1  | O    | HB3 |
| ASP1  | Light | GLU3 | 6.12 | 0.22  | 0 | -1 | OD2  | H   |
| ILE29 | Light | HIS6 | 6.40 | -0.11 | 0 | 0  | O    | HD2 |
| GLN90 | Light | HIS6 | 6.44 | -0.12 | 0 | 0  | OE1  | HD2 |
| TYR32 | Light | ARG5 | 6.52 | -0.12 | 0 | 1  | HE2  | HB3 |
| ASN34 | Light | HIS6 | 6.76 | -0.02 | 0 | 0  | HD22 | HE2 |
| GLN90 | Light | PHE4 | 6.77 | -0.06 | 0 | 0  | HE22 | O   |
| GLN27 | Light | ALA2 | 6.94 | -0.02 | 0 | 1  | HE22 | HB1 |
| GLN90 | Light | ARG5 | 6.97 | -0.08 | 0 | 1  | HE22 | HB2 |
| SER30 | Light | ASP7 | 6.98 | -0.09 | 0 | -2 | HB2  | OXT |
| GLN90 | Light | ALA2 | 7.03 | 0.00  | 0 | 1  | HE22 | HA  |
| ILE29 | Light | ARG5 | 7.07 | -0.04 | 0 | 1  | HA   | HB3 |
| SER31 | Light | HIS6 | 7.21 | -0.09 | 0 | 0  | H    | HB3 |
| TYR32 | Light | PHE4 | 7.35 | -0.06 | 0 | 0  | HE2  | HE1 |
| SER28 | Light | ARG5 | 7.52 | -0.13 | 0 | 1  | O    | HB3 |
| ILE2  | Light | PHE4 | 7.55 | -0.03 | 0 | 0  | HG13 | O   |
| PRO95 | Light | ARG5 | 7.56 | -0.13 | 0 | 1  | N    | HB2 |
| LEU96 | Light | GLU3 | 7.77 | -0.05 | 0 | -1 | HG   | HB3 |
| LEU96 | Light | ALA2 | 7.85 | -0.08 | 0 | 1  | HD22 | HB3 |
| SER30 | Light | ARG5 | 7.97 | -0.02 | 0 | 1  | HB3  | HB3 |
| LEU33 | Light | HIS6 | 8.00 | -0.05 | 0 | 0  | N    | HD2 |

**Table S20** – Quantum biochemistry details of RC MD2-#8

| Adu Residue | Adu Chain | A $\beta$ Residue | Distance (Å) | Interaction Energy (kcal/mol) | Adu Residue Charge | A $\beta$ Residue Charge | Adu Atom | A $\beta$ Atom |
|-------------|-----------|-------------------|--------------|-------------------------------|--------------------|--------------------------|----------|----------------|
| LYS65       | Heavy     | GLU3              | 1.65         | -13.85                        | 1                  | -1                       | HZ2      | OE2            |

|        |       |      |      |       |    |    |      |     |
|--------|-------|------|------|-------|----|----|------|-----|
| PRO108 | Heavy | HIS6 | 1.97 | -5.14 | 0  | 0  | O    | HE2 |
| ARG105 | Heavy | PHE4 | 2.00 | -2.26 | 1  | 0  | HB3  | HE2 |
| TYR59  | Heavy | GLU3 | 2.11 | -1.95 | 0  | -1 | HD1  | HB2 |
| ILE102 | Heavy | HIS6 | 2.27 | -0.58 | 0  | 0  | HG22 | HE1 |
| GLY107 | Heavy | HIS6 | 2.50 | -2.02 | 0  | 0  | O    | HE1 |
| GLY107 | Heavy | PHE4 | 2.53 | -0.51 | 0  | 0  | HA3  | HZ  |
| TYR59  | Heavy | PHE4 | 2.92 | -3.47 | 0  | 0  | CZ   | HB3 |
| TRP52  | Heavy | PHE4 | 3.03 | -3.83 | 0  | 0  | HZ2  | HE2 |
| ALA104 | Heavy | ASP7 | 3.07 | -0.72 | 0  | -2 | HB3  | OD1 |
| PRO108 | Heavy | PHE4 | 3.54 | -1.21 | 0  | 0  | HD3  | HE1 |
| ARG105 | Heavy | GLU3 | 3.58 | -0.92 | 1  | -1 | HH21 | O   |
| GLY103 | Heavy | HIS6 | 3.60 | -0.14 | 0  | 0  | HA3  | ND1 |
| TYR109 | Heavy | HIS6 | 3.62 | -2.06 | 0  | 0  | HA   | HE2 |
| ARG105 | Heavy | ARG5 | 3.64 | 0.55  | 1  | 1  | HH22 | H   |
| ARG106 | Heavy | PHE4 | 3.93 | 0.39  | 1  | 0  | H    | HZ  |
| TYR60  | Heavy | GLU3 | 4.25 | 0.00  | 0  | -1 | H    | OE1 |
| ILE102 | Heavy | PHE4 | 4.34 | -0.27 | 0  | 0  | O    | HZ  |
| ARG106 | Heavy | HIS6 | 4.37 | -0.41 | 1  | 0  | C    | HE1 |
| GLY101 | Heavy | HIS6 | 4.42 | 0.30  | 0  | 0  | C    | HE1 |
| ARG105 | Heavy | ASP7 | 4.44 | -3.03 | 1  | -2 | HD3  | OD2 |
| GLY103 | Heavy | ASP7 | 4.60 | -0.95 | 0  | -2 | HA3  | H   |
| GLY103 | Heavy | PHE4 | 4.67 | -0.10 | 0  | 0  | HA3  | HZ  |
| ASP62  | Heavy | GLU3 | 4.94 | 1.75  | -1 | -1 | OD2  | OE2 |
| VAL50  | Heavy | PHE4 | 5.34 | -0.16 | 0  | 0  | HG13 | HB2 |
| ALA104 | Heavy | HIS6 | 5.38 | -0.31 | 0  | 0  | H    | ND1 |
| ARG105 | Heavy | HIS6 | 5.52 | -0.47 | 1  | 0  | H    | HA  |
| LYS58  | Heavy | GLU3 | 5.59 | -1.05 | 1  | -1 | O    | OE1 |
| ALA104 | Heavy | PHE4 | 5.67 | 0.05  | 0  | 0  | HB3  | HE2 |
| TRP52  | Heavy | ARG5 | 6.01 | -0.11 | 0  | 1  | HH2  | H   |
| TRP47  | Heavy | GLU3 | 6.09 | -0.02 | 0  | -1 | HH2  | HB3 |
| LYS65  | Heavy | ALA2 | 6.18 | 1.64  | 1  | 1  | HZ2  | HA  |
| TRP52  | Heavy | HIS6 | 6.20 | -0.13 | 0  | 0  | HZ2  | HE1 |
| ARG105 | Heavy | ALA2 | 6.27 | 0.88  | 1  | 1  | HH21 | O   |
| ILE102 | Heavy | ASP7 | 6.27 | -0.14 | 0  | -2 | HG23 | H   |
| TYR59  | Heavy | ALA2 | 6.27 | 0.00  | 0  | 1  | HD1  | C   |
| LYS57  | Heavy | PHE4 | 6.28 | -0.09 | 1  | 0  | HD2  | HD2 |
| ARG106 | Heavy | ASP7 | 6.32 | -1.74 | 1  | -2 | H    | OD2 |
| TRP47  | Heavy | PHE4 | 6.37 | -0.08 | 0  | 0  | HH2  | HB2 |
| THR61  | Heavy | GLU3 | 6.38 | 0.10  | 0  | -1 | HA   | OE2 |
| GLY107 | Heavy | ARG5 | 6.39 | -0.20 | 0  | 1  | HA3  | C   |
| LYS58  | Heavy | PHE4 | 6.54 | -0.12 | 1  | 0  | O    | HB3 |
| TYR110 | Heavy | HIS6 | 6.64 | -0.11 | 0  | 0  | N    | HE2 |
| TYR109 | Heavy | PHE4 | 6.68 | -0.09 | 0  | 0  | N    | HE1 |
| LYS65  | Heavy | PHE4 | 6.73 | -0.17 | 1  | 0  | HZ2  | H   |
| ASP99  | Heavy | HIS6 | 6.75 | -0.20 | -1 | 0  | OD1  | HE2 |
| ALA104 | Heavy | ARG5 | 6.82 | 0.02  | 0  | 1  | HB3  | O   |
| GLY107 | Heavy | ASP7 | 6.87 | 0.06  | 0  | -2 | H    | H   |
| TYR59  | Heavy | ARG5 | 6.88 | -0.19 | 0  | 1  | CZ   | H   |

|        |       |      |      |       |    |    |      |      |
|--------|-------|------|------|-------|----|----|------|------|
| PRO108 | Heavy | ARG5 | 6.89 | -0.32 | 0  | 1  | HD3  | HA   |
| TRP52  | Heavy | GLU3 | 6.92 | -0.05 | 0  | -1 | HH2  | O    |
| LYS57  | Heavy | GLU3 | 7.03 | -1.08 | 1  | -1 | HD3  | O    |
| GLY103 | Heavy | ARG5 | 7.15 | -0.01 | 0  | 1  | HA3  | O    |
| PHE53  | Heavy | PHE4 | 7.17 | -0.07 | 0  | 0  | HE2  | HE2  |
| GLY101 | Heavy | PHE4 | 7.18 | -0.02 | 0  | 0  | HA2  | HE1  |
| VAL50  | Heavy | GLU3 | 7.27 | 0.01  | 0  | -1 | HG11 | HB3  |
| TYR60  | Heavy | PHE4 | 7.37 | -0.05 | 0  | 0  | H    | H    |
| HIS35  | Heavy | HIS6 | 7.42 | 0.00  | 0  | 0  | HE1  | HE2  |
| ARG100 | Heavy | HIS6 | 7.47 | -0.02 | 1  | 0  | C    | HE1  |
| HIS35  | Heavy | PHE4 | 7.57 | -0.03 | 0  | 0  | HE1  | HD1  |
| ASP62  | Heavy | ALA2 | 7.63 | -1.29 | -1 | 1  | OD2  | HA   |
| ARG106 | Heavy | ARG5 | 7.63 | 0.57  | 1  | 1  | H    | O    |
| TRP52  | Heavy | ASP7 | 7.86 | -0.07 | 0  | -2 | HZ2  | OD2  |
| ILE102 | Heavy | ARG5 | 7.94 | -0.07 | 0  | 1  | O    | O    |
| THR94  | Light | PHE4 | 2.20 | -4.63 | 0  | 0  | OG1  | H    |
| TYR92  | Light | HIS6 | 2.25 | -4.36 | 0  | 0  | HA   | HD2  |
| TYR92  | Light | ARG5 | 2.26 | -4.59 | 0  | 1  | HH   | HH11 |
| SER93  | Light | ARG5 | 2.39 | -3.88 | 0  | 1  | HB3  | HB2  |
| THR94  | Light | ALA2 | 2.60 | -1.42 | 0  | 1  | O    | HB3  |
| THR94  | Light | GLU3 | 2.61 | -2.35 | 0  | -1 | HG1  | HB3  |
| SER91  | Light | HIS6 | 2.68 | -1.00 | 0  | 0  | O    | HD2  |
| SER93  | Light | ALA2 | 2.79 | -0.72 | 0  | 1  | HB2  | HB3  |
| SER93  | Light | PHE4 | 2.81 | -2.46 | 0  | 0  | HA   | O    |
| TYR32  | Light | HIS6 | 3.00 | -4.42 | 0  | 0  | HH   | HB2  |
| THR94  | Light | ARG5 | 4.08 | -0.96 | 0  | 1  | H    | HA   |
| SER93  | Light | HIS6 | 4.14 | -1.04 | 0  | 0  | HB3  | H    |
| LEU96  | Light | PHE4 | 4.22 | -0.38 | 0  | 0  | HD22 | HD1  |
| TYR92  | Light | PHE4 | 4.24 | -1.28 | 0  | 0  | O    | HD1  |
| PRO95  | Light | GLU3 | 4.35 | -0.72 | 0  | -1 | HD2  | OE2  |
| ASP1   | Light | ALA2 | 4.42 | -0.87 | 0  | 1  | OD1  | HB1  |
| SER91  | Light | PHE4 | 4.49 | -0.29 | 0  | 0  | O    | HE1  |
| PRO95  | Light | ALA2 | 4.63 | -0.61 | 0  | 1  | HD2  | HB3  |
| ILE2   | Light | ARG5 | 4.80 | -0.17 | 0  | 1  | HD11 | HH22 |
| TYR92  | Light | ASP7 | 5.05 | 0.44  | 0  | -2 | HE1  | N    |
| TYR32  | Light | ASP7 | 5.17 | -0.18 | 0  | -2 | HH   | H    |
| ILE2   | Light | ALA2 | 5.26 | -0.14 | 0  | 1  | HG13 | HB1  |
| SER30  | Light | HIS6 | 5.46 | -0.15 | 0  | 0  | HB3  | HB3  |
| SER93  | Light | GLU3 | 5.60 | 0.28  | 0  | -1 | HB2  | H    |
| LEU96  | Light | HIS6 | 5.62 | -0.12 | 0  | 0  | HD22 | HD2  |
| LEU96  | Light | ARG5 | 5.65 | -0.10 | 0  | 1  | HD22 | HA   |
| SER28  | Light | ARG5 | 5.69 | -0.25 | 0  | 1  | HB3  | HH11 |
| SER91  | Light | ARG5 | 5.79 | 0.04  | 0  | 1  | O    | HA   |
| PRO95  | Light | PHE4 | 5.85 | -0.15 | 0  | 0  | N    | H    |
| GLN27  | Light | ARG5 | 6.04 | -0.01 | 0  | 1  | HB2  | HH21 |
| GLN90  | Light | HIS6 | 6.10 | -0.17 | 0  | 0  | OE1  | HD2  |
| TYR32  | Light | PHE4 | 6.21 | -0.10 | 0  | 0  | HE1  | HE1  |
| THR94  | Light | HIS6 | 6.24 | -0.08 | 0  | 0  | H    | H    |

|       |       |      |      |       |   |    |      |      |
|-------|-------|------|------|-------|---|----|------|------|
| ASP1  | Light | GLU3 | 6.26 | 0.26  | 0 | -1 | OD1  | H    |
| TYR92 | Light | ALA2 | 6.35 | -0.05 | 0 | 1  | O    | HB2  |
| ILE29 | Light | HIS6 | 6.43 | -0.13 | 0 | 0  | O    | HD2  |
| GLN90 | Light | ALA2 | 6.57 | -0.03 | 0 | 1  | HE22 | HB3  |
| LEU96 | Light | ALA2 | 6.62 | -0.07 | 0 | 1  | HD21 | HB3  |
| SER30 | Light | ASP7 | 6.64 | -0.23 | 0 | -2 | HG   | O    |
| SER30 | Light | ARG5 | 6.81 | 0.01  | 0 | 1  | HB2  | HH11 |
| ASN34 | Light | HIS6 | 6.92 | -0.01 | 0 | 0  | HD22 | HE2  |
| GLN90 | Light | PHE4 | 6.95 | -0.06 | 0 | 0  | HE22 | O    |
| GLN90 | Light | ARG5 | 6.98 | -0.08 | 0 | 1  | OE1  | HA   |
| SER31 | Light | HIS6 | 7.11 | -0.13 | 0 | 0  | H    | HB3  |
| ILE29 | Light | ARG5 | 7.16 | -0.08 | 0 | 1  | HA   | HB3  |
| ASP1  | Light | ARG5 | 7.39 | 0.03  | 0 | 1  | HA   | HH22 |
| TYR32 | Light | ARG5 | 7.53 | -0.22 | 0 | 1  | HH   | C    |
| LEU96 | Light | GLU3 | 7.62 | -0.05 | 0 | -1 | HG   | HB3  |
| ILE2  | Light | HIS6 | 7.74 | -0.06 | 0 | 0  | HD11 | H    |
| ILE2  | Light | PHE4 | 7.78 | -0.03 | 0 | 0  | HG13 | O    |
| SER93 | Light | ASP7 | 7.90 | 0.08  | 0 | -2 | HB3  | N    |

**Table S21** – Quantum biochemistry details of RC MD6-#0

| Adu Residue | Adu Chain | A $\beta$ Residue | Distance (Å) | Interaction Energy (kcal/mol) | Adu Residue Charge | A $\beta$ Residue Charge | Adu Atom | A $\beta$ Atom |
|-------------|-----------|-------------------|--------------|-------------------------------|--------------------|--------------------------|----------|----------------|
| TYR59       | Heavy     | GLU3              | 1.78         | -12.99                        | 0                  | -1                       | HH       | OE1            |
| LYS57       | Heavy     | GLU3              | 1.89         | -10.61                        | 1                  | -1                       | HZ2      | OE1            |
| ILE102      | Heavy     | HIS6              | 2.01         | -0.25                         | 0                  | 0                        | O        | HE1            |
| PRO108      | Heavy     | HIS6              | 2.04         | -5.33                         | 0                  | 0                        | O        | HE2            |
| LYS57       | Heavy     | PHE4              | 2.44         | -3.79                         | 1                  | 0                        | HE3      | H              |
| TYR59       | Heavy     | PHE4              | 2.46         | -1.62                         | 0                  | 0                        | OH       | H              |
| ARG105      | Heavy     | PHE4              | 2.56         | -6.43                         | 1                  | 0                        | HG3      | HB2            |
| GLY107      | Heavy     | HIS6              | 2.90         | -2.31                         | 0                  | 0                        | O        | HE2            |
| TRP52       | Heavy     | PHE4              | 3.23         | -3.02                         | 0                  | 0                        | HZ2      | HD2            |
| GLY103      | Heavy     | HIS6              | 3.39         | -1.04                         | 0                  | 0                        | HA3      | HE1            |
| ARG105      | Heavy     | ARG5              | 3.51         | 0.57                          | 1                  | 1                        | HG3      | H              |
| LYS57       | Heavy     | ALA2              | 3.56         | 1.86                          | 1                  | 1                        | HZ1      | O              |
| TYR109      | Heavy     | HIS6              | 3.86         | -2.01                         | 0                  | 0                        | HB3      | HE2            |
| THR56       | Heavy     | PHE4              | 3.94         | -0.41                         | 0                  | 0                        | OG1      | HE2            |
| ALA104      | Heavy     | ASP7              | 4.33         | -0.73                         | 0                  | -2                       | H        | OD1            |
| ARG106      | Heavy     | HIS6              | 4.50         | 0.02                          | 1                  | 0                        | HA       | HE1            |
| ARG105      | Heavy     | ALA2              | 4.68         | 1.17                          | 1                  | 1                        | HH11     | H2             |
| TRP52       | Heavy     | ARG5              | 4.81         | -0.21                         | 0                  | 1                        | HH2      | HA             |
| GLY107      | Heavy     | ARG5              | 4.90         | -0.13                         | 0                  | 1                        | HA3      | HA             |
| GLY103      | Heavy     | ASP7              | 4.91         | -0.58                         | 0                  | -2                       | HA2      | OD1            |
| ASP54       | Heavy     | PHE4              | 4.95         | -0.26                         | -1                 | 0                        | OD2      | HE2            |
| GLY101      | Heavy     | HIS6              | 4.97         | 0.05                          | 0                  | 0                        | HA2      | HE2            |
| PRO108      | Heavy     | ARG5              | 5.14         | -0.38                         | 0                  | 1                        | HD3      | HA             |
| PHE53       | Heavy     | PHE4              | 5.35         | -0.26                         | 0                  | 0                        | HE1      | HD2            |

|        |       |      |      |       |    |    |      |     |
|--------|-------|------|------|-------|----|----|------|-----|
| GLY107 | Heavy | PHE4 | 5.38 | -0.17 | 0  | 0  | HA3  | HB2 |
| ARG105 | Heavy | HIS6 | 5.41 | -0.43 | 1  | 0  | HB3  | HA  |
| TYR59  | Heavy | ALA2 | 5.48 | 0.04  | 0  | 1  | HH   | O   |
| TYR59  | Heavy | ARG5 | 5.69 | 0.03  | 0  | 1  | OH   | N   |
| ARG105 | Heavy | GLU3 | 5.74 | -1.30 | 1  | -1 | HG3  | C   |
| ALA104 | Heavy | HIS6 | 5.81 | -0.19 | 0  | 0  | H    | HA  |
| LYS58  | Heavy | GLU3 | 5.83 | -1.11 | 1  | -1 | H    | OE1 |
| PRO108 | Heavy | PHE4 | 5.91 | -0.13 | 0  | 0  | HD3  | O   |
| TRP52  | Heavy | HIS6 | 5.94 | -0.18 | 0  | 0  | HH2  | NE2 |
| ARG105 | Heavy | ASP7 | 5.98 | -2.40 | 1  | -2 | HG2  | OD2 |
| ARG106 | Heavy | PHE4 | 6.06 | -0.19 | 1  | 0  | N    | HB2 |
| GLY103 | Heavy | ARG5 | 6.25 | -0.09 | 0  | 1  | HA3  | O   |
| ASP99  | Heavy | HIS6 | 6.30 | -0.24 | -1 | 0  | OD1  | HE2 |
| LYS57  | Heavy | ARG5 | 6.39 | 0.92  | 1  | 1  | HE3  | N   |
| ALA104 | Heavy | ARG5 | 6.57 | 0.03  | 0  | 1  | H    | O   |
| ALA104 | Heavy | PHE4 | 6.63 | 0.09  | 0  | 0  | C    | HB2 |
| ILE102 | Heavy | ASP7 | 6.82 | -0.08 | 0  | -2 | HG21 | H   |
| TYR110 | Heavy | HIS6 | 6.90 | -0.08 | 0  | 0  | H    | HE2 |
| GLY107 | Heavy | ASP7 | 7.18 | 0.02  | 0  | -2 | H    | H   |
| ILE102 | Heavy | ARG5 | 7.38 | -0.18 | 0  | 1  | O    | O   |
| HIS35  | Heavy | HIS6 | 7.48 | 0.00  | 0  | 0  | HE2  | HE2 |
| GLY103 | Heavy | PHE4 | 7.50 | 0.01  | 0  | 0  | HA3  | HB2 |
| ARG106 | Heavy | ARG5 | 7.52 | 0.57  | 1  | 1  | N    | H   |
| TRP52  | Heavy | GLU3 | 7.52 | -0.14 | 0  | -1 | HZ2  | C   |
| THR56  | Heavy | GLU3 | 7.54 | -0.07 | 0  | -1 | O    | OE1 |
| LYS58  | Heavy | PHE4 | 7.71 | -0.19 | 1  | 0  | H    | H   |
| TYR59  | Heavy | HIS6 | 7.81 | -0.04 | 0  | 0  | HE2  | H   |
| ARG106 | Heavy | ASP7 | 7.90 | -1.55 | 1  | -2 | H    | OD1 |
| VAL50  | Heavy | PHE4 | 7.97 | -0.02 | 0  | 0  | HG11 | O   |
| TYR32  | Light | ASP7 | 1.68 | -7.70 | 0  | -2 | HH   | OXT |
| TYR91  | Light | HIS6 | 2.38 | -1.72 | 0  | 0  | O    | HD2 |
| TYR32  | Light | HIS6 | 2.54 | -5.76 | 0  | 0  | CZ   | HB2 |
| TYR92  | Light | HIS6 | 3.09 | -0.50 | 0  | 0  | HA   | HB3 |
| TYR92  | Light | ARG5 | 3.35 | -0.84 | 0  | 1  | O    | HB3 |
| SER93  | Light | ARG5 | 3.66 | -0.55 | 0  | 1  | HA   | HB3 |
| SER30  | Light | ASP7 | 4.32 | -0.48 | 0  | -2 | HG   | OXT |
| SER93  | Light | HIS6 | 4.80 | -0.15 | 0  | 0  | HA   | H   |
| THR94  | Light | ARG5 | 4.84 | -0.33 | 0  | 1  | H    | HB2 |
| LEU96  | Light | HIS6 | 5.06 | -0.12 | 0  | 0  | HD22 | HD2 |
| TYR92  | Light | ASP7 | 5.11 | 0.24  | 0  | -2 | HE1  | O   |
| TYR91  | Light | ARG5 | 5.56 | -0.38 | 0  | 1  | O    | HB3 |
| THR94  | Light | PHE4 | 5.62 | -0.09 | 0  | 0  | H    | O   |
| SER30  | Light | HIS6 | 5.89 | -0.08 | 0  | 0  | HB3  | HB2 |
| SER93  | Light | PHE4 | 5.98 | -0.12 | 0  | 0  | HA   | O   |
| THR94  | Light | HIS6 | 6.12 | -0.08 | 0  | 0  | H    | H   |
| THR94  | Light | GLU3 | 6.53 | 0.02  | 0  | -1 | OG1  | HB2 |
| GLN90  | Light | HIS6 | 6.54 | -0.11 | 0  | 0  | C    | HD2 |
| SER31  | Light | ASP7 | 6.67 | -0.25 | 0  | -2 | H    | OXT |

|       |       |      |      |       |   |    |      |     |
|-------|-------|------|------|-------|---|----|------|-----|
| TYR32 | Light | ARG5 | 6.73 | -0.53 | 0 | 1  | HH   | O   |
| ILE29 | Light | HIS6 | 6.73 | -0.09 | 0 | 0  | O    | HB3 |
| TYR92 | Light | PHE4 | 6.86 | -0.05 | 0 | 0  | O    | O   |
| LEU96 | Light | ARG5 | 6.91 | -0.03 | 0 | 1  | HD21 | HA  |
| ILE29 | Light | ASP7 | 7.24 | 0.05  | 0 | -2 | O    | OXT |
| TYR91 | Light | ASP7 | 7.32 | 0.22  | 0 | -2 | O    | N   |
| SER31 | Light | HIS6 | 7.33 | -0.13 | 0 | 0  | H    | HB2 |
| LEU96 | Light | PHE4 | 7.44 | -0.02 | 0 | 0  | HD21 | O   |
| LEU33 | Light | HIS6 | 7.78 | -0.07 | 0 | 0  | N    | HD2 |
| SER28 | Light | ASP7 | 7.87 | 0.24  | 0 | -2 | O    | O   |

**Table S22** – Quantum biochemistry details of RC MD6-#1

| Adu Residue | Adu Chain | A $\beta$ Residue | Distance (Å) | Interaction Energy (kcal/mol) | Adu Residue Charge | A $\beta$ Residue Charge | Adu Atom | A $\beta$ Atom |
|-------------|-----------|-------------------|--------------|-------------------------------|--------------------|--------------------------|----------|----------------|
| ARG105      | Heavy     | ASP7              | 1.73         | -17.43                        | 1                  | -2                       | HH11     | OD2            |
| ARG105      | Heavy     | ARG5              | 1.76         | -2.42                         | 1                  | 1                        | HH12     | O              |
| PRO108      | Heavy     | HIS6              | 1.88         | -4.49                         | 0                  | 0                        | O        | HE2            |
| LYS57       | Heavy     | PHE4              | 2.31         | -2.45                         | 1                  | 0                        | HD2      | HZ             |
| ARG105      | Heavy     | PHE4              | 2.33         | -1.74                         | 1                  | 0                        | HG2      | HE2            |
| TRP52       | Heavy     | PHE4              | 2.40         | -2.25                         | 0                  | 0                        | HH2      | HE1            |
| ARG105      | Heavy     | HIS6              | 2.64         | -4.01                         | 1                  | 0                        | HH12     | HA             |
| GLY107      | Heavy     | HIS6              | 2.67         | -0.97                         | 0                  | 0                        | H        | HE1            |
| TYR59       | Heavy     | PHE4              | 2.78         | -1.60                         | 0                  | 0                        | HE2      | HE1            |
| ILE102      | Heavy     | HIS6              | 2.92         | -1.77                         | 0                  | 0                        | HG22     | HE2            |
| ALA104      | Heavy     | ASP7              | 3.22         | -1.31                         | 0                  | -2                       | HB2      | OD1            |
| GLY103      | Heavy     | HIS6              | 3.68         | -0.35                         | 0                  | 0                        | HA3      | ND1            |
| TYR109      | Heavy     | HIS6              | 4.08         | -1.51                         | 0                  | 0                        | HA       | HE2            |
| TRP52       | Heavy     | HIS6              | 4.15         | -0.39                         | 0                  | 0                        | HZ2      | HE1            |
| ARG106      | Heavy     | HIS6              | 4.50         | 0.26                          | 1                  | 0                        | C        | HE1            |
| ALA104      | Heavy     | HIS6              | 4.50         | -0.46                         | 0                  | 0                        | H        | HA             |
| GLY103      | Heavy     | ASP7              | 4.71         | -0.65                         | 0                  | -2                       | HA3      | H              |
| GLY107      | Heavy     | PHE4              | 5.04         | -0.10                         | 0                  | 0                        | HA3      | HE1            |
| GLY101      | Heavy     | HIS6              | 5.06         | -0.30                         | 0                  | 0                        | HA2      | HE1            |
| PRO108      | Heavy     | PHE4              | 5.15         | -0.11                         | 0                  | 0                        | HD3      | HE1            |
| TRP52       | Heavy     | ARG5              | 5.49         | -0.12                         | 0                  | 1                        | HH2      | HA             |
| ARG105      | Heavy     | GLU3              | 6.05         | -0.92                         | 1                  | -1                       | HH12     | O              |
| ARG106      | Heavy     | PHE4              | 6.34         | -0.10                         | 1                  | 0                        | N        | HZ             |
| PRO108      | Heavy     | ARG5              | 6.45         | -0.31                         | 0                  | 1                        | HD3      | HA             |
| ALA104      | Heavy     | ARG5              | 6.49         | -0.14                         | 0                  | 1                        | H        | O              |
| ASP99       | Heavy     | HIS6              | 6.49         | -0.24                         | -1                 | 0                        | OD1      | HE2            |
| TYR59       | Heavy     | GLU3              | 6.49         | -0.18                         | 0                  | -1                       | HH       | HB3            |
| ILE102      | Heavy     | ASP7              | 6.52         | -0.18                         | 0                  | -2                       | HG23     | H              |
| TYR59       | Heavy     | ARG5              | 6.66         | -0.09                         | 0                  | 1                        | HH       | N              |
| VAL50       | Heavy     | PHE4              | 6.73         | -0.03                         | 0                  | 0                        | HG11     | HE1            |
| GLY107      | Heavy     | ARG5              | 6.80         | -0.05                         | 0                  | 1                        | HA3      | HA             |
| GLY103      | Heavy     | ARG5              | 6.84         | 0.02                          | 0                  | 1                        | HA3      | C              |



|        |       |      |      |       |   |    |      |      |
|--------|-------|------|------|-------|---|----|------|------|
| TYR110 | Heavy | HIS6 | 7.00 | -0.09 | 0 | 0  | N    | HE2  |
| LYS57  | Heavy | ARG5 | 7.06 | 0.59  | 1 | 1  | HE2  | H    |
| ALA104 | Heavy | PHE4 | 7.19 | 0.04  | 0 | 0  | C    | HZ   |
| PHE53  | Heavy | PHE4 | 7.29 | -0.04 | 0 | 0  | HE1  | HZ   |
| ARG106 | Heavy | ASP7 | 7.40 | -1.36 | 1 | -2 | H    | H    |
| LYS58  | Heavy | PHE4 | 7.40 | -0.10 | 1 | 0  | N    | HE1  |
| THR56  | Heavy | PHE4 | 7.47 | -0.07 | 0 | 0  | OG1  | HZ   |
| HIS35  | Heavy | HIS6 | 7.58 | 0.00  | 0 | 0  | HE2  | HE2  |
| GLY107 | Heavy | ASP7 | 7.97 | 0.07  | 0 | -2 | H    | H    |
| ARG100 | Heavy | HIS6 | 7.98 | 0.02  | 1 | 0  | C    | HE1  |
| TYR32  | Light | ASP7 | 1.61 | -7.00 | 0 | -2 | HH   | O    |
| SER93  | Light | GLU3 | 2.06 | -7.62 | 0 | -1 | HG   | OE1  |
| TYR92  | Light | HIS6 | 2.44 | -1.06 | 0 | 0  | HE1  | O    |
| TYR32  | Light | HIS6 | 2.61 | -5.76 | 0 | 0  | HD2  | HD2  |
| TYR92  | Light | ARG5 | 2.71 | -6.39 | 0 | 1  | O    | HB3  |
| THR94  | Light | GLU3 | 2.81 | -1.24 | 0 | -1 | H    | OE1  |
| TYR91  | Light | HIS6 | 3.13 | -0.76 | 0 | 0  | HB2  | HE2  |
| TYR92  | Light | ASP7 | 3.35 | 0.36  | 0 | -2 | HE1  | O    |
| SER93  | Light | ARG5 | 3.55 | -0.17 | 0 | 1  | HA   | HB2  |
| THR94  | Light | PHE4 | 4.16 | -0.58 | 0 | 0  | HG1  | O    |
| ASP1   | Light | GLU3 | 4.23 | 1.29  | 0 | -1 | OD1  | OE2  |
| TYR92  | Light | GLU3 | 4.42 | -0.37 | 0 | -1 | O    | OE1  |
| SER93  | Light | PHE4 | 4.44 | -0.61 | 0 | 0  | HA   | O    |
| TYR91  | Light | ARG5 | 4.54 | -0.43 | 0 | 1  | O    | HB3  |
| THR94  | Light | ARG5 | 4.68 | -0.38 | 0 | 1  | HG1  | HA   |
| TYR92  | Light | PHE4 | 4.71 | -0.40 | 0 | 0  | O    | O    |
| ILE2   | Light | ARG5 | 4.99 | -0.05 | 0 | 1  | HD12 | HH22 |
| SER30  | Light | ASP7 | 5.25 | -0.53 | 0 | -2 | HG   | O    |
| TYR32  | Light | ARG5 | 5.40 | -0.51 | 0 | 1  | HE1  | HG3  |
| ILE2   | Light | GLU3 | 5.46 | -0.15 | 0 | -1 | HG13 | OE1  |
| SER28  | Light | ARG5 | 5.69 | -0.27 | 0 | 1  | O    | HH21 |
| PRO95  | Light | GLU3 | 5.84 | 0.52  | 0 | -1 | HD3  | OE1  |
| LEU96  | Light | HIS6 | 5.89 | -0.08 | 0 | 0  | HD21 | HE2  |
| SER93  | Light | HIS6 | 6.01 | -0.05 | 0 | 0  | N    | H    |
| SER30  | Light | HIS6 | 6.10 | -0.04 | 0 | 0  | HB3  | HB3  |
| GLN27  | Light | ARG5 | 6.20 | 0.15  | 0 | 1  | HB3  | HH21 |
| ILE29  | Light | ARG5 | 6.27 | -0.18 | 0 | 1  | HA   | HD2  |
| TYR92  | Light | ALA2 | 6.27 | -0.26 | 0 | 1  | HH   | HB1  |
| THR94  | Light | HIS6 | 6.41 | -0.07 | 0 | 0  | HG1  | H    |
| GLN27  | Light | GLU3 | 6.49 | -0.23 | 0 | -1 | HE22 | OE2  |
| SER31  | Light | HIS6 | 6.51 | -0.09 | 0 | 0  | C    | HD2  |
| ILE29  | Light | HIS6 | 6.52 | -0.10 | 0 | 0  | O    | HD2  |
| ASP1   | Light | ARG5 | 6.55 | -0.31 | 0 | 1  | OD1  | HH22 |
| GLN90  | Light | GLU3 | 6.62 | 0.02  | 0 | -1 | HE22 | OE1  |
| LEU33  | Light | HIS6 | 6.62 | -0.10 | 0 | 0  | N    | HD2  |
| SER31  | Light | ASP7 | 6.70 | -0.34 | 0 | -2 | H    | O    |
| LEU96  | Light | ARG5 | 6.87 | -0.03 | 0 | 1  | HD23 | HA   |
| TYR91  | Light | PHE4 | 6.93 | -0.08 | 0 | 0  | O    | O    |

|       |       |      |      |       |   |    |      |     |
|-------|-------|------|------|-------|---|----|------|-----|
| ILE29 | Light | ASP7 | 7.03 | 0.08  | 0 | -2 | O    | O   |
| LEU96 | Light | PHE4 | 7.11 | -0.05 | 0 | 0  | HD23 | HD1 |
| LEU96 | Light | GLU3 | 7.39 | -0.02 | 0 | -1 | HD23 | OE1 |
| GLN90 | Light | ARG5 | 7.39 | -0.14 | 0 | 1  | OE1  | HB3 |
| GLN90 | Light | HIS6 | 7.45 | -0.06 | 0 | 0  | C    | HD2 |
| SER30 | Light | ARG5 | 7.61 | -0.01 | 0 | 1  | HB2  | HD2 |
| SER93 | Light | ALA2 | 7.76 | 0.03  | 0 | 1  | HG   | C   |
| ALA50 | Light | HIS6 | 7.79 | -0.01 | 0 | 0  | HA   | HD2 |
| GLN27 | Light | ALA2 | 7.86 | 0.13  | 0 | 1  | HE21 | HA  |
| ASP1  | Light | ALA2 | 7.89 | -0.36 | 0 | 1  | OD1  | HA  |

**Table S23** – Quantum biochemistry details of RC MD6-#2

| Adu Residue | Adu Chain | A $\beta$ Residue | Distance (Å) | Interaction Energy (kcal/mol) | Adu Residue Charge | A $\beta$ Residue Charge | Adu Atom | A $\beta$ Atom |
|-------------|-----------|-------------------|--------------|-------------------------------|--------------------|--------------------------|----------|----------------|
| PRO108      | Heavy     | HIS6              | 1.81         | -5.37                         | 0                  | 0                        | O        | HE2            |
| ARG105      | Heavy     | ASP7              | 1.94         | -15.44                        | 1                  | -2                       | HH21     | OD2            |
| ARG105      | Heavy     | ARG5              | 2.11         | -2.11                         | 1                  | 1                        | HH12     | O              |
| ARG105      | Heavy     | PHE4              | 2.18         | -1.94                         | 1                  | 0                        | HD2      | HZ             |
| LYS57       | Heavy     | PHE4              | 2.21         | -1.76                         | 1                  | 0                        | HE2      | HZ             |
| ILE102      | Heavy     | HIS6              | 2.28         | -1.45                         | 0                  | 0                        | HG22     | HE1            |
| GLY107      | Heavy     | HIS6              | 2.57         | -2.18                         | 0                  | 0                        | O        | HE1            |
| ARG105      | Heavy     | HIS6              | 2.76         | -3.23                         | 1                  | 0                        | HH12     | HA             |
| TYR59       | Heavy     | PHE4              | 2.85         | -2.22                         | 0                  | 0                        | HE2      | HE2            |
| TRP52       | Heavy     | PHE4              | 3.01         | -2.21                         | 0                  | 0                        | HH2      | HE2            |
| TYR109      | Heavy     | HIS6              | 3.78         | -1.87                         | 0                  | 0                        | HA       | HE2            |
| ARG106      | Heavy     | HIS6              | 4.26         | -0.17                         | 1                  | 0                        | C        | HE1            |
| TRP52       | Heavy     | ARG5              | 4.51         | -0.20                         | 0                  | 1                        | HH2      | HA             |
| GLY103      | Heavy     | HIS6              | 4.84         | -0.23                         | 0                  | 0                        | N        | HE1            |
| GLY101      | Heavy     | HIS6              | 4.89         | -0.05                         | 0                  | 0                        | HA2      | HE1            |
| ALA104      | Heavy     | ASP7              | 4.97         | -0.92                         | 0                  | -2                       | HB1      | OD2            |
| GLY103      | Heavy     | ASP7              | 5.48         | -0.47                         | 0                  | -2                       | HA3      | HB3            |
| TRP52       | Heavy     | HIS6              | 5.50         | -0.37                         | 0                  | 0                        | HH2      | H              |
| GLY107      | Heavy     | ARG5              | 5.94         | -0.05                         | 0                  | 1                        | HA3      | HA             |
| GLY107      | Heavy     | PHE4              | 5.96         | -0.11                         | 0                  | 0                        | HA3      | HE2            |
| PRO108      | Heavy     | ARG5              | 5.98         | -0.35                         | 0                  | 1                        | HD3      | HA             |
| ILE102      | Heavy     | ASP7              | 6.32         | -0.09                         | 0                  | -2                       | HG22     | H              |
| ASP99       | Heavy     | HIS6              | 6.38         | -0.24                         | -1                 | 0                        | OD1      | HE2            |
| PRO108      | Heavy     | PHE4              | 6.43         | -0.08                         | 0                  | 0                        | HD2      | HE2            |
| TYR59       | Heavy     | ARG5              | 6.63         | -0.13                         | 0                  | 1                        | HE2      | HA             |
| ARG106      | Heavy     | PHE4              | 6.68         | -0.09                         | 1                  | 0                        | N        | HZ             |
| ALA104      | Heavy     | HIS6              | 6.72         | -0.12                         | 0                  | 0                        | N        | HE1            |
| GLY107      | Heavy     | ASP7              | 6.74         | -0.01                         | 0                  | -2                       | H        | H              |
| TYR110      | Heavy     | HIS6              | 6.87         | -0.13                         | 0                  | 0                        | N        | HE2            |
| THR56       | Heavy     | PHE4              | 6.95         | -0.12                         | 0                  | 0                        | OG1      | HZ             |
| ASP54       | Heavy     | PHE4              | 7.02         | -0.04                         | -1                 | 0                        | OD2      | HZ             |
| ARG106      | Heavy     | ASP7              | 7.06         | -1.56                         | 1                  | -2                       | H        | OD2            |

|        |       |      |      |       |   |    |      |     |
|--------|-------|------|------|-------|---|----|------|-----|
| LYS58  | Heavy | PHE4 | 7.20 | -0.12 | 1 | 0  | H    | HE2 |
| HIS35  | Heavy | HIS6 | 7.23 | 0.00  | 0 | 0  | HE1  | HE2 |
| ALA104 | Heavy | PHE4 | 7.34 | 0.06  | 0 | 0  | C    | HZ  |
| VAL50  | Heavy | PHE4 | 7.36 | -0.03 | 0 | 0  | HG13 | HE2 |
| ARG105 | Heavy | GLU3 | 7.39 | -0.88 | 1 | -1 | HH12 | O   |
| TYR59  | Heavy | ALA2 | 7.46 | -0.02 | 0 | 1  | HH   | O   |
| ARG100 | Heavy | HIS6 | 7.52 | 0.05  | 1 | 0  | HH22 | HE1 |
| PHE53  | Heavy | HIS6 | 7.65 | -0.05 | 0 | 0  | HB2  | HE1 |
| TYR59  | Heavy | GLU3 | 7.67 | -0.11 | 0 | -1 | HH   | C   |
| LYS57  | Heavy | ARG5 | 7.69 | 0.63  | 1 | 1  | HE2  | N   |
| TRP52  | Heavy | ASP7 | 7.82 | -0.05 | 0 | -2 | HZ2  | H   |
| SER93  | Light | GLU3 | 1.81 | -8.25 | 0 | -1 | HG   | OE1 |
| TYR32  | Light | ASP7 | 1.93 | -7.06 | 0 | -2 | HH   | OXT |
| TYR91  | Light | HIS6 | 2.31 | -1.68 | 0 | 0  | O    | HD2 |
| TYR32  | Light | HIS6 | 2.46 | -6.58 | 0 | 0  | HH   | HB2 |
| TYR92  | Light | ARG5 | 2.57 | -6.84 | 0 | 1  | O    | HB3 |
| TYR92  | Light | HIS6 | 2.69 | -1.55 | 0 | 0  | HD1  | HB3 |
| SER93  | Light | ARG5 | 3.41 | -0.78 | 0 | 1  | HA   | HB2 |
| THR94  | Light | GLU3 | 3.52 | -0.47 | 0 | -1 | H    | OE1 |
| TYR92  | Light | GLU3 | 3.89 | 0.24  | 0 | -1 | O    | OE2 |
| TYR92  | Light | ASP7 | 4.01 | -0.32 | 0 | -2 | HE1  | HA  |
| THR94  | Light | PHE4 | 4.04 | -0.37 | 0 | 0  | HG1  | O   |
| TYR91  | Light | ARG5 | 4.39 | -0.31 | 0 | 1  | O    | HB3 |
| SER30  | Light | ASP7 | 4.52 | -0.67 | 0 | -2 | HG   | OXT |
| SER93  | Light | PHE4 | 4.91 | -0.45 | 0 | 0  | HA   | O   |
| ILE2   | Light | GLU3 | 5.01 | -0.29 | 0 | -1 | HG13 | OE1 |
| ASP1   | Light | GLU3 | 5.09 | -0.68 | 0 | -1 | H2   | OE1 |
| SER30  | Light | HIS6 | 5.09 | -0.15 | 0 | 0  | HB3  | HB3 |
| THR94  | Light | ARG5 | 5.17 | -0.44 | 0 | 1  | H    | HB2 |
| TYR92  | Light | PHE4 | 5.54 | -0.62 | 0 | 0  | O    | O   |
| ILE29  | Light | ARG5 | 5.66 | -0.12 | 0 | 1  | HA   | HD2 |
| LEU96  | Light | HIS6 | 5.78 | -0.10 | 0 | 0  | HD21 | HD2 |
| SER28  | Light | ARG5 | 5.81 | -0.30 | 0 | 1  | O    | HD2 |
| ILE29  | Light | HIS6 | 5.86 | -0.16 | 0 | 0  | O    | HB3 |
| SER93  | Light | HIS6 | 5.93 | -0.09 | 0 | 0  | N    | H   |
| ILE2   | Light | ARG5 | 6.02 | -0.06 | 0 | 1  | HD12 | HD3 |
| TYR32  | Light | ARG5 | 6.09 | -0.53 | 0 | 1  | HD1  | HB3 |
| SER31  | Light | HIS6 | 6.14 | -0.23 | 0 | 0  | H    | HB3 |
| SER31  | Light | ASP7 | 6.16 | -0.32 | 0 | -2 | H    | OXT |
| LEU96  | Light | ARG5 | 6.18 | -0.06 | 0 | 1  | HD23 | HA  |
| LEU96  | Light | PHE4 | 6.40 | -0.06 | 0 | 0  | HD23 | O   |
| SER30  | Light | ARG5 | 6.54 | -0.01 | 0 | 1  | HB3  | HD2 |
| GLN90  | Light | GLU3 | 6.57 | -0.02 | 0 | -1 | HE22 | OE1 |
| GLN90  | Light | ARG5 | 6.62 | -0.12 | 0 | 1  | OE1  | HB3 |
| GLN90  | Light | HIS6 | 6.62 | -0.09 | 0 | 0  | C    | HD2 |
| GLN27  | Light | GLU3 | 6.67 | -0.10 | 0 | -1 | HB2  | OE2 |
| TYR91  | Light | PHE4 | 6.75 | -0.04 | 0 | 0  | O    | O   |
| PRO95  | Light | GLU3 | 6.98 | 0.26  | 0 | -1 | N    | OE1 |

|       |       |      |      |       |   |    |      |     |
|-------|-------|------|------|-------|---|----|------|-----|
| SER28 | Light | GLU3 | 7.04 | 0.23  | 0 | -1 | O    | OE2 |
| LEU33 | Light | HIS6 | 7.15 | -0.08 | 0 | 0  | N    | HD2 |
| THR94 | Light | ALA2 | 7.27 | -0.09 | 0 | 1  | HB   | O   |
| GLN27 | Light | ARG5 | 7.44 | -0.03 | 0 | 1  | HB2  | HD3 |
| ASN34 | Light | HIS6 | 7.56 | -0.03 | 0 | 0  | HD22 | HE2 |
| LEU96 | Light | GLU3 | 7.61 | -0.03 | 0 | -1 | HD22 | HG3 |
| TYR91 | Light | ASP7 | 7.63 | 0.21  | 0 | -2 | O    | N   |
| THR94 | Light | HIS6 | 7.66 | -0.03 | 0 | 0  | OG1  | H   |
| ILE29 | Light | GLU3 | 7.77 | -0.01 | 0 | -1 | HG22 | OE2 |
| ILE29 | Light | ASP7 | 7.82 | -0.04 | 0 | -2 | O    | OXT |

**Table S24** – Quantum biochemistry details of RC MD6-#3

| Adu Residue | Adu Chain | A $\beta$ Residue | Distance (Å) | Interaction Energy (kcal/mol) | Adu Residue Charge | A $\beta$ Residue Charge | Adu Atom | A $\beta$ Atom |
|-------------|-----------|-------------------|--------------|-------------------------------|--------------------|--------------------------|----------|----------------|
| TYR59       | Heavy     | GLU3              | 1.63         | -13.48                        | 0                  | -1                       | HH       | OE2            |
| PRO108      | Heavy     | HIS6              | 1.91         | -4.92                         | 0                  | 0                        | O        | HE2            |
| LYS57       | Heavy     | GLU3              | 1.95         | -11.90                        | 1                  | -1                       | HZ1      | OE1            |
| TYR59       | Heavy     | PHE4              | 2.15         | -3.62                         | 0                  | 0                        | OH       | H              |
| GLY107      | Heavy     | HIS6              | 2.19         | -1.54                         | 0                  | 0                        | O        | HE1            |
| ARG105      | Heavy     | PHE4              | 2.36         | -6.07                         | 1                  | 0                        | HB2      | HB2            |
| LYS57       | Heavy     | PHE4              | 2.43         | -3.85                         | 1                  | 0                        | HG3      | HD2            |
| ILE102      | Heavy     | HIS6              | 2.47         | -1.24                         | 0                  | 0                        | HG22     | HE1            |
| TRP52       | Heavy     | PHE4              | 2.73         | -4.36                         | 0                  | 0                        | HZ2      | HD2            |
| ARG105      | Heavy     | ARG5              | 2.76         | -0.08                         | 1                  | 1                        | HG3      | H              |
| LYS57       | Heavy     | ALA2              | 2.82         | 0.40                          | 1                  | 1                        | HE3      | O              |
| ARG105      | Heavy     | ALA2              | 3.45         | 0.79                          | 1                  | 1                        | HH11     | HB3            |
| THR56       | Heavy     | PHE4              | 3.68         | -0.51                         | 0                  | 0                        | OG1      | HE2            |
| ARG106      | Heavy     | HIS6              | 3.69         | -0.85                         | 1                  | 0                        | C        | HE1            |
| ALA104      | Heavy     | ASP7              | 3.71         | 0.09                          | 0                  | -2                       | H        | OD2            |
| TYR109      | Heavy     | HIS6              | 3.83         | -1.82                         | 0                  | 0                        | HA       | HE2            |
| ARG105      | Heavy     | HIS6              | 3.92         | -0.81                         | 1                  | 0                        | HB3      | HA             |
| ARG105      | Heavy     | ASP7              | 3.99         | -3.28                         | 1                  | -2                       | HG2      | OD1            |
| GLY103      | Heavy     | HIS6              | 4.02         | -0.13                         | 0                  | 0                        | HA3      | HE1            |
| TYR59       | Heavy     | ALA2              | 4.60         | -0.42                         | 0                  | 1                        | HH       | O              |
| GLY101      | Heavy     | HIS6              | 4.61         | -0.08                         | 0                  | 0                        | HA2      | HE1            |
| GLY103      | Heavy     | ASP7              | 4.70         | -0.63                         | 0                  | -2                       | HA2      | OD2            |
| TRP52       | Heavy     | ARG5              | 4.86         | -0.22                         | 0                  | 1                        | HH2      | HA             |
| GLY107      | Heavy     | PHE4              | 4.95         | -0.26                         | 0                  | 0                        | H        | HB2            |
| ILE102      | Heavy     | ASP7              | 5.41         | -0.23                         | 0                  | -2                       | HG23     | H              |
| ASP54       | Heavy     | PHE4              | 5.42         | -0.19                         | -1                 | 0                        | OD2      | HE2            |
| GLY107      | Heavy     | ARG5              | 5.44         | -0.13                         | 0                  | 1                        | HA3      | HA             |
| TRP52       | Heavy     | HIS6              | 5.51         | -0.26                         | 0                  | 0                        | HZ2      | HE1            |
| ARG105      | Heavy     | GLU3              | 5.58         | -1.42                         | 1                  | -1                       | HG3      | O              |
| PRO108      | Heavy     | ARG5              | 5.79         | -0.25                         | 0                  | 1                        | HD3      | HA             |
| ARG106      | Heavy     | PHE4              | 5.82         | -0.02                         | 1                  | 0                        | N        | HB2            |
| LYS58       | Heavy     | GLU3              | 5.83         | -1.07                         | 1                  | -1                       | O        | OE2            |

|        |       |      |      |       |    |    |      |      |
|--------|-------|------|------|-------|----|----|------|------|
| TYR59  | Heavy | ARG5 | 6.30 | -0.07 | 0  | 1  | HE2  | N    |
| PRO108 | Heavy | PHE4 | 6.33 | -0.13 | 0  | 0  | HD2  | HB3  |
| ALA104 | Heavy | HIS6 | 6.40 | -0.17 | 0  | 0  | N    | HE1  |
| ALA104 | Heavy | PHE4 | 6.40 | -0.04 | 0  | 0  | O    | HZ   |
| GLY107 | Heavy | ASP7 | 6.56 | 0.07  | 0  | -2 | H    | H    |
| TRP52  | Heavy | GLU3 | 6.79 | -0.19 | 0  | -1 | HZ2  | C    |
| ASP99  | Heavy | HIS6 | 6.80 | -0.18 | -1 | 0  | OD1  | HE2  |
| TYR110 | Heavy | HIS6 | 6.90 | -0.07 | 0  | 0  | N    | HE2  |
| ALA104 | Heavy | ARG5 | 6.97 | -0.03 | 0  | 1  | HB3  | O    |
| GLY103 | Heavy | ARG5 | 7.02 | -0.03 | 0  | 1  | HA3  | O    |
| ARG106 | Heavy | ASP7 | 7.07 | -1.62 | 1  | -2 | H    | OD1  |
| LYS58  | Heavy | PHE4 | 7.18 | -0.23 | 1  | 0  | N    | HD2  |
| PHE53  | Heavy | PHE4 | 7.18 | -0.08 | 0  | 0  | HB2  | HE2  |
| ARG106 | Heavy | ARG5 | 7.20 | 0.45  | 1  | 1  | H    | O    |
| VAL50  | Heavy | PHE4 | 7.30 | -0.03 | 0  | 0  | HG12 | HD2  |
| LYS57  | Heavy | ARG5 | 7.31 | 0.75  | 1  | 1  | HG3  | N    |
| ARG100 | Heavy | HIS6 | 7.37 | 0.03  | 1  | 0  | O    | HE1  |
| LYS65  | Heavy | GLU3 | 7.46 | -1.10 | 1  | -1 | HZ3  | HG3  |
| HIS35  | Heavy | HIS6 | 7.76 | -0.01 | 0  | 0  | HE1  | HE2  |
| ILE102 | Heavy | ARG5 | 7.88 | -0.04 | 0  | 1  | O    | O    |
| GLY55  | Heavy | PHE4 | 7.92 | -0.01 | 0  | 0  | C    | HE2  |
| ILE102 | Heavy | PHE4 | 7.92 | -0.03 | 0  | 0  | O    | HB2  |
| TYR60  | Heavy | GLU3 | 7.97 | 0.05  | 0  | -1 | H    | OE2  |
| TYR32  | Light | ASP7 | 1.96 | -9.41 | 0  | -2 | HH   | O    |
| TYR92  | Light | HIS6 | 2.27 | -5.08 | 0  | 0  | O    | H    |
| TYR32  | Light | HIS6 | 2.50 | -5.10 | 0  | 0  | HB2  | HD2  |
| TYR91  | Light | HIS6 | 2.83 | -1.67 | 0  | 0  | O    | HD2  |
| TYR92  | Light | ARG5 | 2.96 | -3.82 | 0  | 1  | O    | HB3  |
| SER93  | Light | ARG5 | 3.08 | -2.06 | 0  | 1  | HG   | HB2  |
| TYR92  | Light | ASP7 | 3.13 | 0.31  | 0  | -2 | HE1  | OXT  |
| THR94  | Light | PHE4 | 3.39 | -0.34 | 0  | 0  | HG23 | O    |
| SER93  | Light | HIS6 | 3.72 | -1.27 | 0  | 0  | HA   | H    |
| THR94  | Light | ARG5 | 4.36 | -0.59 | 0  | 1  | H    | HA   |
| SER30  | Light | ASP7 | 4.49 | -0.39 | 0  | -2 | HB2  | O    |
| SER93  | Light | PHE4 | 4.55 | -0.34 | 0  | 0  | HA   | O    |
| SER30  | Light | HIS6 | 5.37 | -0.15 | 0  | 0  | HB3  | HB2  |
| TYR91  | Light | ARG5 | 5.38 | -0.28 | 0  | 1  | O    | HA   |
| THR94  | Light | HIS6 | 5.46 | -0.15 | 0  | 0  | H    | H    |
| TYR92  | Light | PHE4 | 5.65 | -0.22 | 0  | 0  | O    | O    |
| THR94  | Light | GLU3 | 5.66 | -0.06 | 0  | -1 | HG22 | HB2  |
| LEU96  | Light | HIS6 | 6.20 | -0.10 | 0  | 0  | HD22 | HD2  |
| GLN90  | Light | HIS6 | 6.21 | -0.08 | 0  | 0  | C    | HD2  |
| ILE29  | Light | HIS6 | 6.22 | -0.16 | 0  | 0  | O    | HB3  |
| GLN27  | Light | ARG5 | 6.37 | 0.04  | 0  | 1  | HE22 | HH21 |
| LEU33  | Light | HIS6 | 6.37 | -0.13 | 0  | 0  | N    | HD2  |
| SER31  | Light | ASP7 | 6.58 | -0.27 | 0  | -2 | H    | O    |
| ILE2   | Light | ARG5 | 6.65 | -0.06 | 0  | 1  | HD13 | HB3  |
| SER31  | Light | HIS6 | 6.70 | -0.10 | 0  | 0  | C    | HD2  |

|       |       |      |      |       |   |    |      |      |
|-------|-------|------|------|-------|---|----|------|------|
| LEU96 | Light | ARG5 | 6.74 | -0.03 | 0 | 1  | HD21 | HA   |
| ASP1  | Light | ARG5 | 6.75 | 0.19  | 0 | 1  | H2   | HH11 |
| SER93 | Light | GLU3 | 6.88 | -0.10 | 0 | -1 | HG   | O    |
| TYR32 | Light | ARG5 | 6.96 | -0.33 | 0 | 1  | HH   | O    |
| TYR91 | Light | PHE4 | 7.00 | -0.04 | 0 | 0  | O    | O    |
| LEU96 | Light | PHE4 | 7.05 | -0.03 | 0 | 0  | HD21 | O    |
| ILE2  | Light | HIS6 | 7.14 | -0.04 | 0 | 0  | HD12 | HB3  |
| ILE29 | Light | ASP7 | 7.21 | -0.12 | 0 | -2 | O    | O    |
| TYR91 | Light | ASP7 | 7.45 | 0.12  | 0 | -2 | O    | N    |

**Table S25** – Quantum biochemistry details of RC MD6-#4

| <b>Adu Residue</b> | <b>Adu Chain</b> | <b>A<math>\beta</math> Residue</b> | <b>Distance (Å)</b> | <b>Interaction Energy (kcal/mol)</b> | <b>Adu Residue Charge</b> | <b>A<math>\beta</math> Residue Charge</b> | <b>Adu Atom</b> | <b>A<math>\beta</math> Atom</b> |
|--------------------|------------------|------------------------------------|---------------------|--------------------------------------|---------------------------|-------------------------------------------|-----------------|---------------------------------|
| PRO108             | Heavy            | HIS6                               | 1.73                | -3.62                                | 0                         | 0                                         | O               | HE2                             |
| ARG105             | Heavy            | ASP7                               | 1.94                | -15.85                               | 1                         | -2                                        | HE              | OD1                             |
| GLY107             | Heavy            | HIS6                               | 2.42                | -1.45                                | 0                         | 0                                         | O               | HE1                             |
| TYR59              | Heavy            | ALA2                               | 2.43                | -0.59                                | 0                         | 1                                         | HE1             | HB2                             |
| TYR59              | Heavy            | PHE4                               | 2.45                | -4.46                                | 0                         | 0                                         | CE2             | HB3                             |
| ILE102             | Heavy            | HIS6                               | 2.45                | -1.77                                | 0                         | 0                                         | HG22            | HE1                             |
| ARG105             | Heavy            | ARG5                               | 2.63                | 0.08                                 | 1                         | 1                                         | HH11            | O                               |
| GLY107             | Heavy            | PHE4                               | 2.73                | -1.29                                | 0                         | 0                                         | HA3             | CZ                              |
| ARG105             | Heavy            | PHE4                               | 2.74                | -2.85                                | 1                         | 0                                         | HD2             | HE2                             |
| TRP52              | Heavy            | PHE4                               | 2.81                | -3.48                                | 0                         | 0                                         | HH2             | CD2                             |
| PRO108             | Heavy            | PHE4                               | 3.00                | -1.97                                | 0                         | 0                                         | HD3             | HD1                             |
| TYR59              | Heavy            | GLU3                               | 3.08                | -2.66                                | 0                         | -1                                        | HD1             | HA                              |
| TYR109             | Heavy            | HIS6                               | 3.48                | -2.28                                | 0                         | 0                                         | HA              | HE2                             |
| LYS57              | Heavy            | PHE4                               | 3.62                | -0.57                                | 1                         | 0                                         | HD3             | HD2                             |
| GLY103             | Heavy            | ASP7                               | 3.64                | -1.05                                | 0                         | -2                                        | HA3             | HB3                             |
| ALA104             | Heavy            | ASP7                               | 3.93                | -1.10                                | 0                         | -2                                        | H               | HB3                             |
| ARG105             | Heavy            | HIS6                               | 4.07                | -0.64                                | 1                         | 0                                         | HH12            | HA                              |
| LYS65              | Heavy            | ALA2                               | 4.23                | 1.25                                 | 1                         | 1                                         | HZ2             | O                               |
| LYS65              | Heavy            | GLU3                               | 4.35                | -1.82                                | 1                         | -1                                        | HZ2             | HG2                             |
| ARG106             | Heavy            | PHE4                               | 4.52                | -0.08                                | 1                         | 0                                         | N               | HZ                              |
| ARG105             | Heavy            | GLU3                               | 4.55                | -0.92                                | 1                         | -1                                        | HH21            | O                               |
| ARG106             | Heavy            | HIS6                               | 4.56                | -0.25                                | 1                         | 0                                         | C               | HE1                             |
| GLY103             | Heavy            | HIS6                               | 4.66                | -0.23                                | 0                         | 0                                         | HA3             | HE1                             |
| ILE102             | Heavy            | PHE4                               | 4.68                | -0.26                                | 0                         | 0                                         | O               | HZ                              |
| GLY103             | Heavy            | PHE4                               | 4.75                | -0.11                                | 0                         | 0                                         | HA3             | HZ                              |
| GLY101             | Heavy            | HIS6                               | 4.79                | -0.06                                | 0                         | 0                                         | HA2             | HE1                             |
| VAL50              | Heavy            | PHE4                               | 5.16                | -0.22                                | 0                         | 0                                         | HG13            | HB2                             |
| ASP62              | Heavy            | GLU3                               | 5.34                | 1.56                                 | -1                        | -1                                        | OD1             | HG2                             |
| LYS58              | Heavy            | ALA2                               | 5.41                | 0.61                                 | 1                         | 1                                         | O               | H                               |
| ILE102             | Heavy            | ASP7                               | 5.56                | -0.26                                | 0                         | -2                                        | HG23            | H                               |
| TYR59              | Heavy            | ARG5                               | 5.59                | -0.20                                | 0                         | 1                                         | HH              | H                               |
| TYR60              | Heavy            | ALA2                               | 5.67                | -0.27                                | 0                         | 1                                         | H               | O                               |
| ARG106             | Heavy            | ASP7                               | 5.68                | -1.71                                | 1                         | -2                                        | H               | OD1                             |

|        |       |      |      |        |    |    |      |      |
|--------|-------|------|------|--------|----|----|------|------|
| TRP47  | Heavy | PHE4 | 5.75 | -0.11  | 0  | 0  | HH2  | HB2  |
| TYR60  | Heavy | GLU3 | 5.80 | 0.00   | 0  | -1 | O    | HG2  |
| GLY107 | Heavy | ASP7 | 5.96 | -0.04  | 0  | -2 | H    | H    |
| TRP52  | Heavy | HIS6 | 6.01 | -0.12  | 0  | 0  | HZ2  | HE1  |
| PRO108 | Heavy | ARG5 | 6.10 | -0.37  | 0  | 1  | HD3  | HA   |
| ALA104 | Heavy | PHE4 | 6.13 | 0.05   | 0  | 0  | H    | HZ   |
| LYS58  | Heavy | PHE4 | 6.24 | -0.19  | 1  | 0  | O    | HB3  |
| ARG105 | Heavy | ALA2 | 6.26 | 1.05   | 1  | 1  | HH21 | HB3  |
| GLY107 | Heavy | ARG5 | 6.42 | -0.20  | 0  | 1  | HA3  | O    |
| TRP52  | Heavy | ARG5 | 6.44 | -0.10  | 0  | 1  | HH2  | H    |
| TYR60  | Heavy | PHE4 | 6.47 | -0.10  | 0  | 0  | H    | H    |
| TYR110 | Heavy | HIS6 | 6.57 | -0.12  | 0  | 0  | N    | HE2  |
| TRP47  | Heavy | GLU3 | 6.58 | 0.00   | 0  | -1 | HH2  | HA   |
| LYS57  | Heavy | ALA2 | 6.62 | 1.16   | 1  | 1  | HE3  | HB2  |
| ASP62  | Heavy | ALA2 | 6.72 | -1.07  | -1 | 1  | OD1  | O    |
| ASP99  | Heavy | HIS6 | 6.74 | -0.19  | -1 | 0  | OD1  | HE2  |
| LYS58  | Heavy | GLU3 | 6.78 | -0.63  | 1  | -1 | O    | HA   |
| THR61  | Heavy | GLU3 | 7.02 | -0.05  | 0  | -1 | HA   | HG2  |
| PHE53  | Heavy | PHE4 | 7.04 | -0.08  | 0  | 0  | HE1  | HE2  |
| ALA104 | Heavy | HIS6 | 7.13 | -0.07  | 0  | 0  | N    | HE1  |
| TRP52  | Heavy | GLU3 | 7.14 | -0.04  | 0  | -1 | HH2  | C    |
| LYS65  | Heavy | PHE4 | 7.23 | -0.11  | 1  | 0  | HZ2  | H    |
| TYR109 | Heavy | PHE4 | 7.24 | -0.09  | 0  | 0  | N    | HE1  |
| GLY101 | Heavy | PHE4 | 7.25 | -0.02  | 0  | 0  | HA2  | HE1  |
| TRP52  | Heavy | ASP7 | 7.40 | -0.12  | 0  | -2 | HZ2  | OD1  |
| LYS57  | Heavy | GLU3 | 7.57 | -0.74  | 1  | -1 | HD3  | O    |
| TRP47  | Heavy | ALA2 | 7.69 | -0.10  | 0  | 1  | HH2  | O    |
| PRO108 | Heavy | ASP7 | 7.69 | 0.46   | 0  | -2 | HD3  | H    |
| HIS35  | Heavy | PHE4 | 7.70 | -0.03  | 0  | 0  | HE1  | HB2  |
| GLY103 | Heavy | ARG5 | 7.77 | -0.01  | 0  | 1  | HA3  | O    |
| VAL50  | Heavy | GLU3 | 7.79 | -0.01  | 0  | -1 | HG11 | HA   |
| HIS35  | Heavy | HIS6 | 7.89 | 0.02   | 0  | 0  | HE1  | HE2  |
| ARG100 | Heavy | HIS6 | 7.92 | 0.01   | 1  | 0  | C    | HE1  |
| LYS57  | Heavy | ARG5 | 7.94 | 0.56   | 1  | 1  | HD3  | H    |
| PRO108 | Heavy | GLU3 | 7.97 | -0.01  | 0  | -1 | HD3  | C    |
| TYR92  | Light | ARG5 | 1.89 | -11.46 | 0  | 1  | OH   | HH12 |
| TYR92  | Light | HIS6 | 2.04 | -5.19  | 0  | 0  | O    | H    |
| THR94  | Light | PHE4 | 2.08 | -6.24  | 0  | 0  | H    | O    |
| SER93  | Light | ARG5 | 2.21 | -4.69  | 0  | 1  | HA   | HA   |
| SER93  | Light | PHE4 | 2.54 | -4.35  | 0  | 0  | HA   | O    |
| TYR91  | Light | HIS6 | 2.86 | -0.42  | 0  | 0  | O    | HD2  |
| TYR32  | Light | HIS6 | 2.97 | -4.04  | 0  | 0  | CD2  | HD2  |
| THR94  | Light | GLU3 | 3.08 | -2.46  | 0  | -1 | HG1  | HA   |
| THR94  | Light | ARG5 | 3.52 | -1.56  | 0  | 1  | H    | HA   |
| PRO95  | Light | GLU3 | 3.65 | -0.29  | 0  | -1 | HD2  | HG2  |
| SER93  | Light | HIS6 | 3.69 | -1.73  | 0  | 0  | HA   | H    |
| TYR32  | Light | ASP7 | 3.87 | -0.13  | 0  | -2 | HH   | OXT  |
| TYR92  | Light | PHE4 | 4.35 | -1.57  | 0  | 0  | O    | HD1  |

|       |       |      |      |       |   |    |      |      |
|-------|-------|------|------|-------|---|----|------|------|
| SER93 | Light | GLU3 | 4.41 | 0.15  | 0 | -1 | HB2  | HB2  |
| THR94 | Light | ALA2 | 4.94 | -0.24 | 0 | 1  | HG1  | O    |
| TYR91 | Light | PHE4 | 5.24 | -0.21 | 0 | 0  | O    | HD1  |
| ILE2  | Light | ARG5 | 5.35 | -0.10 | 0 | 1  | HD11 | HG3  |
| LEU96 | Light | PHE4 | 5.39 | -0.18 | 0 | 0  | HD23 | HD1  |
| SER28 | Light | ARG5 | 5.43 | -0.38 | 0 | 1  | O    | HH12 |
| GLN27 | Light | ARG5 | 5.45 | -0.25 | 0 | 1  | OE1  | HH21 |
| THR94 | Light | HIS6 | 5.58 | -0.14 | 0 | 0  | H    | H    |
| ILE29 | Light | HIS6 | 5.70 | -0.18 | 0 | 0  | O    | HD2  |
| TYR91 | Light | ARG5 | 5.71 | 0.04  | 0 | 1  | O    | HA   |
| ASP1  | Light | GLU3 | 5.80 | -0.55 | 0 | -1 | H    | OE2  |
| TYR92 | Light | ASP7 | 5.88 | 0.30  | 0 | -2 | HE1  | OXT  |
| SER30 | Light | HIS6 | 5.94 | -0.09 | 0 | 0  | HB2  | HB3  |
| PRO95 | Light | PHE4 | 6.04 | 0.00  | 0 | 0  | N    | H    |
| ILE29 | Light | ARG5 | 6.07 | -0.15 | 0 | 1  | HA   | HH12 |
| SER30 | Light | ARG5 | 6.10 | -0.15 | 0 | 1  | OG   | HH12 |
| SER31 | Light | HIS6 | 6.28 | -0.20 | 0 | 0  | H    | HD2  |
| LEU96 | Light | HIS6 | 6.38 | -0.08 | 0 | 0  | HD21 | HE2  |
| LEU96 | Light | ARG5 | 6.63 | -0.05 | 0 | 1  | HD23 | HA   |
| GLN90 | Light | HIS6 | 6.70 | -0.12 | 0 | 0  | OE1  | HD2  |
| TYR32 | Light | PHE4 | 6.78 | -0.08 | 0 | 0  | HE2  | HE1  |
| PRO95 | Light | ALA2 | 6.78 | -0.14 | 0 | 1  | HD2  | O    |
| GLN90 | Light | ARG5 | 6.87 | -0.10 | 0 | 1  | OE1  | HG3  |
| ALA50 | Light | HIS6 | 6.89 | -0.02 | 0 | 0  | HB3  | HE2  |
| TYR32 | Light | ARG5 | 7.04 | -0.25 | 0 | 1  | HE1  | HG2  |
| ASP1  | Light | ARG5 | 7.21 | 0.36  | 0 | 1  | H2   | HD2  |
| GLN90 | Light | PHE4 | 7.22 | -0.04 | 0 | 0  | HE22 | O    |
| ASN34 | Light | HIS6 | 7.25 | -0.03 | 0 | 0  | HD22 | HE2  |
| ILE2  | Light | HIS6 | 7.32 | -0.04 | 0 | 0  | HD11 | H    |
| SER30 | Light | ASP7 | 7.45 | -0.01 | 0 | -2 | HB2  | OXT  |
| LEU33 | Light | HIS6 | 7.48 | -0.07 | 0 | 0  | N    | HD2  |
| PRO95 | Light | ARG5 | 7.48 | -0.16 | 0 | 1  | HD2  | HB3  |
| TYR92 | Light | GLU3 | 7.81 | -0.02 | 0 | -1 | O    | HB2  |
| ILE2  | Light | PHE4 | 7.81 | -0.02 | 0 | 0  | HD11 | O    |
| ILE2  | Light | GLU3 | 7.83 | -0.01 | 0 | -1 | HG13 | OE2  |
| SER93 | Light | ASP7 | 7.92 | 0.04  | 0 | -2 | HA   | N    |
| SER31 | Light | ASP7 | 7.93 | -0.10 | 0 | -2 | HG   | OXT  |
| TYR91 | Light | ASP7 | 7.99 | 0.16  | 0 | -2 | O    | H    |

**Table S26** – Quantum biochemistry details of RC MD6-#5

| Adu Residue | Adu Chain | A $\beta$ Residue | Distance (Å) | Interaction Energy (kcal/mol) | Adu Residue Charge | A $\beta$ Residue Charge | Adu Atom | A $\beta$ Atom |
|-------------|-----------|-------------------|--------------|-------------------------------|--------------------|--------------------------|----------|----------------|
| ARG105      | Heavy     | ASP7              | 1.67         | -16.58                        | 1                  | -2                       | HH11     | OD1            |
| PRO108      | Heavy     | HIS6              | 1.93         | -5.91                         | 0                  | 0                        | O        | HE2            |
| ARG105      | Heavy     | ARG5              | 2.35         | -0.99                         | 1                  | 1                        | HH12     | O              |
| ILE102      | Heavy     | HIS6              | 2.45         | -1.60                         | 0                  | 0                        | HG21     | HE1            |



|        |       |      |      |        |    |    |      |     |
|--------|-------|------|------|--------|----|----|------|-----|
| GLY107 | Heavy | HIS6 | 2.47 | -1.85  | 0  | 0  | O    | HE1 |
| ARG105 | Heavy | PHE4 | 2.49 | -1.65  | 1  | 0  | HB2  | HZ  |
| ARG105 | Heavy | HIS6 | 2.59 | -2.50  | 1  | 0  | HH12 | HA  |
| TYR59  | Heavy | PHE4 | 2.68 | -1.42  | 0  | 0  | OH   | HD1 |
| LYS57  | Heavy | PHE4 | 2.85 | -1.70  | 1  | 0  | HD2  | HE1 |
| TRP52  | Heavy | PHE4 | 3.15 | -1.69  | 0  | 0  | HZ2  | HE1 |
| TYR109 | Heavy | HIS6 | 4.06 | -2.01  | 0  | 0  | HA   | HE2 |
| ARG106 | Heavy | HIS6 | 4.46 | -0.17  | 1  | 0  | C    | HE1 |
| GLY103 | Heavy | HIS6 | 4.58 | -0.08  | 0  | 0  | HA3  | HE1 |
| GLY101 | Heavy | HIS6 | 4.92 | 0.01   | 0  | 0  | HA2  | HE1 |
| GLY107 | Heavy | PHE4 | 5.33 | -0.13  | 0  | 0  | H    | HZ  |
| TRP52  | Heavy | HIS6 | 5.50 | -0.21  | 0  | 0  | HZ2  | HE1 |
| GLY103 | Heavy | ASP7 | 5.57 | -0.27  | 0  | -2 | HA3  | H   |
| ALA104 | Heavy | ASP7 | 5.63 | -0.85  | 0  | -2 | HB3  | OD2 |
| ARG106 | Heavy | PHE4 | 5.88 | -0.17  | 1  | 0  | N    | HZ  |
| TRP52  | Heavy | ARG5 | 6.02 | -0.08  | 0  | 1  | HH2  | HA  |
| TYR59  | Heavy | GLU3 | 6.15 | -0.13  | 0  | -1 | HH   | HB3 |
| ILE102 | Heavy | ASP7 | 6.36 | -0.04  | 0  | -2 | HG22 | H   |
| PRO108 | Heavy | PHE4 | 6.42 | -0.08  | 0  | 0  | HD2  | HE1 |
| ALA104 | Heavy | PHE4 | 6.50 | 0.23   | 0  | 0  | C    | HZ  |
| ASP99  | Heavy | HIS6 | 6.52 | -0.23  | -1 | 0  | OD1  | HE2 |
| PRO108 | Heavy | ARG5 | 6.58 | -0.30  | 0  | 1  | HD3  | HA  |
| ALA104 | Heavy | HIS6 | 6.64 | -0.18  | 0  | 0  | H    | HA  |
| GLY107 | Heavy | ARG5 | 6.75 | -0.09  | 0  | 1  | HA3  | HA  |
| THR56  | Heavy | PHE4 | 6.95 | -0.03  | 0  | 0  | OG1  | HE1 |
| TYR110 | Heavy | HIS6 | 7.02 | -0.10  | 0  | 0  | N    | HE2 |
| TYR59  | Heavy | ARG5 | 7.14 | -0.08  | 0  | 1  | HH   | N   |
| HIS35  | Heavy | HIS6 | 7.16 | -0.01  | 0  | 0  | HE1  | HE2 |
| ARG100 | Heavy | HIS6 | 7.47 | 0.02   | 1  | 0  | O    | HE1 |
| ARG106 | Heavy | ASP7 | 7.56 | -1.34  | 1  | -2 | H    | H   |
| ILE102 | Heavy | PHE4 | 7.80 | -0.02  | 0  | 0  | O    | HZ  |
| GLY107 | Heavy | ASP7 | 7.81 | 0.10   | 0  | -2 | H    | H   |
| LYS58  | Heavy | PHE4 | 7.88 | -0.07  | 1  | 0  | H    | HE1 |
| GLY103 | Heavy | ARG5 | 7.92 | -0.04  | 0  | 1  | HA3  | O   |
| GLY103 | Heavy | PHE4 | 7.93 | 0.00   | 0  | 0  | HA3  | HZ  |
| TYR32  | Light | ASP7 | 1.69 | -7.44  | 0  | -2 | HH   | OXT |
| SER93  | Light | GLU3 | 1.93 | -14.64 | 0  | -1 | HG   | OE2 |
| THR94  | Light | GLU3 | 2.36 | -1.59  | 0  | -1 | H    | OE1 |
| TYR32  | Light | HIS6 | 2.45 | -5.94  | 0  | 0  | HB2  | HD2 |
| TYR92  | Light | ARG5 | 3.04 | -3.51  | 0  | 1  | O    | HB2 |
| TYR91  | Light | HIS6 | 3.08 | -1.52  | 0  | 0  | O    | HD2 |
| TYR92  | Light | HIS6 | 3.20 | -0.67  | 0  | 0  | HD1  | HB3 |
| TYR92  | Light | ASP7 | 4.23 | 0.04   | 0  | -2 | HH   | O   |
| TYR92  | Light | GLU3 | 4.29 | -0.42  | 0  | -1 | O    | HG3 |
| SER93  | Light | ARG5 | 4.39 | 0.11   | 0  | 1  | HA   | HB2 |
| THR94  | Light | PHE4 | 4.41 | -0.24  | 0  | 0  | HG1  | O   |
| ASP1   | Light | GLU3 | 4.50 | 0.07   | 0  | -1 | HB2  | OE2 |
| ILE2   | Light | GLU3 | 5.09 | -0.23  | 0  | -1 | HD13 | OE2 |

|       |       |      |      |       |   |    |      |      |
|-------|-------|------|------|-------|---|----|------|------|
| TYR91 | Light | ARG5 | 5.12 | -0.40 | 0 | 1  | O    | HA   |
| TYR92 | Light | PHE4 | 5.19 | -0.29 | 0 | 0  | O    | O    |
| SER93 | Light | PHE4 | 5.24 | -0.29 | 0 | 0  | HA   | O    |
| THR94 | Light | ARG5 | 5.49 | -0.24 | 0 | 1  | HG1  | HB2  |
| ILE2  | Light | ARG5 | 5.59 | -0.02 | 0 | 1  | HD13 | HH22 |
| PRO95 | Light | GLU3 | 5.62 | 1.08  | 0 | -1 | N    | OE1  |
| SER30 | Light | ASP7 | 5.64 | -0.14 | 0 | -2 | HB3  | OXT  |
| SER30 | Light | HIS6 | 5.65 | -0.10 | 0 | 0  | HB3  | HB3  |
| LEU96 | Light | HIS6 | 5.85 | -0.10 | 0 | 0  | HD22 | HE2  |
| SER93 | Light | HIS6 | 6.04 | -0.12 | 0 | 0  | H    | HD2  |
| SER31 | Light | ASP7 | 6.17 | -0.25 | 0 | -2 | HB2  | OXT  |
| ILE29 | Light | HIS6 | 6.18 | -0.13 | 0 | 0  | O    | HB3  |
| TYR32 | Light | ARG5 | 6.24 | -0.44 | 0 | 1  | CD1  | HB3  |
| SER31 | Light | HIS6 | 6.26 | -0.25 | 0 | 0  | H    | HB3  |
| LEU33 | Light | HIS6 | 6.31 | -0.15 | 0 | 0  | N    | HD2  |
| TYR91 | Light | PHE4 | 6.36 | -0.04 | 0 | 0  | O    | O    |
| ILE29 | Light | ARG5 | 6.37 | -0.11 | 0 | 1  | HA   | HD2  |
| SER28 | Light | ARG5 | 6.46 | -0.24 | 0 | 1  | O    | HD2  |
| GLN90 | Light | HIS6 | 6.54 | -0.06 | 0 | 0  | C    | HD2  |
| ASP1  | Light | ARG5 | 6.66 | -0.32 | 0 | 1  | OD2  | HH21 |
| GLN27 | Light | ARG5 | 6.69 | -0.11 | 0 | 1  | OE1  | HH21 |
| GLN90 | Light | GLU3 | 6.74 | 0.01  | 0 | -1 | HE22 | OE2  |
| LEU96 | Light | GLU3 | 6.75 | -0.03 | 0 | -1 | HD23 | OE1  |
| THR94 | Light | HIS6 | 6.90 | -0.05 | 0 | 0  | HG1  | H    |
| LEU96 | Light | PHE4 | 7.06 | -0.03 | 0 | 0  | HD21 | O    |
| GLN27 | Light | GLU3 | 7.16 | 0.03  | 0 | -1 | HG3  | OE2  |
| LEU96 | Light | ARG5 | 7.17 | -0.02 | 0 | 1  | HD21 | HA   |
| SER30 | Light | ARG5 | 7.25 | -0.04 | 0 | 1  | HB3  | HB3  |
| TYR91 | Light | GLU3 | 7.34 | -0.13 | 0 | -1 | O    | HG3  |
| ILE29 | Light | ASP7 | 7.76 | 0.06  | 0 | -2 | O    | OXT  |
| GLN90 | Light | ARG5 | 7.76 | -0.09 | 0 | 1  | OE1  | HB2  |
| ASN34 | Light | HIS6 | 7.81 | -0.04 | 0 | 0  | HD22 | HE2  |
| ILE29 | Light | GLU3 | 7.84 | 0.01  | 0 | -1 | HG23 | OE2  |
| TYR92 | Light | ALA2 | 7.85 | -0.23 | 0 | 1  | HE2  | HB3  |
| SER93 | Light | ALA2 | 7.89 | 0.23  | 0 | 1  | HG   | HB1  |

**Table S27** – Quantum biochemistry details of RC MD6-#6

| <b>Adu Residue</b> | <b>Adu Chain</b> | <b>A<math>\beta</math> Residue</b> | <b>Distance (Å)</b> | <b>Interaction Energy (kcal/mol)</b> | <b>Adu Residue Charge</b> | <b>A<math>\beta</math> Residue Charge</b> | <b>Adu Atom</b> | <b>A<math>\beta</math> Atom</b> |
|--------------------|------------------|------------------------------------|---------------------|--------------------------------------|---------------------------|-------------------------------------------|-----------------|---------------------------------|
| TYR59              | Heavy            | GLU3                               | 1.49                | -12.11                               | 0                         | -1                                        | HH              | OE1                             |
| LYS57              | Heavy            | GLU3                               | 1.65                | -13.21                               | 1                         | -1                                        | HZ2             | OE1                             |
| PRO108             | Heavy            | HIS6                               | 1.99                | -5.64                                | 0                         | 0                                         | O               | HE2                             |
| ILE102             | Heavy            | HIS6                               | 2.31                | -2.41                                | 0                         | 0                                         | O               | HE1                             |
| TYR59              | Heavy            | PHE4                               | 2.38                | -3.06                                | 0                         | 0                                         | OH              | H                               |
| LYS57              | Heavy            | PHE4                               | 2.55                | -3.48                                | 1                         | 0                                         | HG3             | HE2                             |
| ARG105             | Heavy            | PHE4                               | 2.80                | -4.70                                | 1                         | 0                                         | HD2             | CZ                              |

|        |       |      |      |       |    |    |      |     |
|--------|-------|------|------|-------|----|----|------|-----|
| TRP52  | Heavy | PHE4 | 2.83 | -5.04 | 0  | 0  | CE2  | HD2 |
| GLY107 | Heavy | HIS6 | 2.86 | -2.02 | 0  | 0  | H    | HE1 |
| LYS57  | Heavy | ALA2 | 3.50 | 1.71  | 1  | 1  | HZ1  | O   |
| THR56  | Heavy | PHE4 | 3.79 | -0.44 | 0  | 0  | OG1  | HE2 |
| TYR109 | Heavy | HIS6 | 3.87 | -1.63 | 0  | 0  | HA   | HE2 |
| GLY103 | Heavy | HIS6 | 4.14 | -0.52 | 0  | 0  | HA3  | HE1 |
| TRP52  | Heavy | ARG5 | 4.25 | -0.23 | 0  | 1  | HH2  | HA  |
| ARG106 | Heavy | HIS6 | 4.75 | 0.20  | 1  | 0  | C    | HE1 |
| ARG105 | Heavy | ARG5 | 4.95 | 0.58  | 1  | 1  | HH12 | H   |
| GLY107 | Heavy | PHE4 | 4.98 | -0.18 | 0  | 0  | HA3  | HB2 |
| ASP54  | Heavy | PHE4 | 5.11 | -0.22 | -1 | 0  | OD2  | HE2 |
| GLY101 | Heavy | HIS6 | 5.19 | 0.11  | 0  | 0  | HA2  | HE2 |
| TYR59  | Heavy | ALA2 | 5.21 | -0.08 | 0  | 1  | HH   | O   |
| TRP52  | Heavy | HIS6 | 5.31 | -0.32 | 0  | 0  | HH2  | H   |
| ARG105 | Heavy | ALA2 | 5.39 | 0.99  | 1  | 1  | HH21 | HB2 |
| PRO108 | Heavy | ARG5 | 5.49 | -0.33 | 0  | 1  | HD3  | HA  |
| PRO108 | Heavy | PHE4 | 5.72 | -0.16 | 0  | 0  | HD3  | O   |
| GLY103 | Heavy | ASP7 | 5.74 | -0.27 | 0  | -2 | HA3  | H   |
| ARG105 | Heavy | ASP7 | 5.78 | -2.43 | 1  | -2 | HH12 | OD2 |
| TYR59  | Heavy | ARG5 | 5.81 | 0.03  | 0  | 1  | HE2  | N   |
| GLY107 | Heavy | ARG5 | 5.85 | -0.03 | 0  | 1  | HA3  | HA  |
| LYS58  | Heavy | GLU3 | 6.05 | -0.82 | 1  | -1 | H    | OE1 |
| ALA104 | Heavy | ASP7 | 6.18 | -0.36 | 0  | -2 | H    | OD1 |
| ARG105 | Heavy | HIS6 | 6.31 | -0.31 | 1  | 0  | C    | HE1 |
| ASP99  | Heavy | HIS6 | 6.33 | -0.24 | -1 | 0  | OD1  | HE2 |
| ALA104 | Heavy | HIS6 | 6.41 | -0.10 | 0  | 0  | H    | HE1 |
| ILE102 | Heavy | ASP7 | 6.48 | -0.06 | 0  | -2 | HG23 | H   |
| ARG106 | Heavy | PHE4 | 6.61 | -0.17 | 1  | 0  | N    | HB2 |
| TRP52  | Heavy | GLU3 | 6.68 | -0.32 | 0  | -1 | HH2  | C   |
| PHE53  | Heavy | PHE4 | 6.71 | -0.12 | 0  | 0  | H    | HD2 |
| TYR110 | Heavy | HIS6 | 6.87 | -0.09 | 0  | 0  | N    | HE2 |
| ARG105 | Heavy | GLU3 | 6.90 | -1.33 | 1  | -1 | HE   | C   |
| VAL50  | Heavy | PHE4 | 7.13 | -0.04 | 0  | 0  | HG13 | HD2 |
| LYS65  | Heavy | GLU3 | 7.23 | -0.98 | 1  | -1 | HZ3  | HG3 |
| LYS58  | Heavy | PHE4 | 7.33 | -0.18 | 1  | 0  | N    | HD2 |
| ILE102 | Heavy | PHE4 | 7.36 | -0.04 | 0  | 0  | O    | HB2 |
| HIS35  | Heavy | HIS6 | 7.43 | 0.00  | 0  | 0  | HE1  | HE2 |
| LYS57  | Heavy | ARG5 | 7.52 | 0.71  | 1  | 1  | HE3  | H   |
| GLY107 | Heavy | ASP7 | 7.54 | 0.00  | 0  | -2 | HA3  | H   |
| ALA104 | Heavy | PHE4 | 7.62 | -0.04 | 0  | 0  | HB2  | HB2 |
| GLY55  | Heavy | PHE4 | 7.68 | -0.01 | 0  | 0  | H    | HE2 |
| GLY103 | Heavy | PHE4 | 7.69 | -0.01 | 0  | 0  | HA3  | HB2 |
| GLY103 | Heavy | ARG5 | 7.78 | -0.05 | 0  | 1  | HA3  | O   |
| THR56  | Heavy | GLU3 | 7.84 | -0.13 | 0  | -1 | HB   | OE1 |
| ARG100 | Heavy | HIS6 | 7.87 | 0.07  | 1  | 0  | HH22 | HE1 |
| TYR32  | Light | ASP7 | 1.80 | -9.45 | 0  | -2 | HH   | OXT |
| TYR92  | Light | ASP7 | 1.82 | -6.45 | 0  | -2 | HH   | O   |
| TYR92  | Light | HIS6 | 2.25 | -3.45 | 0  | 0  | HD1  | HB3 |

|       |       |      |      |       |   |    |      |      |
|-------|-------|------|------|-------|---|----|------|------|
| TYR91 | Light | HIS6 | 2.58 | -1.46 | 0 | 0  | O    | HD2  |
| TYR32 | Light | HIS6 | 2.76 | -6.05 | 0 | 0  | OH   | HB2  |
| SER93 | Light | ARG5 | 3.13 | -2.13 | 0 | 1  | HA   | HB3  |
| TYR92 | Light | ARG5 | 3.60 | -4.25 | 0 | 1  | O    | HB3  |
| SER93 | Light | HIS6 | 4.17 | -0.73 | 0 | 0  | HA   | H    |
| THR94 | Light | ARG5 | 4.62 | -0.84 | 0 | 1  | H    | HB3  |
| SER30 | Light | ASP7 | 4.71 | -0.75 | 0 | -2 | HG   | OXT  |
| THR94 | Light | PHE4 | 5.20 | -0.21 | 0 | 0  | OG1  | O    |
| THR94 | Light | GLU3 | 5.38 | -0.11 | 0 | -1 | HG1  | HB2  |
| LEU96 | Light | HIS6 | 5.56 | -0.12 | 0 | 0  | HD22 | HD2  |
| SER93 | Light | PHE4 | 5.58 | -0.15 | 0 | 0  | HA   | O    |
| TYR91 | Light | ARG5 | 5.85 | -0.19 | 0 | 1  | O    | HA   |
| SER30 | Light | HIS6 | 5.85 | -0.08 | 0 | 0  | HB3  | HB2  |
| THR94 | Light | HIS6 | 6.09 | -0.11 | 0 | 0  | H    | H    |
| ILE29 | Light | HIS6 | 6.18 | -0.17 | 0 | 0  | O    | HB3  |
| ILE2  | Light | ARG5 | 6.21 | -0.02 | 0 | 1  | HD11 | HH11 |
| TYR92 | Light | PHE4 | 6.30 | -0.06 | 0 | 0  | O    | O    |
| GLN90 | Light | HIS6 | 6.45 | -0.13 | 0 | 0  | C    | HD2  |
| SER31 | Light | ASP7 | 6.56 | -0.38 | 0 | -2 | H    | OXT  |
| LEU96 | Light | ARG5 | 6.61 | -0.04 | 0 | 1  | HD21 | HA   |
| TYR32 | Light | ARG5 | 6.67 | -0.30 | 0 | 1  | HH   | O    |
| SER28 | Light | ARG5 | 6.68 | -0.14 | 0 | 1  | O    | HH12 |
| ILE29 | Light | ASP7 | 6.81 | -0.05 | 0 | -2 | O    | OXT  |
| LEU96 | Light | PHE4 | 7.05 | -0.03 | 0 | 0  | HD21 | O    |
| ILE29 | Light | ARG5 | 7.12 | -0.06 | 0 | 1  | HA   | HH12 |
| LEU33 | Light | HIS6 | 7.30 | -0.09 | 0 | 0  | N    | HD2  |
| GLN27 | Light | ARG5 | 7.43 | 0.02  | 0 | 1  | HB2  | HH11 |
| SER28 | Light | ASP7 | 7.52 | 0.11  | 0 | -2 | HG   | O    |
| SER31 | Light | HIS6 | 7.52 | -0.10 | 0 | 0  | H    | HB2  |
| TYR91 | Light | PHE4 | 7.52 | -0.03 | 0 | 0  | O    | O    |
| ASN34 | Light | HIS6 | 7.86 | -0.03 | 0 | 0  | HD22 | HE2  |
| SER93 | Light | GLU3 | 7.92 | -0.10 | 0 | -1 | HA   | O    |
| TYR91 | Light | ASP7 | 7.95 | -0.02 | 0 | -2 | O    | N    |
| ALA50 | Light | HIS6 | 7.96 | -0.01 | 0 | 0  | HB3  | HE2  |

**Table S28** – Quantum biochemistry details of RC MD6-#7

| <b>Adu Residue</b> | <b>Adu Chain</b> | <b>A<math>\beta</math> Residue</b> | <b>Distance (Å)</b> | <b>Interaction Energy (kcal/mol)</b> | <b>Adu Residue Charge</b> | <b>A<math>\beta</math> Residue Charge</b> | <b>Adu Atom</b> | <b>A<math>\beta</math> Atom</b> |
|--------------------|------------------|------------------------------------|---------------------|--------------------------------------|---------------------------|-------------------------------------------|-----------------|---------------------------------|
| PRO108             | Heavy            | HIS6                               | 2.00                | -5.28                                | 0                         | 0                                         | O               | HE2                             |
| GLY107             | Heavy            | PHE4                               | 2.36                | -0.52                                | 0                         | 0                                         | HA3             | HE1                             |
| ARG105             | Heavy            | PHE4                               | 2.52                | -1.96                                | 1                         | 0                                         | HB3             | HZ                              |
| GLY107             | Heavy            | HIS6                               | 2.59                | -1.58                                | 0                         | 0                                         | O               | HE1                             |
| PRO108             | Heavy            | PHE4                               | 2.65                | -1.38                                | 0                         | 0                                         | HD3             | HE1                             |
| TYR109             | Heavy            | HIS6                               | 2.72                | -2.29                                | 0                         | 0                                         | HB3             | HE2                             |
| ILE102             | Heavy            | HIS6                               | 2.83                | -1.95                                | 0                         | 0                                         | HG22            | HE1                             |
| TRP52              | Heavy            | PHE4                               | 2.99                | -3.10                                | 0                         | 0                                         | HZ2             | HZ                              |

|        |       |      |      |       |    |    |      |     |
|--------|-------|------|------|-------|----|----|------|-----|
| TYR59  | Heavy | PHE4 | 3.18 | -3.36 | 0  | 0  | CE2  | HB3 |
| LYS57  | Heavy | PHE4 | 3.32 | -0.97 | 1  | 0  | HE2  | HE2 |
| ARG106 | Heavy | HIS6 | 4.14 | -0.57 | 1  | 0  | C    | HE1 |
| ARG105 | Heavy | ASP7 | 4.21 | -3.48 | 1  | -2 | HG2  | OD1 |
| GLY101 | Heavy | HIS6 | 4.68 | -0.28 | 0  | 0  | HA2  | HE1 |
| GLY103 | Heavy | HIS6 | 4.69 | -0.09 | 0  | 0  | HA3  | HE1 |
| ALA104 | Heavy | ASP7 | 4.75 | -0.84 | 0  | -2 | HB2  | OD1 |
| ARG105 | Heavy | HIS6 | 4.90 | -0.53 | 1  | 0  | HB3  | HA  |
| ARG106 | Heavy | PHE4 | 5.02 | 0.32  | 1  | 0  | N    | HZ  |
| TYR59  | Heavy | ALA2 | 5.11 | -0.16 | 0  | 1  | HE1  | O   |
| LYS65  | Heavy | GLU3 | 5.30 | -1.40 | 1  | -1 | HZ1  | HG3 |
| TRP52  | Heavy | HIS6 | 5.46 | -0.16 | 0  | 0  | HZ2  | HE1 |
| ARG105 | Heavy | ARG5 | 5.49 | 0.73  | 1  | 1  | HG3  | O   |
| TYR59  | Heavy | GLU3 | 5.52 | -0.44 | 0  | -1 | HE1  | HA  |
| GLY103 | Heavy | ASP7 | 5.53 | -0.46 | 0  | -2 | HA3  | H   |
| VAL50  | Heavy | PHE4 | 5.63 | -0.15 | 0  | 0  | HG12 | HD1 |
| ILE102 | Heavy | PHE4 | 5.74 | -0.11 | 0  | 0  | O    | HZ  |
| ASP62  | Heavy | GLU3 | 6.25 | 1.31  | -1 | -1 | OD2  | HG3 |
| ALA104 | Heavy | HIS6 | 6.36 | -0.14 | 0  | 0  | H    | ND1 |
| GLY107 | Heavy | ARG5 | 6.39 | -0.11 | 0  | 1  | HA3  | C   |
| ILE102 | Heavy | ASP7 | 6.47 | -0.09 | 0  | -2 | HG23 | O   |
| ALA104 | Heavy | PHE4 | 6.47 | 0.03  | 0  | 0  | C    | HZ  |
| PRO108 | Heavy | ARG5 | 6.48 | -0.31 | 0  | 1  | HD3  | HA  |
| TYR110 | Heavy | HIS6 | 6.48 | -0.08 | 0  | 0  | H    | HE2 |
| TRP47  | Heavy | PHE4 | 6.49 | -0.07 | 0  | 0  | HH2  | HB2 |
| ASP99  | Heavy | HIS6 | 6.58 | -0.23 | -1 | 0  | OD2  | HE2 |
| GLY103 | Heavy | PHE4 | 6.64 | -0.03 | 0  | 0  | HA3  | HZ  |
| TRP52  | Heavy | ARG5 | 6.67 | -0.09 | 0  | 1  | HH2  | H   |
| GLY107 | Heavy | ASP7 | 6.72 | 0.01  | 0  | -2 | H    | H   |
| LYS57  | Heavy | ARG5 | 6.76 | 0.71  | 1  | 1  | HE2  | H   |
| TYR59  | Heavy | ARG5 | 6.84 | -0.20 | 0  | 1  | HE2  | H   |
| TYR109 | Heavy | PHE4 | 6.89 | -0.08 | 0  | 0  | HB3  | HE1 |
| GLY101 | Heavy | PHE4 | 7.10 | 0.00  | 0  | 0  | HA2  | HE1 |
| ARG106 | Heavy | ASP7 | 7.20 | -1.44 | 1  | -2 | H    | H   |
| TYR60  | Heavy | GLU3 | 7.33 | 0.09  | 0  | -1 | O    | HG3 |
| LYS58  | Heavy | PHE4 | 7.34 | -0.08 | 1  | 0  | O    | HB3 |
| TRP47  | Heavy | GLU3 | 7.37 | 0.03  | 0  | -1 | HZ3  | HG2 |
| LYS65  | Heavy | ALA2 | 7.49 | 1.08  | 1  | 1  | HZ1  | H2  |
| LYS65  | Heavy | PHE4 | 7.61 | -0.07 | 1  | 0  | HZ1  | H   |
| HIS35  | Heavy | HIS6 | 7.62 | 0.00  | 0  | 0  | HE2  | HE2 |
| ARG100 | Heavy | HIS6 | 7.66 | 0.00  | 1  | 0  | O    | HE1 |
| HIS35  | Heavy | PHE4 | 7.70 | -0.02 | 0  | 0  | HE1  | HD1 |
| LYS57  | Heavy | ALA2 | 7.78 | 0.87  | 1  | 1  | HE3  | O   |
| THR61  | Heavy | GLU3 | 7.78 | 0.02  | 0  | -1 | HA   | HG2 |
| TYR60  | Heavy | PHE4 | 7.84 | -0.05 | 0  | 0  | H    | H   |
| SER93  | Light | PHE4 | 1.89 | -7.06 | 0  | 0  | HG   | O   |
| TYR92  | Light | HIS6 | 1.97 | -5.24 | 0  | 0  | O    | H   |
| SER93  | Light | ARG5 | 2.15 | -5.75 | 0  | 1  | HB2  | HG3 |

|       |       |      |      |        |   |    |      |     |
|-------|-------|------|------|--------|---|----|------|-----|
| THR94 | Light | PHE4 | 2.52 | -2.90  | 0 | 0  | H    | O   |
| TYR92 | Light | ARG5 | 2.56 | -10.28 | 0 | 1  | O    | HA  |
| TYR32 | Light | HIS6 | 2.56 | -4.28  | 0 | 0  | HH   | HB2 |
| THR94 | Light | GLU3 | 2.69 | -1.34  | 0 | -1 | O    | HB2 |
| TYR91 | Light | HIS6 | 2.90 | -0.58  | 0 | 0  | O    | HD2 |
| PRO95 | Light | GLU3 | 2.91 | -0.67  | 0 | -1 | HD2  | HG2 |
| SER93 | Light | GLU3 | 3.27 | -0.37  | 0 | -1 | HG   | HB2 |
| SER93 | Light | HIS6 | 3.59 | -1.84  | 0 | 0  | HA   | H   |
| THR94 | Light | ARG5 | 3.65 | -0.83  | 0 | 1  | H    | HA  |
| TYR32 | Light | ASP7 | 3.70 | -0.35  | 0 | -2 | HH   | O   |
| ASP1  | Light | GLU3 | 4.07 | -0.29  | 0 | -1 | H3   | OE1 |
| LEU96 | Light | PHE4 | 4.42 | -0.26  | 0 | 0  | HD22 | HD1 |
| TYR92 | Light | ASP7 | 4.48 | 0.11   | 0 | -2 | HE1  | OXT |
| TYR92 | Light | PHE4 | 4.82 | -1.43  | 0 | 0  | O    | O   |
| ILE2  | Light | ARG5 | 4.83 | -0.09  | 0 | 1  | HD13 | HG3 |
| TYR91 | Light | PHE4 | 5.02 | -0.25  | 0 | 0  | O    | HE1 |
| TYR91 | Light | ARG5 | 5.12 | -0.42  | 0 | 1  | O    | HA  |
| THR94 | Light | HIS6 | 5.40 | -0.13  | 0 | 0  | H    | H   |
| SER30 | Light | HIS6 | 5.93 | -0.10  | 0 | 0  | HB3  | HB3 |
| PRO95 | Light | PHE4 | 6.01 | 0.03   | 0 | 0  | N    | O   |
| GLN27 | Light | ARG5 | 6.23 | 0.08   | 0 | 1  | HE21 | HD2 |
| THR94 | Light | ALA2 | 6.34 | -0.44  | 0 | 1  | HG1  | O   |
| ILE29 | Light | ARG5 | 6.38 | -0.08  | 0 | 1  | HA   | HG3 |
| LEU96 | Light | HIS6 | 6.41 | -0.07  | 0 | 0  | HD22 | HE2 |
| SER28 | Light | ARG5 | 6.42 | -0.19  | 0 | 1  | O    | HD2 |
| ILE29 | Light | HIS6 | 6.45 | -0.17  | 0 | 0  | O    | HD2 |
| TYR32 | Light | ARG5 | 6.52 | -0.20  | 0 | 1  | HE1  | HG2 |
| LEU96 | Light | ARG5 | 6.63 | -0.06  | 0 | 1  | HD21 | HA  |
| ILE2  | Light | GLU3 | 6.64 | -0.08  | 0 | -1 | H    | HG2 |
| GLN90 | Light | ARG5 | 6.75 | -0.11  | 0 | 1  | HE22 | HA  |
| GLN90 | Light | PHE4 | 6.79 | -0.06  | 0 | 0  | HE22 | O   |
| GLN90 | Light | HIS6 | 6.93 | -0.12  | 0 | 0  | OE1  | HD2 |
| ILE2  | Light | PHE4 | 7.02 | -0.04  | 0 | 0  | HD13 | O   |
| SER30 | Light | ASP7 | 7.17 | -0.15  | 0 | -2 | HG   | OXT |
| ILE2  | Light | HIS6 | 7.17 | -0.10  | 0 | 0  | HD13 | H   |
| SER31 | Light | HIS6 | 7.20 | -0.14  | 0 | 0  | H    | HD2 |
| SER93 | Light | ALA2 | 7.24 | -0.01  | 0 | 1  | HG   | C   |
| GLN90 | Light | GLU3 | 7.30 | -0.04  | 0 | -1 | HE22 | HB2 |
| TYR92 | Light | GLU3 | 7.47 | -0.03  | 0 | -1 | O    | HB2 |
| TYR32 | Light | PHE4 | 7.52 | -0.06  | 0 | 0  | HE2  | HE1 |
| LEU96 | Light | GLU3 | 7.54 | -0.06  | 0 | -1 | HD21 | HB2 |
| ASN34 | Light | HIS6 | 7.57 | -0.01  | 0 | 0  | HD22 | HE2 |
| LEU33 | Light | HIS6 | 7.63 | -0.05  | 0 | 0  | N    | HD2 |
| SER30 | Light | ARG5 | 7.66 | 0.00   | 0 | 1  | HB3  | HG2 |
| PRO95 | Light | ARG5 | 7.69 | -0.14  | 0 | 1  | N    | HA  |
| SER93 | Light | ASP7 | 7.85 | 0.02   | 0 | -2 | HB2  | N   |
| ASP1  | Light | PHE4 | 7.89 | -0.07  | 0 | 0  | HA   | O   |
| PRO95 | Light | ALA2 | 7.92 | -0.23  | 0 | 1  | HD2  | C   |

|       |       |      |      |      |   |    |   |   |
|-------|-------|------|------|------|---|----|---|---|
| TYR91 | Light | ASP7 | 7.98 | 0.16 | 0 | -2 | O | H |
|-------|-------|------|------|------|---|----|---|---|

---

**Table S29** – Quantum description of energetic hot spots based on representative conformations.

|                    |                    | MD2-<br>#0 | MD2-<br>#1 | MD2-<br>#2 | MD2-<br>#3 | MD2-<br>#4 | MD2-<br>#5 | MD2-<br>#6 | MD2-<br>#7 | MD2-<br>#8 | MD6-<br>#0 | MD6-<br>#1 | MD6-<br>#2 | MD6-<br>#3 | MD6-<br>#4 | MD6-<br>#5 | MD6-<br>#6 | MD6-<br>#7 |       |
|--------------------|--------------------|------------|------------|------------|------------|------------|------------|------------|------------|------------|------------|------------|------------|------------|------------|------------|------------|------------|-------|
| <b>HC Residues</b> | <b>Adu-Residue</b> |            |            |            |            |            |            |            |            |            |            |            |            |            |            |            |            |            |       |
|                    | <b>H2</b>          | VAL50      | -0.18      | -0.25      | -0.26      | -0.16      | -0.23      | -0.19      | -0.20      | -0.15      | -0.19      | -0.03      | -0.05      | -0.05      | -0.04      | -0.31      | -0.03      | -0.05      | -0.17 |
|                    |                    | TRP52      | -3.67      | -3.17      | -3.80      | -3.08      | -3.98      | -3.97      | -3.41      | -4.11      | -4.25      | -3.63      | -2.83      | -2.85      | -5.15      | -3.92      | -2.02      | -5.99      | -3.46 |
|                    |                    | LYS57      | -0.09      | -0.89      | -0.75      | -1.71      | -0.96      | -1.15      | 0.31       | -0.75      | -0.57      | -11.78     | -2.73      | -1.91      | -14.74     | -1.56      | -1.95      | -14.26     | -2.15 |
|                    |                    | LYS58      | -0.98      | -1.06      | -1.26      | -0.40      | -1.18      | -0.59      | -0.50      | -1.31      | -1.16      | -1.31      | -0.10      | -0.12      | -0.69      | -0.21      | -0.07      | -1.00      | -0.10 |
|                    |                    | TYR59      | -7.51      | -7.86      | -8.32      | -7.38      | -8.09      | -7.70      | -7.16      | -8.00      | -5.63      | -14.59     | -1.90      | -2.51      | -17.60     | -7.88      | -1.65      | -15.25     | -4.18 |
|                    |                    | TYR60      | -0.18      | 0.06       | 0.40       | 3.19       | 0.21       | 1.54       | 1.09       | 0.00       | -0.29      | 0.10       | -0.01      | -0.02      | 0.02       | -0.38      | 0.14       | 0.10       | -0.11 |
|                    |                    | THR61      | 0.11       | 0.12       | 0.15       | 0.63       | 0.18       | 0.02       | -0.08      | 0.03       | -0.01      | 0.00       | 0.00       | 0.00       | 0.00       | -0.20      | 0.06       | 0.00       | 0.01  |
|                    |                    | ASP62      | 0.41       | 1.05       | 1.13       | 1.13       | 0.23       | 1.33       | 1.61       | 1.63       | 0.55       | 0.00       | 0.97       | 1.17       | 0.00       | 0.58       | 1.18       | 0.00       | 0.40  |
|                    |                    | LYS65      | -9.15      | -12.78     | -9.11      | -10.77     | -9.46      | -9.51      | -10.49     | -10.22     | -12.38     | 0.00       | 0.00       | -0.01      | -1.25      | -0.68      | -1.06      | -0.98      | -0.40 |
|                    |                    | ASP99      | -0.27      | -0.29      | -0.33      | -0.32      | -0.21      | -0.30      | -0.29      | -0.24      | -0.22      | -0.24      | -0.24      | -0.24      | -0.18      | -0.20      | -0.23      | -0.24      | -0.27 |
|                    | ARG100             | -0.02      | -0.02      | 0.00       | 0.03       | -0.06      | 0.00       | 0.00       | -0.02      | -0.03      | -0.01      | 0.02       | 0.05       | 0.03       | 0.01       | 0.02       | 0.07       | 0.00       |       |
|                    | GLY101             | -0.23      | -0.19      | 0.14       | -0.17      | -0.06      | 0.10       | -0.11      | -0.10      | 0.27       | 0.05       | -0.29      | -0.05      | -0.32      | -0.22      | 0.01       | 0.12       | -0.28      |       |
|                    | <b>H3</b>          | ILE102     | -2.02      | -1.35      | -1.56      | -0.99      | -2.44      | -0.37      | -1.52      | -1.77      | -1.06      | -0.54      | -2.02      | -1.59      | -1.54      | -2.30      | -1.74      | -2.58      | -2.18 |
|                    |                    | GLY103     | -0.47      | -0.54      | -0.32      | -1.11      | -0.11      | -0.53      | -1.17      | -0.42      | -1.20      | -1.70      | -0.97      | -0.71      | -0.81      | -1.39      | -0.39      | -0.84      | -0.56 |
|                    |                    | ALA104     | -0.48      | -0.42      | -0.37      | -0.44      | 0.01       | -1.07      | -0.89      | -0.46      | -0.96      | -0.80      | -1.86      | -0.94      | -0.19      | -1.09      | -0.82      | -0.48      | -0.87 |
|                    |                    | ARG105     | -6.38      | -4.40      | -22.31     | -14.92     | -5.42      | -16.95     | -4.91      | -16.86     | -5.25      | -8.81      | -25.64     | -23.61     | -10.86     | -19.13     | -22.48     | -7.20      | -5.85 |
|                    |                    | ARG106     | -0.87      | -1.59      | -0.71      | -1.58      | 0.77       | -1.17      | -1.02      | -1.02      | -1.19      | -1.15      | -0.66      | -1.25      | -2.05      | -1.58      | -1.18      | -0.78      | -1.14 |
|                    |                    | GLY107     | -2.74      | -2.97      | -2.17      | -4.04      | -1.55      | -4.46      | -3.10      | -2.03      | -2.73      | -2.62      | -1.04      | -2.34      | -1.88      | -2.97      | -1.97      | -2.28      | -2.20 |
| PRO108             |                    | -4.73      | -5.20      | -7.60      | -6.79      | -7.07      | -6.74      | -7.06      | -5.40      | -6.31      | -5.46      | -4.50      | -5.36      | -4.85      | -5.51      | -5.84      | -5.72      | -6.51      |       |
| TYR109             |                    | -2.49      | -2.36      | -2.33      | -3.29      | -2.42      | -2.16      | -1.70      | -2.46      | -2.13      | -2.13      | -1.51      | -1.75      | -1.60      | -2.14      | -2.01      | -1.63      | -2.32      |       |
| TYR110             |                    | -0.19      | -0.32      | -0.17      | -0.14      | -0.13      | -0.18      | -0.12      | -0.14      | -0.13      | -0.08      | -0.09      | -0.13      | -0.07      | -0.12      | -0.10      | -0.09      | -0.09      |       |
| <b>LC Residues</b> | ASP1               | -4.73      | -14.27     | -11.70     | 0.34       | -9.32      | -0.17      | 0.08       | -0.26      | -0.57      | 0.00       | 0.62       | -0.55      | 0.18       | -0.22      | -0.59      | 0.09       | -0.22      |       |
|                    | ILE2               | -0.63      | -0.49      | -0.49      | -0.21      | -0.58      | -0.18      | -0.18      | -0.29      | -0.37      | -0.02      | -0.24      | -0.40      | -0.10      | -0.17      | -0.34      | -0.04      | -0.30      |       |



|       |                 |        |        |        |        |        |        |        |        |       |        |        |        |        |        |        |        |        |
|-------|-----------------|--------|--------|--------|--------|--------|--------|--------|--------|-------|--------|--------|--------|--------|--------|--------|--------|--------|
| L3    | SER28           | 0.07   | -0.34  | -0.09  | -0.19  | -0.23  | -0.09  | -0.06  | -0.25  | -0.27 | 0.24   | -0.15  | -0.06  | -0.04  | -0.38  | 0.10   | -0.04  | -0.03  |
|       | ILE29           | -0.22  | -0.26  | -0.28  | -0.45  | -0.35  | -0.21  | -0.33  | -0.21  | -0.25 | -0.08  | -0.21  | -0.33  | -0.29  | -0.22  | -0.18  | -0.28  | -0.21  |
|       | SER30           | -0.24  | -0.16  | -0.22  | -0.81  | -0.16  | -0.25  | -0.30  | -0.24  | -0.38 | -0.57  | -0.59  | -0.82  | -0.57  | -0.24  | -0.27  | -0.86  | -0.25  |
|       | SER31           | -0.20  | -0.12  | -0.15  | -0.30  | -0.18  | -0.22  | -0.28  | -0.20  | -0.17 | -0.39  | -0.34  | -0.47  | -0.38  | -0.23  | -0.47  | -0.48  | -0.17  |
|       | TYR32           | -5.94  | -4.56  | -5.48  | -4.92  | -5.22  | -5.03  | -4.61  | -3.76  | -4.92 | -13.99 | -13.32 | -14.08 | -14.84 | -4.50  | -13.85 | -15.79 | -4.88  |
|       | ASN34           | -0.02  | -0.04  | -0.03  | -0.03  | -0.02  | 0.00   | -0.01  | -0.02  | -0.01 | -0.02  | -0.04  | -0.03  | -0.04  | -0.03  | -0.04  | -0.03  | -0.01  |
|       | GLN90           | -0.29  | -0.43  | -0.35  | -0.29  | -0.22  | -0.32  | -0.36  | -0.28  | -0.34 | -0.17  | -0.19  | -0.25  | -0.13  | -0.31  | -0.15  | -0.17  | -0.33  |
|       | SER91/<br>TYR91 | -0.42  | -0.21  | -0.50  | -0.97  | -0.56  | -0.67  | -0.83  | -0.92  | -1.19 | -1.93  | -1.22  | -2.02  | -1.87  | -0.42  | -1.97  | -1.69  | -1.10  |
|       | TYR92           | -13.45 | -15.59 | -14.44 | -19.70 | -21.31 | -17.59 | -15.24 | -17.57 | -9.84 | -1.02  | -8.13  | -9.30  | -8.74  | -17.93 | -5.08  | -14.11 | -16.87 |
|       | SER93           | -9.91  | -11.44 | -10.73 | -10.23 | -11.55 | -8.42  | -7.98  | -10.73 | -7.75 | -0.75  | -8.19  | -9.23  | -3.69  | -10.49 | -14.69 | -2.92  | -15.01 |
|       | THR94           | -7.80  | -8.07  | -10.37 | -20.79 | -10.97 | -19.51 | -20.90 | -10.81 | -9.43 | -0.48  | -2.35  | -1.41  | -1.09  | -10.42 | -2.19  | -1.34  | -5.45  |
|       | PRO95           | -1.14  | -1.69  | -1.36  | -2.16  | -1.55  | -1.20  | -1.69  | -1.45  | -1.64 | -0.08  | 0.30   | 0.06   | -0.20  | -0.60  | 0.91   | -0.25  | -1.01  |
| LEU96 | -0.61           | -0.72  | -0.76  | -0.48  | -0.75  | -0.79  | -0.59  | -0.84  | -0.72  | -0.17 | -0.19  | -0.25  | -0.16  | -0.33  | -0.18  | -0.21  | -0.43  |        |
